# Supplementary material for: Incentivised case finding for depression in patients with chronic heart disease and diabetes in primary care: an ethnographic study
Source: PubMed Central journal article supplement — BMJ Open. 2014 Aug 16;4(8):e005146. doi: 10.1136/bmjopen-2014-005146 (PMC4139645; doi:10.1136/bmjopen-2014-005146), 2014-08-16
Supplement: bmjopen-2014-005146.draft_revisions.pdf [file bmjopen-2014-005146.draft_revisions.pdf]

# BMJ Open

## Incentivised case finding for depression in patients with chronic heart disease and diabetes in primary care: an ethnographic study

|                                 |                                                                                                                                                                                                                                                                                                                                                                                                                               |
|---------------------------------|-------------------------------------------------------------------------------------------------------------------------------------------------------------------------------------------------------------------------------------------------------------------------------------------------------------------------------------------------------------------------------------------------------------------------------|
| Journal:                        | <i>BMJ Open</i>                                                                                                                                                                                                                                                                                                                                                                                                               |
| Manuscript ID:                  | bmjopen-2014-005146                                                                                                                                                                                                                                                                                                                                                                                                           |
| Article Type:                   | Research                                                                                                                                                                                                                                                                                                                                                                                                                      |
| Date Submitted by the Author:   | 27-Feb-2014                                                                                                                                                                                                                                                                                                                                                                                                                   |
| Complete List of Authors:       | Alderson, Sarah; University of Leeds, Leeds Institute of Health Sciences<br>Russell, Amy; University of Leeds, Leeds Institute of Health Sciences<br>McLintock, Kate; University of Leeds, Leeds Institute of Health Sciences<br>Potrata, Barbara; University of Leeds, Leeds Institute of Health Sciences<br>House, AO; Academic Unit of Psychiatry,<br>Foy, Robbie; University of Leeds, Leeds Institute of Health Sciences |
| <b>Primary Subject Heading</b>: | General practice / Family practice                                                                                                                                                                                                                                                                                                                                                                                            |
| Secondary Subject Heading:      | Patient-centred medicine, Mental health, Health policy, Cardiovascular medicine, Diabetes and endocrinology                                                                                                                                                                                                                                                                                                                   |
| Keywords:                       | PRIMARY CARE, Coronary heart disease < CARDIOLOGY, General diabetes < DIABETES & ENDOCRINOLOGY, MENTAL HEALTH, Depression & mood disorders < PSYCHIATRY, QUALITATIVE RESEARCH                                                                                                                                                                                                                                                 |
|                                 |                                                                                                                                                                                                                                                                                                                                                                                                                               |

SCHOLARONE™  
Manuscripts

Only

1  
2  
3 **Incentivised case finding for depression in patients with chronic heart disease and**  
4 **diabetes in primary care: an ethnographic study**  
5

6 Sarah L Alderson, Amy M Russell, Kate McLintock, Barbara Potrata, Allan House, Robbie  
7 Foy  
8

9 Leeds Institute of Health Sciences, Charles Thackrah Building, University of Leeds, 101  
10 Clarendon Road, Leeds, LS2 9LJ. Sarah L Alderson  
11 Clinical Lecturer in Primary Care  
12

13  
14 Leeds Institute of Health Sciences, Charles Thackrah Building, University of Leeds, 101  
15 Clarendon Road, Leeds, LS2 9LJ. Amy M Russell  
16 Senior Research Fellow  
17

18  
19 Leeds Institute of Health Sciences, Charles Thackrah Building, University of Leeds, 101  
20 Clarendon Road, Leeds, LS2 9LJ. Kate McLintock  
21 Clinical Lecturer in Primary Care  
22

23  
24 Leeds Institute of Health Sciences, Charles Thackrah Building, University of Leeds, 101  
25 Clarendon Road, Leeds, LS2 9LJ. Barbara Potrata  
26 Research Fellow  
27

28  
29 Leeds Institute of Health Sciences, Charles Thackrah Building, University of Leeds, 101  
30 Clarendon Road, Leeds, LS2 9LJ. Allan House  
31 Professor of Liaison Psychiatry  
32

33  
34 Leeds Institute of Health Sciences, Charles Thackrah Building, University of Leeds, 101  
35 Clarendon Road, Leeds, LS2 9LJ. Robbie Foy  
36 Professor of Primary Care  
37

38 The Corresponding Author has the right to grant on behalf of all authors and does grant on  
39 behalf of all authors, a worldwide licence to the Publishers and its licensees in perpetuity, in  
40 all forms, formats and media (whether known now or created in the future), to i) publish,  
41 reproduce, distribute, display and store the Contribution, ii) translate the Contribution into  
42 other languages, create adaptations, reprints, include within collections and create  
43 summaries, extracts and/or, abstracts of the Contribution, iii) create any other derivative  
44 work(s) based on the Contribution, iv) to exploit all subsidiary rights in the Contribution, v)  
45 the inclusion of electronic links from the Contribution to third party material where-ever it may  
46 be located; and, vi) licence any third party to do any or all of the above.  
47  
48  
49  
50  
51  
52  
53  
54  
55  
56  
57  
58  
59  
60

## Abstract

### *Objective.*

To examine the process of case-finding for depression in people with diabetes and coronary heart disease within the context of a pay-for-performance scheme.

### *Design*

Ethnographic study drawing upon observations of practice routines and consultations, debriefing interviews with staff and patients, and review of patient records.

### *Setting*

General practices in Leeds, United Kingdom.

### *Participants.*

Twelve purposively sampled practices with a total of 119 staff; 63 consultation observations; and 57 patient interviews.

### *Main outcome measure.*

Audio-recorded consultations and interviews along with observation field notes were thematically analysed using a constant comparison and contrastive approach. We assessed outcomes of screening from patient records.

### *Results.*

Case-finding exacerbated the discordance between patient and professional agendas, the latter already dominated by the need for a tightly structured and time-limited interaction to document performance. Professional beliefs and abilities affected how case-finding was undertaken; there was uncertainty about how to ask the questions, particularly amongst nursing staff. Professionals were often wary of opening an emotional “can of worms.” Subsequently, patient responses potentially suggesting emotional problems could be

1  
2  
3 prematurely shut down by professionals. Screened patients did not understand why they  
4 were asked questions about depression. This sometimes led to defensive or even defiant  
5 answers to case-finding. Follow up of patients highlighted inconsistent systems and lines of  
6 communication for dealing with screened positive cases.  
7  
8  
9

### 10 11 *Conclusions.*

12  
13  
14 Case-finding does not fit naturally within consultations; both professional and patient  
15 reactions somewhat subverted the process recommended by national guidance. Quality  
16 improvement strategies will need to take account of our results in two ways. First, despite  
17 their apparent simplicity, the case-finding questions are not consultation-friendly, and  
18 acceptable alternative ways to encourage raising the issue of depression need to be  
19 supported. Second, practice teams need clearer guidance on the pathway for people with  
20 likely depression which can be accommodated within available systems and resources.  
21  
22  
23  
24  
25  
26  
27  
28  
29

### 30 **Strengths and limitations of this study**

#### 31 32 **Strengths**

- 33 • Multi-site ethnography of typical general practices
- 34
- 35 • Triangulation through use of multiple sources of data
- 36  
37  
38  
39

#### 40 41 **Limitations**

- 42 • Potential for clinician and patient behaviour to alter as a response to being observed
- 43
- 44 • Short periods of observation in each practice limiting range of types of behaviour
- 45 observed
- 46  
47
- 48 • Observations within one geographical area, thereby potentially limiting
- 49 generalisability
- 50  
51  
52  
53  
54  
55  
56  
57  
58  
59  
60

## Introduction

The detection and management of depression associated with chronic physical illness represents a major challenge for primary care. Depression affects around a third of people with coronary heart disease (CHD) and a quarter of those with diabetes [1-4]. Such co-morbidity can make depression hard to recognize, especially as symptoms of depression (such as fatigue) overlap with those of chronic physical illnesses [5]. Co-morbidity is also associated with poorer outcomes, including mortality. [3 6 7] One response is case finding, screening for depression in populations at high risk, such as those with chronic illness. This has been recommended by national guidance in the UK [8] and elsewhere. [9 10]. The Quality Outcomes Framework (QOF), a pay-for-performance scheme in UK primary care, rewarded depression case finding using two standard screening questions from the Patient Health Questionnaire-2 (PHQ-2) in all patients with coronary heart disease (CHD) or diabetes [11]. The PHQ-2 asks: In past 2 weeks, have you been bothered by: Little interest or pleasure in doing things; and feeling down, depressed or hopeless?[12] Routine data suggested high levels of screening, with a national average of 86% of eligible patients screened in 2011-12 [13].

However, there are problems with both the rationale underpinning this recommendation and the means undertaken to promote its implementation in the UK.

Firstly, there is no evidence that screening for depression by itself improves patient outcomes [14]. For screening to be effective it is important that case finding-detected cases are further assessed, diagnosed and offered appropriate clinical management within a structured clinical pathway [15-17]. There is no closely allied incentive in the QOF programme for subsequent patient care.

Secondly, evidence on the effects of financial incentives on primary care practice is, at best, mixed [18-20]. There are concerns that such incentives undermine professionals' intrinsic motivation, patient-centeredness, and continuity of care and have led to a 'tick box' culture

1  
2  
3 as health professionals work through checklists for chronic illness management [19 21-23].  
4  
5 Health professionals themselves have expressed dissatisfaction with incentivised depression  
6  
7 management [24 25].  
8

9  
10 Our accompanying interrupted time series analysis found that incentivised case finding  
11  
12 increased new depression-related diagnoses in people with diabetes and CHD and  
13  
14 perpetuated rising trends in new prescriptions of antidepressants. [26]. Even though this  
15  
16 incentivised case finding stopped in 2012, there are continuing calls for 'something to be  
17  
18 done' to detect and treat depression in high risk groups [27-29]. However, the professional  
19  
20 and patient experiences of incentivised case finding, how it affected clinical care, and its fit  
21  
22 with the routines of practice life are poorly understood. We investigated the process of  
23  
24 incentivised case finding during scheduled and opportunistic reviews of patients with  
25  
26 diabetes and CHD.  
27  
28  
29

## 30 **Methods**

### 31 *Design and setting*

32  
33 Our ethnographic design combined direct observation with interviews and review of patient  
34  
35 records. We wanted to build an in-depth understanding of how patient case finding was  
36  
37 conducted within the context of everyday practice life and routine patient care. The study  
38  
39 took place in general practices in Leeds, UK.  
40  
41  
42

### 43 *Participants*

44  
45 We invited all practices in Leeds to participate. We then sought a purposive sample of  
46  
47 practices using a four-by-two sampling frame based upon whether practice QOF  
48  
49 achievement was above or below the Leeds median, further stratified by list size and  
50  
51 deprivation profiles. Practices that consented to participate were booked for a week of  
52  
53 observation, during which we aimed to observe at least three consultations.  
54  
55  
56  
57  
58  
59  
60

1  
2  
3 Practices sent letters of invitation and information packs to patients scheduled for chronic  
4 disease reviews within the observation week. We also approached patients attending for  
5 routine consultations to enable observation of opportunistic case finding. Practice staff  
6 identified patients due to be asked the case finding questions and asked if they would be  
7 interested in participating when they arrived at reception for their appointment. All patients  
8 and professionals subsequently observed gave informed consent.

### 15 *Data collection and analysis*

16  
17 An ethnographer (AR) used a funnelling approach to observe and describe the context of  
18 and behaviours within the practice [30], moving to detailed observation and audio-recording  
19 of consultations. Observation considered both verbal and non-verbal features including: how  
20 case finding questions are framed and asked; events leading up to questioning; patient  
21 verbal and non-verbal reactions and responses; and overall style of the consultation. This  
22 style of observation allowed the researcher to layer the analysis of the consultations with  
23 contextual information providing a richer interpretation of the observation data. She held  
24 semi-structured debriefing interviews with patients who had been observed being screened.  
25 The interviews aimed to explore patient views on the process and experience of the  
26 consultation in further depth. We reviewed patients' medical records six weeks after  
27 observed screening to check for any subsequent clinical events related to depression  
28 identification and management.

29  
30 The perceived relative importance and organisation of QOF-related case finding may vary  
31 throughout the year. To partly ameliorate this we observed two practices towards the end of  
32 the financial year when practices are typically working hardest to achieve QOF targets.

33  
34 Transcribed data (interviews, observation transcripts and observation notes) were managed  
35 using NVivo9 and coded for themes. Thematic analysis was undertaken by two researchers,  
36 independently coding for the themes and then comparing codes and themes. The analysis  
37 was further refined by using constant comparison and contrastive approach, and looking for  
38  
39  
40  
41  
42  
43  
44  
45  
46  
47  
48  
49  
50  
51  
52  
53  
54  
55  
56  
57  
58  
59  
60

1  
2  
3 negative cases in order to examine for similarities and differences within and between the  
4 patients' perception and observations in different centres. Finally, to improve reliability and  
5 validity of data, we triangulated findings from all three data sources.  
6  
7  
8

### 9 10 *Ethical review*

11 The study was approved by National Research Ethics Service Committee South West –  
12 Exeter (11/SW/0335).  
13  
14

## 15 16 17 18 **Results**

19  
20 Twelve practices participated and a total of 63 patient consultations were observed (range 2-  
21 13 per practice; Table 1). Practice characteristics were relatively balanced, with five having  
22 QOF achievement above the median for Leeds, five above median population deprivation  
23 scores, and six above median list size. Patients were mostly commonly male, age 51-79  
24 years, and white British (Table 2). Most (79%) participants had diabetes and nine (14%) had  
25 a previous diagnosis of depression. Nine of the observed case findings took place  
26 'opportunistically' within routine GP appointments. The rest occurred within dedicated  
27 chronic disease clinics, usually with nurses.  
28  
29

30  
31 Six key themes emerged: discordance between patient and professional agendas;  
32 professional beliefs affecting how screening was undertaken; case-finding as opening a "can  
33 of worms"; patient existential beliefs affecting their responses; case finding as a means to  
34 reduce stigma; and practice priorities and organisation.  
35  
36

### 37 38 39 40 41 42 43 44 45 46 *Discordance between patient and professional agendas*

47  
48 Case finding exacerbated the discordance between the patient and professional agendas,  
49 the latter already dominated by the need for a tightly structured and time-limited interaction  
50 to document QOF processes. This led to professionals disregarding attempts by patients to  
51 steer the consultation around to their own perceived needs. Patients were often not focused  
52 on the review process and used the consultation as an opportunity to raise other problems.  
53  
54  
55  
56  
57  
58  
59  
60



1  
2  
3 Professionals often interrupted patients or returned the consultation to its purpose,  
4 discounting clues that the patient had worries related to the chronic disease being reviewed  
5 or other illnesses.  
6  
7

8  
9  
10 Patient: [talking about hypoglycaemic attacks] *Only time that I went funny, I had a*  
11 *tooth out and I'd had, I couldn't have any breakfast, or I didn't have any breakfast,*  
12 *because I don't like to be poorly when I've had teeth out, because I used to be when I*  
13 *was younger, am I talking and disturbing....*  
14  
15  
16

17  
18  
19 [Fieldnote] Nurse is trying to measure blood pressure; patient looks agitated.  
20

21  
22 Nurse: *Yes, I think you just probably need to just be quiet for a couple of minutes*  
23 *while I check it, because it's even higher now! We want it to go down! Just try and*  
24 *relax. OK. Observation 29*  
25  
26  
27

28  
29 At this stage in the consultation the patient became distressed, apparently wishing to discuss  
30 further their worries about hypoglycaemia. This illustrates the restrictive context of disease  
31 reviews – in this case hampering further exploration of patient concerns that might have  
32 uncovered associated mood problems.  
33  
34  
35

### 36 37 *Professional beliefs affecting how the case finding was approached*

38  
39 Professional beliefs and abilities affected how case finding was undertaken. They  
40 expressed uncertainty about how best to phrase and ask the questions, particularly nursing  
41 staff who sometimes felt insufficiently trained on how to manage patients who screened  
42 positive. They questioned whether they were case finding for QOF rather than patient benefit.  
43  
44 Professionals avoided directly asking screening questions if they were familiar with patients  
45 but still recorded case finding; they believed could identify mood changes through existing  
46 knowledge of patients. They often adapted the questions to suit their consultation style or  
47 perceived patient needs.  
48  
49  
50  
51  
52  
53  
54  
55  
56  
57  
58  
59  
60

1  
2  
3 Nurse: *Then so do you feel ok about your diabetes, do you have any, do you worry*  
4 *about it, does it bother you at all?* Observation 27  
5  
6

7  
8 Field notes Practice A: [The nurse] referred to QOF as coming from “on high” to tell her  
9 to incorporate it [case-finding]. She felt depression screening was problematic as they  
10 had received “no training” in mental health or in screening and they were very  
11 “stretched for time in the appointment.”  
12  
13  
14

### 15 16 17 *Opening a “can of worms”*

18  
19 Professionals at nearly every practice mentioned the term “can of worms” to express unease  
20 with case finding for depression. This metaphor indicated professional perceptions of both  
21 patient discomfort with being asked about emotions and their own emotional labour in asking  
22 the questions. “Can of worms” helped articulate the belief that case finding for depression  
23 was anticipated as a problematic part of the consultation and threatened to derail routines.  
24 Professionals anticipated having to manage and close down answers before patients began  
25 to give them; this often informed their immediate response to patients’ answers regardless of  
26 what patients said. Patients seldom answered with a simple “yes” or “no” and brought up  
27 specific difficulties, such as bereavement. Following an initial acknowledgement,  
28 professionals then tended to move consultations on without discussing the effects of these  
29 life events on mood. Therefore, professionals prematurely shut down patient responses  
30 suggesting emotional problems to reduce the risk of extended consultations.  
31  
32  
33  
34  
35  
36  
37  
38  
39  
40  
41  
42  
43

44 Nurse: *Are you alright, you haven’t been having little interest in doing things, or?*

45  
46 Patient: *No, no.*

47  
48 Nurse: *Are you fine, are you okay? That’s okay.*

49  
50 Patient: *It’s been 10 years since I’ve lost [woman’s name].*

51  
52 Nurse: *Is it, what, is that your wife?*

53  
54 Patient: *Yes.*  
55  
56  
57  
58  
59  
60

1  
2  
3 Nurse: 10 years? That's a long time, isn't it? Can I just check your tablets then, do  
4 you take aspirin, [lists medication]... Observation 23  
5  
6  
7

#### 8 *Patient existential beliefs affecting responses*

9

10 Many patients screened did not see themselves as the type of people who would be prone to  
11 depression and did not understand why they were asked. This sometimes led to defensive or  
12 even defiant answers, or deflecting questions with humour.  
13  
14  
15

16  
17 Nurse: *So during the past month have you been bothered by feeling down or*  
18 *depressed or hopeless at all?*  
19

20 Patient looks perplexed.  
21

22 Patient: *I'm always...* (His voice cracks and pretends to cry and rub his eyes like a  
23 child) *Am I heck!*  
24  
25  
26

27 Fieldnote: Nurse shuffles in her seat and leans forward. She's smiling but not 100%  
28 comfortable. Observation 24  
29  
30  
31

32 Interviewed patients articulated the belief that the professionals would pick up mood  
33 problems or not coping without the need for such questions. They felt being aware of  
34 depression was important in a generalised context but it did not fit with who they were, and  
35 so found it hard to understand in the context of a chronic disease review.  
36  
37  
38  
39  
40

#### 41 *Case finding as a means to reduce stigma*

42

43 Patients and professionals often considered that regular discussions around mood and  
44 depression helped to reduce associated stigma. Patients were mostly unaware of the  
45 increased prevalence of depression in chronic illness, although felt they understood why it  
46 might occur. They suggested that introducing the case finding questions following an  
47 explanation that depression was more common in chronic illness might facilitate disclosure;  
48 this rarely happened in practice.  
49  
50  
51  
52  
53  
54  
55  
56  
57  
58  
59  
60

1  
2  
3 Researcher: *So when the nurse asks you about your mood... just like I'm trying to*  
4 *imagine your perspective, why do you think that she's asking these questions*  
5 *usually when you get asked?*  
6  
7  
8

9  
10 Patient: *I don't know really, I didn't know whether it was because of my history [of*  
11 *depression] or... I didn't realise that people with heart problems and diabetes get*  
12 *depressed. I suppose if you're not well or you've got on going things with you, I*  
13 *suppose it can depress you."* Interview 44  
14  
15  
16  
17  
18

### 19 *Practice priorities and organisation*

20  
21 Practices varied in how they prioritised and organised case finding for depression. Some  
22 practices devoted a lot of time and energy whilst others considered that some elements of  
23 QOF, such as the depression indicators, required too much effort for too little gain.  
24  
25  
26  
27

28 Field notes, Practice B: This leads to a debate over the decision between QOF  
29 payments and the work put in to achieve those payments. GPs are saying they  
30 should "choose their battles."  
31  
32  
33  
34

35 Five out of 63 patients screened positive; practices subsequently acted on one of these.  
36  
37 Two patients who screened negative subsequently consulted to seek help for mood  
38 problems. Our follow up highlighted inconsistent systems and lines of communication within  
39 practices for dealing with screen-positive patients. Although GPs were aware that nursing  
40 staff undertook case finding, many did not know how a positive screen would be  
41 communicated to them. Nurses assumed that GPs reviewed the case finding outcome when  
42 seeing patients following reviews but this was seldom the case. For example, one patient  
43 who screened positive was asked to return a PHQ9 which indicated moderate depression  
44 symptoms. This was filed without notification to a GP and only picked up on our clinical  
45 record review.  
46  
47  
48  
49  
50  
51  
52  
53  
54  
55  
56  
57  
58  
59  
60

1  
2  
3 Field notes, Practice J: I ask how many patients haven't been screened for  
4 depression in the last 15months. No one knows how to find this out (including the  
5  
6 Practice Manager and the IT guy).  
7  
8  
9

## 10 Discussion

11 Case finding for depression did not naturally fit within primary care consultations. It  
12 appeared to augment discordance between professionals and patients. Professionals  
13 struggled to align case finding with a person-centred approach and were wary of the risk of  
14 patients' emotional issues derailing routine reviews. Professionals believed it was good to  
15 ask about mental health but disliked the structure of the PHQ-2 and feeling forced to add it to  
16 consultations. They subsequently responded by going 'off script' or discounting cues.  
17 Patients sometimes did not understand why the case finding questions were being asked, or  
18 did not see themselves as the type of people prone to depression. This led to defensiveness  
19 or even defiance in their responses, especially if not anticipated as part of their review.  
20 Practice responses to case finding outcomes were haphazard, which may have reflected  
21 professional ambivalence towards depression case finding and the available treatment  
22 options for those identified as having depression.  
23  
24  
25  
26  
27  
28  
29  
30  
31  
32  
33  
34  
35  
36  
37

38 Case finding for depression exemplifies what happens when attempts are made to fit  
39 apparently straightforward but deceptively complex interventions into primary care  
40 consultations and systems. Much has been written about how QOF checklist approaches  
41 have disrupted consultation flows and led to the patient agenda being unheard [31-34]. This  
42 is part of a wider phenomenon. For example, Rousseau *et al* demonstrated how a set of  
43 computerised prompts conflicted with established consultation processes [35]. Such  
44 experience highlights the need for systematic development and evaluation of such  
45 interventions to ensure acceptability and feasibility before wider roll-out [36]. Despite their  
46 apparent simplicity, our study has shown that depression case finding questions were not  
47 implemented consistently within consultations and practice routines.  
48  
49  
50  
51  
52  
53  
54  
55  
56  
57  
58  
59  
60

1  
2  
3 Our findings also help explain the lack of benefit of case finding when it is implemented  
4 outside of collaborative care models [14]. We identified mixed attitudes towards case finding  
5 amongst both professionals and patients, coupled with the absence of agreed pathways for  
6 patient follow-up and management.  
7  
8  
9

10  
11 Study limitations mainly related to the nature of our observations, and sampled practices.

12  
13 We were aware of the intrusive nature of observation and the likelihood that people behaved  
14 differently when under observation. For example, professionals may have made more of an  
15 effort to ask the PHQ2 questions sensitively, or ask them at all. When possible, observation  
16 began following a period of familiarisation to allow the healthcare professional to grow used  
17 to the researcher's presence. A week may also be insufficient to fully understand all practice  
18 processes and relationships; however, similar approaches have produced substantial  
19 insights into healthcare organisational behaviour elsewhere [37]. Even allowing for these  
20 limitations, it is striking how often professionals did deviate from recommended practice.  
21  
22 Professionals and patients are often used to the presence of a third party during  
23 consultations for training purposes, although some of the nurses observed did comment on  
24 feeling under pressure to demonstrate that they were following procedures correctly.  
25  
26  
27  
28  
29

30  
31 The generalizability of our findings may be limited given that this study took place within one  
32 geographical area. However, Leeds is typical of UK cities in terms of social deprivation  
33 indices, demographics, characteristics of primary care services and distribution of common  
34 diseases such as CHD and diabetes [38]. Furthermore, we sampled a relatively diverse  
35 range of practices. Opportunistic case findings were under-represented in our sample of 63  
36 consultations but we did not find any systematic differences from chronic disease review  
37 case findings in our analysis.  
38  
39  
40  
41  
42  
43  
44  
45  
46  
47  
48  
49  
50

51  
52 We identified a range of problems with incentivised screening for depression. Our  
53 accompanying interrupted time series analysis indicates that incentivised case finding did  
54 change clinical behaviour, increasing new depression-related diagnoses and, compared with  
55  
56  
57  
58  
59  
60

1  
2  
3 untargeted patients with chronic illness, perpetuated increasing rates of antidepressant  
4 prescribing [26]. It is difficult to predict with any confidence whether greater changes would  
5 have occurred if case finding had been applied with greater fidelity. However, our findings  
6 have broader implications for efforts to improve detection of depression in people with  
7 chronic illness.  
8  
9

10  
11 Specifically, all of patients, professionals and healthcare systems need to be prepared in  
12 advance of case finding. Firstly, for patients, experience with the diagnostic disclosure of  
13 illnesses such as dementia and cancer suggests that acceptance is facilitated by a series of  
14 negotiated steps rather than a 'one-off' process [39 40]. For example, patients in our study  
15 indicated they would have been more receptive to case finding had they received information  
16 beforehand about the higher prevalence of depression in chronic physical illness. It is also  
17 possible that the act of case finding does form an initial step in helping patients consider and  
18 come to terms with a diagnosis of depression, given that we found screen negative patients  
19 subsequently consulted with mood problems. Secondly, professional attitudes towards and  
20 skills required in the detection of depression need to be examined. Some voiced unease  
21 about whether they were incorporating the questions correctly within consultations or  
22 uncertainty about how to handle potential new diagnoses, particularly nursing staff. Thirdly,  
23 resources and care pathways need to be optimised to accommodate detection and follow up.  
24 Those who screen positive are more likely to have mild-moderate rather than severe  
25 depression and less likely to benefit from antidepressant treatment [41 42]. Resources are  
26 needed to manage those identified through case finding recommended by clinical guidelines.  
27 Health professionals were understandably reluctant to open up a "can of worms" during  
28 tightly restricted chronic illness reviews; the exploration of sensitive issues requires greater  
29 flexibility in consultation time. We also found instances where screen-positives were not  
30 acted upon given the absence of explicitly agreed pathways within practices.  
31  
32  
33  
34  
35  
36  
37  
38  
39  
40  
41  
42  
43  
44  
45  
46  
47  
48  
49  
50  
51  
52  
53

54  
55 There are more general lessons beyond depression detection. Mood disorders are not the  
56 only sensitive issue raised during chronic illness reviews. Our findings should prompt a  
57  
58  
59  
60

reappraisal of how such reviews are designed and implemented for other emotionally-laden problems integral to chronic illness care, such as weight management, sexual dysfunction and alcohol misuse [43]. Health professionals may welcome structured protocols to help ensure coverage of key issues; there is evidence that prompting interventions have a small to modest effect on practice and patient outcomes [44]. However, such approaches have been less successful in addressing relatively complex clinical behaviours, especially for chronic illness management [45]. The subsequent challenge for quality improvement programmes and research is to further explore and evaluate how to develop interventions which can be embedded within primary care systems and consultations to improve population outcomes whilst preserving patient-centred care.

Incentivised case finding exacerbated tensions between perceived patient centredness and the time-limited routine of the consultation. Both professionals and patients reacted to the imposition of case finding by adapting, or even subverting, the process recommended by national guidance. Despite their apparent simplicity, the case finding questions are not consultation-friendly, and acceptable alternative ways to raise mood disorders merit further exploration. Practice teams need clearer guidance on the pathway for people with likely depression which can be accommodated within available systems and resources.

|                                                                                                                                                                                                                                                                                                                                           |
|-------------------------------------------------------------------------------------------------------------------------------------------------------------------------------------------------------------------------------------------------------------------------------------------------------------------------------------------|
| <b>What is already known on this topic</b>                                                                                                                                                                                                                                                                                                |
| <ul style="list-style-type: none"><li>• Case-finding for depression was incentivised in UK primary care to increase depression diagnosis and management.</li><li>• Evidence that case-finding has improved depression outcomes is lacking and health care professionals have expressed dissatisfaction with its implementation.</li></ul> |
| <b>What this study adds</b>                                                                                                                                                                                                                                                                                                               |
| <ul style="list-style-type: none"><li>• Patients and health care professionals subverted the standardised process of depression case-finding to suit their consultation style and needs.</li></ul>                                                                                                                                        |



- Practices need clear guidance on how to include mental health discussions within consultations and pathways for those identified as through case-finding.

### **Ethics Approval**

This study was approved by the South West - Exeter Research Ethics Committee (reference 11/SW/0335). The participants gave informed consent before taking part.

### **Funding**

This paper summarises independent research funded by the National Institute for Health Research (NIHR) under its Research for Patient Benefit (RfPB) Programme (Grant Reference Number PB-PG-0110-21046). The views expressed are those of the authors and not necessarily those of the NHS, the NIHR or the Department of Health. Study sponsors, the University of Leeds, and NIHR RfPB had no role in study design, in the collection, analysis and interpretation of data, in the writing of the report, and in the decision to submit the article for publication. All authors had full access to all of the data in the study and can take responsibility for the integrity of the data and the accuracy of the data analysis.

### **Transparency Declaration**

Dr Sarah L Alderson, the lead author (the manuscript's guarantor), affirms that the manuscript is an honest, accurate, and transparent account of the study being reported; that no important aspects of the study have been omitted; and that any discrepancies from the study as planned have been explained.

### **Data sharing statement**

Data sharing: no additional data available.

### **Contributorship Statement**

1  
2  
3 RF and AH conceived the project. RF was principal investigator. SA and KM designed the  
4 study. SA and AR were responsible for running the project. AR was responsible for data  
5 collection. All authors interpreted the data and findings. SA wrote the first draft of the  
6 manuscript. RF commented on the first draft and all authors commented on further revisions.  
7  
8 SA is guarantor of the paper.  
9  
10  
11  
12

### 13 14 **Competing interests**

15  
16  
17 All authors received funding from National Institute of Health Research to undertake this  
18 study.  
19  
20

### 21 **References**

- 22  
23  
24 1. Goldney RD, Phillips PJ, Fisher LJ, Wilson DH. Diabetes, Depression, and Quality of Life. *Diabetes*  
25 *Care* 2004;**27**(5):1066-70 doi: 10.2337/diacare.27.5.1066[published Online First: Epub Date]].  
26  
27 2. Rudisch B, Nemeroff CB. Epidemiology of comorbid coronary artery disease and depression.  
28 *Biological Psychiatry* 2003;**54**(3):227-40  
29  
30 3. Carney RM, Freedland KE, Miller GE, Jaffe AS. Depression as a risk factor for cardiac mortality and  
31 morbidity: A review of potential mechanisms. *Journal of Psychosomatic Research*  
32 2002;**53**(4):897-902  
33  
34 4. Anderson RJ, Freedland KE, Clouse RE, Lustman PJ. The Prevalence of Comorbid Depression in  
35 Adults With Diabetes: A meta-analysis. *Diabetes Care* 2001;**24**(6):1069-78 doi:  
36 10.2337/diacare.24.6.1069[published Online First: Epub Date]].  
37  
38 5. Simon GE, VonKorff M. Recognition, management, and outcomes of depression in primary care.  
39 1995(2):99-105  
40  
41 6. Barth J, Schumacher M, Herrmann-Lingen C. Depression as a Risk Factor for Mortality in Patients  
42 With Coronary Heart Disease: A Meta-analysis. *Psychosom. Med.* 2004;**66**(6):802-13 doi:  
43 10.1097/01.psy.0000146332.53619.b2[published Online First: Epub Date]].  
44  
45 7. Katon W, Ciechanowski P. Impact of major depression on chronic medical illness. *Journal of*  
46 *Psychosomatic Research* 2002;**53**(4):859-63  
47  
48 8. National Institute of Clinical Excellence. Depression in adults with a chronic physical health  
49 problem: treatment and management. NICE. : NICE, 2009.  
50  
51 9. New Zealand Guidelines Group. Identification of Common Mental Disorders and Management of  
52 Depression in Primary Care. An Evidence-based Best Practice Guideline. Wellington, 2008.  
53  
54 10. US Preventative Services Task Force. Screening for Depression in Adults: U.S. Preventive Services  
55 Task Force Recommendation Statement. *Annals of Internal Medicine* 2009;**151**(11):784-92  
56 doi: 10.1059/0003-4819-151-11-200912010-00006[published Online First: Epub Date]].  
57  
58 11. University of Birmingham and University of York Health Economics Consortium. NM49 indicator  
59 development feedback report 2012.  
60  
12. BMJ Best Practice. Screening: Patient Health Questionnaire-2 (PHQ-2). BMJ Best Practice 2010.  
<http://bestpractice.bmj.com/best-practice/monograph/55/prevention.html>.  
13. Health and Social Care Information Centre. Quality Outcomes Framework 2012/13 results.  
Secondary Quality Outcomes Framework 2012/13 results 2013.  
<http://qof.hscic.gov.uk/index.asp>.

14. Gilbody S, Sheldon T, House A. Screening and case-finding instruments for depression: a meta-analysis. *Canadian Medical Association Journal* 2008;**178**(8):997-1003 doi: 10.1503/cmaj.070281[published Online First: Epub Date]].
15. Dowrick C, Buchan I. Twelve month outcome of depression in general practice: does detection or disclosure make a difference? *BMJ* 1995;**311**(7015):1274-76
16. Gilbody SM, House A, Sheldon T. Screening and case finding instruments for depression [Systematic Review]. *Cochrane Database of Systematic Reviews* 2009;**3**:3
17. Pignone MP, Gaynes BN, Rushton JL, et al. Screening for Depression in Adults: A Summary of the Evidence for the U.S. Preventive Services Task Force. *Annals of Internal Medicine* 2002;**136**(10):765-76 doi: 10.7326/0003-4819-136-10-200205210-00013[published Online First: Epub Date]].
18. Serumaga B, Ross-Degnan D, Avery A, et al. Effect of pay for performance on the management and outcomes of hypertension in the United Kingdom: interrupted time series study. *BMJ* 2011;**342**:d108
19. Campbell SM, Reeves D, Kontopantelis E, Sibbald B, Roland M. Effects of Pay for Performance on the Quality of Primary Care in England. *N Engl J Med* 2009;**361**:368-78
20. Scott A, Sivey P, Ait Ouakrim D, et al. The effect of financial incentives on the quality of health care provided by primary care physicians. *Cochrane Database Syst Rev* 2011(9):CD008451
21. Checkland K, Harrison S, McDonald R, Grant S, Campbell SM, Guthrie B. Biomedicine, holism and general medical practice: responses to the 2004 General Practitioner contract. *Sociology of Health and Illness* 2008;**30**:788-803
22. McDonald R, Harrison S, Checkland K, Campbell S, Roland M. Impact of financial incentives on clinical autonomy and internal motivation in primary care: ethnographic study. *BMJ* 2007;**334**(7608):1333-34
23. Maisey S, Steel N, Marsh R, Gillam S, Fleetcroft R, Howe A. Effects of payment for performance in primary care: qualitative interview study. *Journal of Health Services Research & Policy* 2008;**13**(3):133-39 doi: 10.1258/jhsrp.2008.007118[published Online First: Epub Date]].
24. Mitchell C, Dwyer R, Hagan T, Mathers N. Impact of the QOF and the NICE guideline in the diagnosis and management of depression: a qualitative study. *Br. J. Gen. Pract.* 2011;**61**(586):e279-e89 doi: 10.3399/bjgp11X572472[published Online First: Epub Date]].
25. Coventry PA, Hays R, Dickens C, et al. Talking about depression: a qualitative study of barriers to managing depression in people with long term conditions in primary care. *BMC Fam Pract* 2011;**12**:10 doi: 10.1186/1471-2296-12-10[published Online First: Epub Date]].
26. McLintock K, Russell A, West R, et al. Effect of financial incentives on screening for depression in patients with chronic disease in the United Kingdom: an interrupted time series study. Manuscript in preparation 2013
27. Practitioners RCoG. Supporting Carers: An action guide for general practitioners and their teams.: Royal College of General Practitioners, 2011.
28. Burden AD, Boon MH, Leman J, Wilson H, Richmond R, Ormerod AD. Diagnosis and management of psoriasis and psoriatic arthritis in adults: summary of SIGN guidance. *BMJ* 2010;**341** doi: 10.1136/bmj.c5623[published Online First: Epub Date]].
29. Collier F, Smith RC, Morton CA. Diagnosis and management of hidradenitis suppurativa. *BMJ* 2013;**346** doi: 10.1136/bmj.f2121[published Online First: Epub Date]].
30. Emerson RM, Fretz RI, Shaw LL. *Writing ethnographic fieldnotes*. 2nd ed: University of Chicago Press, 2011.
31. Chew-Graham CA, Hunter C, Langer S, et al. How QOF is shaping primary care review consultations: a longitudinal qualitative study. *BMC Fam Pract* 2013;**14**(1):103
32. Campbell SM, McDonald R, Lester H. The experience of pay for performance in English family practice: a qualitative study. *Annals of Family Medicine* 2008;**6**(3):228-34

- 1  
2  
3 33. Hannon KL, Lester HE, Campbell SM. Patients' views of pay for performance in primary care: a  
4 qualitative study. *Br. J. Gen. Pract.*; **62**(598):e322-e28 doi: 10.3399/bjgp12X641438[published  
5 Online First: Epub Date]].
- 6 34. Lester H, Matharu T, Mohammed MA, Lester D, Foskett-Tharby R. Implementation of pay for  
7 performance in primary care: a qualitative study 8 years after introduction. *Br. J. Gen. Pract.*  
8 2013;**63**(611):e408-e15 doi: 10.3399/bjgp13X668203[published Online First: Epub Date]].
- 9 35. Rousseau N, McColl E, Newton J, Grimshaw J, Eccles M. Practice based, longitudinal, qualitative  
10 interview study of computerised evidence based guidelines in primary care. *BMJ*  
11 2003;**326**(7384):314 doi: 10.1136/bmj.326.7384.314[published Online First: Epub Date]].
- 12 36. Craig P, Dieppe P, Macintyre S, Michie S, Nazareth I, Petticrew M. Developing and evaluating  
13 complex interventions: the new Medical Research Council guidance. *BMJ* 2008;**337** doi:  
14 10.1136/bmj.a1655[published Online First: Epub Date]].
- 15 37. Dixon-Woods M, Leslie M, Bion J, Tarrant C. What Counts? An Ethnographic Study of Infection  
16 Data Reported to a Patient Safety Program. *Milbank Quarterly* 2012;**90**(3):548-91 doi:  
17 10.1111/j.1468-0009.2012.00674.x[published Online First: Epub Date]].
- 18 38. Public Health England. National General Practice Profiles - Leeds PCT. Secondary National  
19 General Practice Profiles - Leeds PCT 2013.  
20 [http://www.apho.org.uk/PracProf/Profile.aspx#mod,2,pyr,2012,pat,2,par,E16000074,are,-](http://www.apho.org.uk/PracProf/Profile.aspx#mod,2,pyr,2012,pat,2,par,E16000074,are,-sid1,2000002,ind1,243-4,sid2,2000005,ind2,-)  
21 [sid1,2000002,ind1,243-4,sid2,2000005,ind2,-](http://www.apho.org.uk/PracProf/Profile.aspx#mod,2,pyr,2012,pat,2,par,E16000074,are,-sid1,2000002,ind1,243-4,sid2,2000005,ind2,-).
- 22 39. Fallowfield L, Jenkins V. Effective communication skills are the key to good cancer care. *European*  
23 *journal of cancer (Oxford, England : 1990)* 1999;**35**(11):1592-7
- 24 40. Lecouturier J, Bamford C, Hughes J, et al. Appropriate disclosure of a diagnosis of dementia:  
25 identifying the key behaviours of 'best practice'. *BMC Health Services Research* 2008;**8**(1):1-  
26 10 doi: 10.1186/1472-6963-8-95[published Online First: Epub Date]].
- 27 41. Coyne JC, Schwenk TL, Fechner-Bates S. Nondetection of depression by primary care physicians  
28 reconsidered. *General Hospital Psychiatry* 1995;**17**(1):3-12 doi:  
29 [http://dx.doi.org/10.1016/0163-8343\(94\)00056-J](http://dx.doi.org/10.1016/0163-8343(94)00056-J)[published Online First: Epub Date]].
- 30 42. Arroll B, Goodyear-Smith F, Crengle S, et al. Validation of PHQ-2 and PHQ-9 to screen for major  
31 depression in the primary care population. *Ann Fam Med* 2010;**8**(4):348-53 doi:  
32 10.1370/afm.1139[published Online First: Epub Date]].
- 33 43. Crosson JC, Heisler M, Subramanian U, et al. Physicians' Perceptions of Barriers to Cardiovascular  
34 Disease Risk Factor Control among Patients with Diabetes: Results from the Translating  
35 Research into Action for Diabetes (TRIAD) Study. *The Journal of the American Board of*  
36 *Family Medicine* 2010;**23**(2):171-78 doi: 10.3122/jabfm.2010.02.090125[published Online  
37 First: Epub Date]].
- 38 44. Shojania Kaveh G, Jennings A, Mayhew A, Ramsay Craig R, Eccles Martin P, Grimshaw J. The  
39 effects of on-screen, point of care computer reminders on processes and outcomes of care.  
40 *Cochrane Database of Systematic Reviews* 2009; (3).  
41 <http://onlinelibrary.wiley.com/doi/10.1002/14651858.CD001096.pub2/abstract>.
- 42 45. Grimshaw JM, Eccles MP, Lavis JN, Hill SJ, Squires JE. Knowledge translation of research findings.  
43 *Implementation Science* 2012;**7**(50):1-29  
44  
45  
46  
47  
48  
49  
50  
51  
52  
53  
54  
55  
56  
57  
58  
59  
60

Table 1 – Observed practice characteristics

| Surgery    | QOF score* | List Size* | Deprivation Score* | Patients Recruited |
|------------|------------|------------|--------------------|--------------------|
| Practice A | Low        | Low        | Low                | 3                  |
| Practice B | Low        | High       | High               | 13                 |
| Practice C | Low        | High       | Low                | 5                  |
| Practice D | High       | High       | Low                | 6                  |
| Practice E | High       | High       | High               | 6                  |
| Practice F | High       | Low        | High               | 5                  |
| Practice G | Low        | High       | Low                | 5                  |
| Practice H | Low        | Low        | Low                | 5                  |
| Practice I | High       | High       | Low                | 4                  |
| Practice J | Low        | Low        | High               | 5                  |
| Practice K | Low        | Low        | High               | 4                  |
| Practice L | High       | Low        | Low                | 2                  |

\* Compared to Primary Care Trust median

Table 2 - Patient demographics in observed consultations

|                                                | <u>No. of patients</u> | <u>% of patients</u> |
|------------------------------------------------|------------------------|----------------------|
| <b><u>Gender</u></b>                           |                        |                      |
| Female                                         | 21                     | 33%                  |
| Male                                           | 42                     | 67%                  |
| <b><u>Age group</u></b>                        |                        |                      |
| 18-30                                          | 7                      | 11%                  |
| 31-50                                          | 5                      | 8%                   |
| 51-64                                          | 18                     | 29%                  |
| 65-79                                          | 28                     | 44%                  |
| 80+                                            | 5                      | 8%                   |
| <b><u>Chronic Illness</u></b>                  |                        |                      |
| CHD                                            | 13                     | 21%                  |
| DM                                             | 46                     | 73%                  |
| CHD & DM                                       | 4                      | 6%                   |
| <b><u>Ethnicity</u></b>                        |                        |                      |
| White British                                  | 49                     | 78%                  |
| Mixed British                                  | 1                      | 2%                   |
| White Irish                                    | 2                      | 3%                   |
| Chinese                                        | 1                      | 2%                   |
| Black Caribbean                                | 5                      | 8%                   |
| Pakistani                                      | 3                      | 5%                   |
| British Asian                                  | 1                      | 2%                   |
| Indian                                         | 1                      | 2%                   |
| <b><u>Previous diagnosis of depression</u></b> |                        |                      |
| Yes                                            | 9                      | 14%                  |
| No                                             | 54                     | 86%                  |

# Evaluation of screening for depression in patients with coronary heart disease and/or diabetes in Primary Care

## Background:

Depression frequently co-occurs with chronic physical illness, with estimated prevalences of 33% in CHD and 24% in diabetes.(1, 2) This co-morbidity can complicate the recognition of depression.(3, 4) Concurrent depression can worsen the prognosis of both conditions, possibly through biological factors such as neuro-endocrine or autonomic dysfunction, psychological factors such as reduced tolerance and concordance with treatment plans.(2, 5) or behavioural factors such as failure to stop smoking or low physical activity levels. It is therefore important to recognize and respond to co-occurring depression systematically.(6)

The high prevalence of depression in those suffering from chronic physical illness has been recognised in recommendations to 'consider' the diagnosis of depression within, amongst others, NICE clinical guidelines for chronic heart failure, COPD and Parkinson's Disease.(7-9) But studies suggest usual care by GPs fails to recognise between 30% and 50% of depressed patients.(10) Consequently, systematic screening has been advocated as a means of improving detection, treatment and outcomes of depression in adults (11) and in those with chronic illness.(12, 13) New Improving Access to Psychological Therapies guidelines identify people with chronic illness as a key priority area requiring better access to psychological therapies because of the documented comorbidity of depression and long-term physical health conditions (25).

Screening for depression in patients with diabetes and/or heart disease using two standard screening questions from the Patient Health Questionnaire-2 (PHQ-2) was introduced as a new QOF clinical indicator (DEP1) from 2006-7.(14) Practices receive graded payments in return for meeting targets related to this and other indicators.(15) The PHQ-2 compares well with other established assessment and screening instruments.(16)

Although practice achievements in the QOF depression domain are high, with a national average of 93% of eligible patients screened in 2008-9,(17) current evidence indicates that screening for depression in primary care does not in fact improve detection of emotional disorders or improve outcomes for the majority of patients when used in isolation.(18, 19) For screening approaches to be effective it is important that screen-detected cases are further assessed, diagnosed and offered appropriate clinical management.(6) The QOF does not incentivise this and one small single-practice audit suggests that it is not happening in routine practice.(20) Levels of depression detected in patients with chronic physical illness, following

1  
2  
3 PHQ-2 screening, are far lower than expected when compared with published  
4 prevalence statistics.(1, 2, 20)  
5

6 There is a need for a more robust evaluation of the current QOF driven screening for  
7 depression to evaluate its true impact upon depression detection and treatment. If,  
8 as seems likely, the current screening initiative is not working as intended then we  
9 need to understand why: it may reflect a combination of professional and patient  
10 ambivalence to depression screening, the context in which screening takes place or  
11 how it fits in with other aspects of clinical care.(21)  
12  
13

14 We are presently conducting a number of related projects evaluating screening for  
15 depression associated with chronic physical illness. We are conducting a systematic  
16 review of qualitative studies to explore how people with depressive symptoms  
17 understand depression and interviewing patients with chronic physical illness to  
18 examine their understanding of depression. These will help us understand the  
19 patient perspective. We are also conducting a systematic review examining primary  
20 care professionals' attitudes to screening for depression and then interviewing  
21 primary care professionals. These will help us understand the professional  
22 perspective. However, our understanding will be incomplete until we examine the  
23 process and impact of screening for depression in chronic physical illness in primary  
24 care. Hence, we are conducting ethnographic work to examine the process of  
25 screening and quasi-experimental work to examine its impact. This protocol is  
26 concerned with the former.  
27  
28  
29  
30  
31

### 32 **Aim and hypotheses:**

33 This is qualitative inductive type of research and as such is not based on  
34 hypotheses.  
35  
36

#### 37 **Primary aim:**

- 38 - To evaluate screening for depression associated with a chronic physical  
39 illness (diabetes and CHD) undertaken for QOF, and its relation to  
40 subsequent clinical management of patients with depression.  
41  
42
- 43 - To investigate the process of depression screening during routine patient  
44 reviews as perceived by the patients themselves  
45  
46

#### 47 **Secondary aims:**

- 48 - How does the context and purpose of the chronic illness review for diabetes  
49 or CHD affect the process of screening for depression?  
50  
51
- 52 - How engaged are patients and healthcare professionals with the process of  
53 screening?  
54  
55
- 56 - What factors act as barriers to, and which factors promote thorough and  
57 comprehensive screening process?  
58



- 1  
2  
3 - How do the experiences and outcomes of screening influence any  
4 subsequent clinical action?  
5  
6 - How do (this will be done in PhD research) patients perceive the screening  
7 process and what are their recommendation for improving it?  
8  
9 - Please note that Interviewing healthcare professionals on their experiences of and  
10 views on depression screening will also be done, but these interviews form part of  
11 further studies and are not a part of this research.  
12

13 This study will inform the development of effective strategies to detect and treat  
14 depression associated with chronic physical illness.  
15

## 16 **Method:**

### 17 **Inclusion and exclusion criteria:**

#### 18 **Inclusion criteria:**

- 19  
20  
21  
22  
23 1. Being diagnosed with chronic physical illness (diabetes and/or CHD)  
24 2. Willing and able to comply with requirements of this study protocol  
25 3. Written informed consent obtained to participate in this study  
26  
27  
28

#### 29 **Exclusion criteria:**

- 30  
31 1. Decline participation in this study  
32 2. Unable to comply with requirements of this study protocol  
33  
34

#### 35 **Design:**

36 A qualitative study involving observation of patient and professional interaction  
37 during screening for depression. Semi-structured debriefing interviews will be held  
38 with the patients, exploring the process and experience of the consultation in further  
39 depth. Patients' medical records will be reviewed after consent has been gained from  
40 patients to obtain further information on patient characteristics which will be used to  
41 contextualise and aid interpretation of findings.  
42  
43  
44

#### 45 **Sampling:**

46 A purposive sample of practices within NHS Leeds will be identified, using a 4x2  
47 sampling frame based upon practices with high and low QOF achievements in the  
48 DEP1 domain (highest and lowest quartiles), further stratified by list size, deprivation  
49 profiles (above and below median), and practice arrangements for chronic illness  
50 reviews (dedicated nurse-run clinics versus other arrangements for planned  
51 reviews). With two practices in each of 8 cells we will aim to recruit 16 practices.  
52  
53  
54

55 If recruitment numbers permit we will attempt to stratify this sample further by looking  
56 at different demographic and clinical characteristics. As ethnic minority patients are  
57  
58

1  
2  
3 disproportionately affected by long term conditions (such as diabetes and CHD) and  
4 related depression (22), we will recruit them purposively if necessary. For those who  
5 are not fluent in English, the patient information sheet and consent forms will be  
6 translated into the relevant languages (for example Gujarati, Urdu and/or Hindi), and  
7 an interpreter will assist in the debriefing interviews.  
8  
9

### 10 **Sample Size:**

11  
12 Up to 16 practices, and up to 48 observations within those practices or until  
13 saturation is reached (24).  
14

### 15 **Recruitment:**

16  
17 All practices in NHS Leeds will be invited to take part in the study. Practice profile  
18 data will be sought from NHS and publicly available resources (e.g. The NHS  
19 Information Centre: QOF online results database). They will be recruited through the  
20 West Yorkshire Primary Care Research Network research ready practice list and by  
21 contacting other practices individually by letter. Non-respondents will be contacted  
22 again by telephone and letter to maximise recruitment. Interested practices will be  
23 visited by the research team to discuss involvement in the project. Funding has been  
24 arranged to compensate practices for the time needed to explain the project as well  
25 as for undertaking the project.  
26  
27  
28

29 Phase one of patient recruitment will begin after practices consent to participate. The  
30 letters of invitation (on practice headed paper) and patient information packs, with  
31 researchers' contact details for further information, will be sent by patients' GP to  
32 relevant patients prior to their planned chronic illness reviews.  
33  
34

35 Practice-level consent for observations and patient-level consent will be obtained.  
36 Patients who have reviews booked by other means (telephone, by the patient) will be  
37 informed of the potential observation when they arrive for their review, or by the  
38 practice team when pre-booking appointments. On the day of observations, when  
39 the patient books in for their appointment they will be asked at the practice reception if  
40 they are interested in participating in the study. Those patients interested in  
41 participation will be referred to the researcher and will again have opportunity to ask  
42 questions about the research. If they still agree, written consent will be taken by the  
43 appropriately trained researcher.  
44  
45  
46

47 The second phase of recruitment will take place for patients who are due to be asked  
48 their PHQ-2 screening questions but are not attending a scheduled routine  
49 screening. These patients will be identified by practice staff and asked if they would  
50 be interested in participating when they arrive at reception for their appointments. If  
51 they are interested they will be referred to the researcher who will consent them into  
52 the research.  
53  
54

55 Standard ethical safeguards will apply, e.g. ensuring that undue pressure is not  
56 exerted upon patients to participate and allowing them to decline after interview  
57  
58

1  
2  
3 when consent will be asked for again to ensure they are willing to participate (26).  
4 Patients will be reminded before observation, before interview and after interview  
5 that they are free to withdraw at any time without giving a reason. We will work with  
6 our Patient Advisory Panel (see below) and consult with practices to refine these  
7 recruitment methods, information packs and consent forms.  
8  
9

### 10 **Observation:**

11  
12 Screening forms part of the routine chronic illness review for diabetes and CHD in  
13 primary care, usually scheduled within nurse-led clinics. A researcher will observe  
14 the consultation in person. Observation will consider both verbal and non-verbal  
15 features including; how case finding questions are framed and asked, events leading  
16 up to questioning, patient verbal and non-verbal reactions and responses, and  
17 overall style of the consultation (e.g. friendly, formal). The main data source of  
18 observations will be detailed notes taken by the observer. With participants'  
19 permission, we intend to make digital audio-recordings of consultations.  
20  
21

22  
23 We have considered other means of trying to investigate consultations but have  
24 opted for direct observation on the grounds that it is (a) a standard ethnographic  
25 technique which allows the researcher to capture both verbal and non-verbal signals,  
26 (b) by observing verbal and non-verbal clues and participating in the process of  
27 meaning production between professional and the patient during the consultation  
28 process, the observer is able to capture explicit and implicit meanings of consultation  
29 in great depths; and (c) the observer is not grounded either in the professional's or  
30 the patient's perspective and therefore potentially provides a more detached  
31 perspective of the consultation. We are aware of the intrusive nature of observation  
32 and that people behave differently when observed (e.g. professionals may make  
33 more of an 'effort' to ask the PHQ2 questions sensitively). We can ameliorate the  
34 effects of being observed for professionals by having a 'run-in' period of  
35 familiarisation at each practice. Furthermore, the presence of a third party in  
36 consultations is often acceptable to patients in training or routine care. Immediately  
37 following observation, the researcher will briefly speak with the GP or nurse who has  
38 conducted the check-up about their reflections on the check-up. This will allow a  
39 representation of the opinions of all of the individuals in the check up to form part of  
40 the research.  
41  
42

43  
44 The observations, digital recordings of consultations and (digitally recorded  
45 interviews) will be entered in a computer file in a secure computer network as soon  
46 as possible. Paper copies and digital recordings of the observations and taped  
47 interviews will be destroyed.  
48  
49  
50  
51  
52

### 53 **Interviews:**

54  
55 Following observation, the researcher will conduct separate debriefing interviews  
56 with patients at a private place at the surgery ideally on the day of their appointment,  
57  
58

1  
2  
3 or within 3 days at a place named by patients. The semi-structured interview will be  
4 based on a pre- agreed interview guide. The interviews will last approximately 30  
5 minutes and will be taped with participants' permission prior to verbatim transcription.  
6 At the start of the interview patients will give verbal consent to participate which will  
7 be audiorecorded. They will be reminded they can withdraw from the study during or  
8 after the interview without giving a reason and that this will not affect their  
9 healthcare. After the interview the patient will be asked again if they consent to be  
10 part of the research and will be asked to sign the second part of the consent form.  
11 They will be reminded they can withdraw at any time without giving a reason.  
12

13 Patient notes will be accessed by the researcher 4-6 weeks after the observation to  
14 determine if any follow up from the screening took place with consent from the  
15 patient.  
16

### 17 **Analysis:**

18 Observation notes will be typed in computer files. The audiotapes of consultation  
19 conversations, and patient interviews will be transcribed verbatim and anonymised.  
20 Transcribed data (interviews and observation notes) will be managed with help of  
21 NVivo. All transcripts will be read and re-read to ensure familiarity with the data.  
22

23 Data (i.e. observation notes, consultation and interview data) will be coded for  
24 themes. Interviews in the languages other than English will be professionally  
25 translated. Thematic analysis will be undertaken by two researchers independently  
26 coding for the emerging themes and then compare codes and themes. The analysis  
27 will be further refined by using constant comparison and contrastive approach, and  
28 looking for negative cases in order to examine for similarities and differences within  
29 and between the patients' perception and observations in different centres. Finally, to  
30 improve reliability and validity of data, findings will be triangulated from all three data  
31 sources.  
32

### 33 **Ethical issues:**

#### 34 **Potential distress**

35 Recent evidence suggests that qualitative interviewing, even when using  
36 unstructured interview guides (i.e. those which are not pre-approved by the ethics  
37 committees) does not have long-term negative effect which would require  
38 psychological treatment. In fact, the participants are far more likely to experience  
39 relief after discussing distressing experiences.(23) However, it is nevertheless  
40 possible that the participants will experience distress talking about their illness. To  
41 address this issue we will make sure that the researcher working on the study will  
42 have considerable experience in qualitative research in healthcare and working with  
43 vulnerable patient populations and (s)he will be able to handle these issues  
44 sensitively.  
45  
46  
47  
48  
49  
50  
51  
52  
53  
54  
55  
56  
57  
58

1  
2  
3 If the researcher is not able to address participant's distress then the patient will be  
4 referred to GP and/or appropriate services. It is also possible that a researcher will  
5 estimate that the participant might be depressed and need help even when routine  
6 review and screening have not detected increased distress. In such case the  
7 researcher will alert GP. This will be made clear in the PIL.  
8  
9

### 10 **Confidentiality**

11  
12 We will be mindful of protecting participant confidentiality at all times. The paper  
13 copies of the observations and all digital recordings will be immediately destroyed  
14 after transcription. During transcription all the personal data in the transcripts will be  
15 removed and/ or anonymised so the participants' identity will be protected. The  
16 participants will be only referred to by their study number which will bear no  
17 resemblance to their identity, NHS number, DOB or similar.  
18  
19

20 Any paper documents (e.g. consent forms) and any information about the participant  
21 will be kept in a locked drawer in a locked office. All electronic information will be  
22 stored on the University of Leeds' computers which are password protected. The file  
23 in which codes are linked to patients' names will only be stored on a password  
24 protected computer in a secure network.  
25  
26

27 Even though we will protect participant confidentiality at all times we will make clear  
28 to the participants in the PIL that we do have duty of care towards them. This means  
29 that if a researcher believes that a patient might be a danger to himself or herself  
30 (e.g. suicide ideation) or others we are obliged to alert appropriate services.  
31  
32

33 Furthermore, we are aware that some patients might discuss circumstances of  
34 potential disagreements, conflicts or tensions with their healthcare providers. In order  
35 to protect the anonymity of such participants who will continue to see these  
36 professionals but might get identified by such incidents and circumstances, we will  
37 take further care to protect their anonymity. We will also take care not to disclose  
38 what the professionals might have said about the patients and vice versa.  
39  
40

### 41 **Informed consent**

42  
43 The patients will be required to sign a consent form prior to getting involved to the  
44 study. Time will be allocated prior to the observation for patient information sheets to  
45 be read to and explained to patients if necessary. Those unable to consent for  
46 themselves will be excluded from participating. Funding is available for interpretation  
47 services for those who do not have adequate command of English. Patients will be  
48 able to withdraw from the research without giving a reason at any time.  
49  
50

### 51 **Lone worker policy**

52  
53 Briefing interviews are being conducted on a one-to-one basis between a participant  
54 and the researcher. As the participants can choose the time and place of the  
55 interview and can opt to being interviewed at their own homes, there is some risk to  
56  
57  
58

1  
2  
3 the researcher. For this reason the researcher from University of Leeds will follow  
4 University's "Lone worker" policy.  
5  
6

### 7 **Dissemination and policy relevance:**

8  
9 This research will contribute to knowledge about the patients' experience of  
10 identification of depression associated with chronic physical disease, an area that is  
11 not fully understood at the moment. Information gathered from this study, along with  
12 the preceding literature reviews and qualitative interview studies, will enable targeted  
13 interventions that may increase the patients' engagement in depression screening  
14 and management to be identified and explored. It is not known how patients accept  
15 depression screening as part of their routine reviews and whether this is the best  
16 forum for detection of distress to take place. If we find that the disclosure of  
17 depression is hindered by the current consultation process this research may enable  
18 us to identify ways of recognizing distress and depression and engage patients in  
19 further decisions about their management. This and future work may identify areas  
20 of further support needed for the healthcare professionals involved in identification  
21 and management of depressed patients with chronic physical disease. In the longer  
22 term, this work will drive the further development of evidence-based interventions to  
23 improve the cost-effectiveness of the primary care of depression associated with  
24 chronic physical illness.  
25  
26  
27  
28  
29

### 30 **References:**

- 31  
32 1. Goldney RD, Phillips PJ, Fisher LJ, Wilson DH. Diabetes, Depression, and  
33 Quality of Life. *Diabetes Care*2004 May 2004;27(5):1066-70.  
34  
35 2. Davies SJC, Jackson PR, Potokar J, Nutt DJ. Treatment of anxiety and  
36 depressive disorders in patients with cardiovascular disease. *BMJ*2004 April 17,  
37 2004;328(7445):939-43.  
38  
39 3. Lester H, Howe A. Depression in primary care: three key challenges.  
40 *Postgraduate Medical Journal*2008;84(996):545-8.  
41  
42 4. Davidson JR, Meltzer-Brody SE. The underrecognition and undertreatment of  
43 depression: what is the breadth and depth of the problem? *J Clin Psychiatry*.  
44 [Review]. 1999;60 Suppl 7:4-9; discussion 10-1.  
45  
46 5. Barth J, Schumacher M, Herrmann-Lingen C. Depression as a Risk Factor for  
47 Mortality in Patients With Coronary Heart Disease: A Meta-analysis. *Psychosom*  
48 *Med*2004 November 1, 2004;66(6):802-13.  
49  
50 6. Goldman LS, Nielsen NH, Champion HC. Awareness, diagnosis, and  
51 treatment of depression. *J Gen Intern Med*. [Review]. 1999 Sep;14(9):569-80.  
52  
53 7. National Institute of Clinical Excellence. Chronic heart failure: Management of  
54 chronic heart failure in adults in primary and secondary care. London: National  
55 Institute for Clinical Excellence2003.  
56  
57 8. National Institute of Clinical Excellence. Chronic obstructive pulmonary  
58 disease: Management of chronic obstructive pulmonary disease in adults in primary  
59 and secondary care. London: National Institute for Clinical Excellence2004.

60 07/12/2011

V.2

8

- 1  
2  
3 9. National Institute of Clinical Excellence. Parkinsons Disease: NICE guideline.  
4 London2006.
- 5  
6 10. Simon GE, VonKorff M. Recognition, management, and outcomes of  
7 depression in primary care.[see comment]. Arch Fam Med. [Research Support, U.S.  
8 Gov't, P.H.S.]. 1995 Feb;4(2):99-105.
- 9  
10 11. Pignone MP, Gaynes BN, Rushton JL, Burchell CM, Orleans CT, Mulrow CD,  
11 et al. Screening for Depression in Adults: A Summary of the Evidence for the U.S.  
12 Preventive Services Task Force. Annals of Internal Medicine2002 May 21,  
13 2002;136(10):765-76.
- 14  
15 12. National Institute of Clinical Excellence. Depression: Management of  
16 depression in primary and secondary care. London: National Institute for Clinical  
17 Excellence2004.
- 18  
19 13. Lichtman JH, Bigger JT, Blumenthal JA, Frasure-Smith N, Kaufmann PG,  
20 Lesperance Fo, et al. Depression and Coronary Heart Disease. Circulation2008  
21 October 21, 2008;118(17):1768-75.
- 22  
23 14. BMJ Best Practice. Screening: Patient Health Questionnaire-2 (PHQ-2).  
24 2010; Available from: [http://bestpractice.bmj.com/best-](http://bestpractice.bmj.com/best-practice/monograph/55/prevention.html)  
25 [practice/monograph/55/prevention.html](http://bestpractice.bmj.com/best-practice/monograph/55/prevention.html).
- 26  
27 15. NHS Information Centre for health and social care. Quality and outcomes  
28 framework - online GP practice results database. 2010 [cited 2010 20 October  
29 2010]; Available from: <http://www.qof.ic.nhs.uk/>.
- 30  
31 16. Whooley MA, Avins AL, Miranda J, Browner WS. Case-finding instruments for  
32 depression. Two questions are as good as many.[see comment]. J Gen Intern Med.  
33 [Clinical  
34 Comparative Study  
35 Research Support, Non-U.S. Gov't  
36 Research Support, U.S. Gov't, Non-P.H.S.]. 1997 Jul;12(7):439-45.
- 37  
38 17. The NHS Information Centre for Health and Social Care. Quality and  
39 Outcomes Framework 2007/2008. 2008 [10/8/09]; Available from:  
40 [http://www.ic.nhs.uk/webfiles/QOF/2007-](http://www.ic.nhs.uk/webfiles/QOF/2007-08/NewFilesGS/National%20QOF%20tables%202007-08%20-%20clinical.xls)  
41 [08/NewFilesGS/National%20QOF%20tables%202007-08%20-%20clinical.xls](http://www.ic.nhs.uk/webfiles/QOF/2007-08/NewFilesGS/National%20QOF%20tables%202007-08%20-%20clinical.xls).
- 42  
43 18. Gilbody SM, House A, Sheldon T. Screening and case finding instruments for  
44 depression [Systematic Review]. Cochrane Database of Systematic Reviews.  
45 [Systematic Review.]. 2009;3:3.
- 46  
47 19. Gilbody S, Sheldon T, House A. Screening and case-finding instruments for  
48 depression: a meta-analysis. Canadian Medical Association Journal2008 April 8,  
49 2008;178(8):997-1003.
- 50  
51 20. Subramanian DN, Hopayian K. An audit of the first year of screening for  
52 depression in patients with diabetes and ischaemic heart disease under the Quality  
53 and Outcomes Framework. Qual Prim Care2008;16(5):341-4.
- 54  
55 21. Gask L, Bower P, Lovell K, Escott D, Archer J, Gilbody S, et al. What work  
56 has to be done to implement collaborative care for depression? Process evaluation  
57  
58

1  
2  
3 of a trial utilizing the Normalization Process Model. Implementation  
4 Science2010;5(1):15.

5  
6 22. Gunaratman Y. Improving the quality of palliative care: Race Equality  
7 Foundation, 2007.

8  
9 23. Corbin J, Morse JM. The Unstructured Interactive Interview: Issues of  
10 Reciprocity and Risks when Dealing with Sensitive Topics. Qualitative Inquiry2003  
11 June 1, 2003;9(3):335-54.

12  
13 24. Francis, JJ; Johnston, M; Robertson, C; Glidewell, L; Entwistle, V; Eccles, MP;  
14 Grimshaw, JM. What is an adequate sample size? Operationalising data saturation  
15 for theory-based interview studies. Psychol Health December 2010, 25(10): 1229-  
16 1245.

17  
18 25. Department of Health, Talking therapies: A four-year plan of action, 2011  
19 [23/09/2011], Available from: <[http://www.dh.gov.uk/en/  
20 Publicationsandstatistics/Publications/PublicationsPolicyAndGuidance/DH\\_123759](http://www.dh.gov.uk/en/Publicationsandstatistics/Publications/PublicationsPolicyAndGuidance/DH_123759)>.

21  
22 26. General Medical Council, Making and using visual and audio recordings of  
23 patients, 2011 [04/10/2011], Available from: [http://www.gmc-  
24 uk.org/guidance/ethical\\_guidance/making\\_audiovisual.asp](http://www.gmc-uk.org/guidance/ethical_guidance/making_audiovisual.asp)  
25  
26  
27  
28  
29  
30  
31  
32  
33  
34  
35  
36  
37  
38  
39  
40  
41  
42  
43  
44  
45  
46  
47  
48  
49  
50  
51  
52  
53  
54  
55  
56  
57  
58  
59  
60



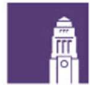

## Evaluation of screening for depression in patients with coronary heart disease and/or diabetes in primary care

**Invitation** We would like to invite you to take part in a research study, tell you why we are doing the research and what it would involve.

**Why are we doing the study?** We know that doctors, nurses and patients have mixed feelings about screening for depression in chronic physical illness (diabetes and coronary heart disease) undertaken for QOF. We want to find out whether this screening has any effect on the detection and treatment of depression. As part of a larger study, we wish to observe the process of depression screening in routine clinical practice. We are not interested in judging the performance of individuals or practices and all of the data we collect will be anonymised.

**Why am I being asked?** Your practice participates in QOF and is encouraged to screen patients with heart disease and/or diabetes for depression.

**Do I have to take part?** No, it is voluntary. If you want to take part we will ask you to sign a consent form to show you have agreed to take part. You can still change your mind at any time without giving a reason.

**What will I have to do if I take part?** Consent from those working at the practice will be obtained. Practices will be asked to assist the recruitment of patients with diabetes and/or coronary heart disease (CHD). This will include pre-arranged chronic disease reviews and opportunistic routine appointments with suitable patients. However, we will work with practices to minimise disruption to routines.

The researcher will observe these consultations after gaining consent from the patients and healthcare professionals. The appointments will be audio recorded and the researcher may also make some notes.

The researcher will then interview patients about their experiences of depression screening. This interview may take place at the practice or at a location of the patient's choosing.

We appreciate that people often behave differently from usual when being observed. With this in mind, the researcher may also observe other consultations or aspects of the healthcare professional's work to get them used to being observed and to gain an understanding of the 'bigger picture' of their work.



1  
2  
3  
4 Patient notes for those patients who have consented will be reviewed by the researcher 4-6 weeks  
5 after the observation to examine any events after screening took place.  
6  
7

8 **Will I be paid?** Practices will be reimbursed by the University of Leeds and CLRN. Practices will  
9 receive £300 reimbursement for taking part in the study as well as a fee for each patient recruited.  
10

11 **What are the possible benefits of taking part?** Individually you do not stand to gain but your  
12 contribution will help us to understand whether QOF-driven screening for depression has had an  
13 impact on patient care; this will inform efforts to improve depression care in the future. We also  
14 hope that you might find participating in this study interesting and we are also willing to provide  
15 evidence of participation to count towards the research domains of annual appraisals.  
16  
17

18 **What are the possible disadvantages of taking part?** We appreciate that healthcare  
19 professionals are very busy. We intend to minimize disruption to patient care responsibilities. Time  
20 needed to participate in this study will be reimbursed as above.  
21  
22

23 **Will my taking part in the study be kept confidential?** Yes. The information we collect will be  
24 anonymous and kept securely so that only authorised people have access to it; they will be bound  
25 by the rules of confidentiality.  
26  
27

28 **What will happen to the results of the study?** It will take about 12 months to complete the study.  
29 When it is finished we will send you a report of the results. We expect the results will also be  
30 presented at medical conferences and published in a medical journal. No confidential information  
31 will be used.  
32  
33

34 **Who is organising the study?** The principal investigator is Dr Sarah Alderson, a GP and Clinical  
35 Lecturer from the University of Leeds. The other people involved are Professor Robbie Foy, Dr  
36 Barbara Potrata, Amy Russell and Professor Allan House from the University of Leeds.  
37  
38

39 **Who is funding this study?** This study has been funded by the National Institute for Health  
40 Research, Research for Patient Benefit Programme.  
41  
42

43 **Who has reviewed the study?** This study has been favorably reviewed by the South West  
44 Research Ethics Proportionate Review Sub-Committee (ref: 11/SW/0335).  
45  
46

47 **What if I have a complaint?** We think this is unlikely to happen, but if it does you can contact us  
48 at the email address or telephone number below, or speak to the complaints department of NHS  
49 Leeds on 0800 052 5270.  
50  
51

52 **If you want to discuss this project in further detail please contact:** Amy Russell on 0113 343  
53 0804 or email [A.M.Russell@Leeds.ac.uk](mailto:A.M.Russell@Leeds.ac.uk).  
54  
55

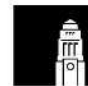

## PARTICIPANT INFORMATION SHEET

1. **Study title:** "Evaluation of screening for depression in patients with coronary heart disease and/or diabetes in primary care"

### 2. **Invitation to take part**

You are being invited to take part in a research study. Before you decide if you would like to be involved, it is important for you to understand why the research is being done and what it will involve. Please take time to read the following information carefully. Discuss it with your friends and family if you wish. Please ask the researchers or your GP if there is anything that is not clear or if you would like more information. Take time to decide whether or not you wish to take part.

### 3. **What is the purpose of the study?**

We want to observe the mood screening process that often takes place during the annual review for people with diabetes and/or coronary heart disease. We'd like to speak to patients to find out how they feel about the mood screening process and what their experiences are of the routine review. We are not trying to change your treatment; we are just trying to find out your views and experiences.

### 4. **Why have I been chosen?**

Because you regularly visit the nurse or doctor about your diabetes.  
Or because you regularly visit the nurse or doctor about your heart or circulation.  
We hope to have about 50 people in the study.

### 5. **Do I have to take part in this study?**

No, it is voluntary. If you decide to take part you are still free to withdraw at any time during your participation, without giving a reason. If you decide not to take part, or decide to withdraw, the treatment and the standard of care you receive, and any of your legal rights will not be affected in any way.

### 6. **What will happen to me if I take part?**

Your participation will involve your appointment with the nurse or GP being recorded and observed by a researcher. You will then be interviewed for up to an hour on the same day as your appointment or up to 3 days later, it is your choice when and where you are interviewed.

If you are interested in taking part please tell the researcher who will be at your GP practice when you arrive for your appointment. If you wish to take part, we will ask you to sign a consent form to show you have agreed to take part.

A researcher will sit in your appointment to observe and also audio-record your appointment. After your review the researcher may briefly speak to your GP or nurse about your review and the decisions they made. The researcher will also ask when and where you would like to be interviewed. This appointment can be at a GP surgery, at your home or at any other suitable place you choose. There will only be one interview which might last up to an hour then your participation in the research is complete. You will be asked some questions about yourself, your mood and the annual review process. The interview will be audio-taped and subsequently written out in full by the researcher. We may use quotes of what you say in the study report; however we will make sure you cannot be identified.

1  
2  
3 You will receive a copy of this information sheet and a copy of your consent form to  
4 keep. You can also receive a summary of the findings of our research if you want.  
5 Amy (the researcher) will ask you if you would like this when you sign your consent  
6 form.  
7

8 **7. Will I be paid?**

9 No, but we will cover your travel expenses if needed for the interview.  
10

11 **8. What are the possible benefits of taking part?**

12 You will not directly benefit by taking part in this study, although some patients find it  
13 beneficial to talk about their experiences and treatment decisions.  
14

15 **9. What are the possible disadvantages and risks of taking part?**

16 *Talking about your experiences may at times be distressing. If you do find the*  
17 *process distressing then our researcher will be able to discuss these issues with you,*  
18 *and, if necessary, will refer you (with your agreement) for additional support.* Your GP  
19 will be aware you are taking part in this research and can provide support to you. If a  
20 researcher believes that you might be a danger to yourself (e.g. you are thinking  
21 about harming yourself) or others we are obliged to alert appropriate services.  
22

23 **10. Complaints**

24 If you wish to complain, or have any concerns about any aspect of the way you have  
25 been approached or treated during the course of the study, please first talk to the  
26 research team on the numbers and emails below and we will try to address your  
27 concerns. If you are still dissatisfied then you can contact Patient Advice and Liaison  
28 Service on Freephone 0800 0525270.

29 We do not anticipate that any harm will come to you from participating in this  
30 research. In the event that something does go wrong and you are harmed during the  
31 research and this is due to someone's negligence then you may have grounds for a  
32 legal action for compensation against University of Leeds or NHS Leeds but you may  
33 have to pay your legal costs. The normal National Health Service complaints  
34 mechanisms will still be available to you through the Patient Advice and Liaison  
35 Service (see above).  
36

37  
38  
39 **11. Will my taking part in the study be kept confidential?**

40 We will be mindful of protecting your confidentiality at all times. The interview  
41 recordings will be immediately destroyed after transcription (writing down what has  
42 been said) and any personal data will be removed and/or anonymised to protect your  
43 identity.

44 Your GP Practice will know you are taking part as the researcher will be in the room  
45 for your review. However, we are aware that some patients may discuss  
46 circumstances, dislikes and/or potential conflict or tensions they have with their  
47 doctors or nurses. Such experiences and events could be discussed in academic  
48 papers, but in all cases, including these, we will use pseudonyms and anonymised  
49 accounts to protect your identity.  
50

51 **12. What will happen to the results of the research study?**

52 We plan to present the results at academic conferences and publish the results in  
53 academic journals; this will aid health professionals to learn more about how to  
54 identify patients with low mood. Summary results may also be given to patient  
55 organisations.

56 If you would like to obtain a copy of the results, please let the researchers know and  
57 they will send you a copy when the study is completed.  
58  
59  
60

1  
2  
3  
4  
5 **13. Who is organising and funding the research?**

6 The person you will speak with is Amy Russell, a researcher from the University of  
7 Leeds. Sarah Alderson is in charge of this project and also based at the University of  
8 Leeds. The study is funded by the National Institute for Health Research as part of  
9 the Research for Patient's Benefit programme.  
10

11 **14. Who has reviewed the study?**

12 All research in the NHS is looked at by independent group of people, called a  
13 Research Ethics Committee, to protect your interests. This study has been reviewed  
14 and given favourable opinion by the South West Research Ethics Committee (ref:  
15 11/SW/0335).  
16

17 **15. Contact for Further Information**

18 You may obtain more information about this study by contacting the study's  
19 researcher Amy M. Russell on 0113 343 0804 or email [a.m.russell@leeds.ac.uk](mailto:a.m.russell@leeds.ac.uk) or  
20 the study's Chief Investigator Sarah Alderson ([s.l.alderson@leeds.ac.uk](mailto:s.l.alderson@leeds.ac.uk)) 0113  
21 3430867 <http://www.leeds.ac.uk/hsp/hr/research/AUPC/rfpb-depression.html>  
22 You can also contact the National Institute of Health Research's Patient and Public  
23 Involvement Manager: Marianne Miles, [marianne.miles@nihr.ac.uk](mailto:marianne.miles@nihr.ac.uk) or 0113 34  
24 30440 or People in Research <http://www.peopleinresearch.org/> both of whom provide  
25 independent advice on taking part in research.  
26

27 **Thank you for reading this.**  
28  
29  
30  
31  
32  
33  
34  
35  
36  
37  
38  
39  
40  
41  
42  
43  
44  
45  
46  
47  
48  
49  
50  
51  
52  
53  
54  
55  
56  
57  
58  
59  
60

# BMJ Open

## Incentivised case finding for depression in patients with chronic heart disease and diabetes in primary care: an ethnographic study

|                                 |                                                                                                                                                                                                                                                                                                                                                                                                                               |
|---------------------------------|-------------------------------------------------------------------------------------------------------------------------------------------------------------------------------------------------------------------------------------------------------------------------------------------------------------------------------------------------------------------------------------------------------------------------------|
| Journal:                        | <i>BMJ Open</i>                                                                                                                                                                                                                                                                                                                                                                                                               |
| Manuscript ID:                  | bmjopen-2014-005146.R1                                                                                                                                                                                                                                                                                                                                                                                                        |
| Article Type:                   | Research                                                                                                                                                                                                                                                                                                                                                                                                                      |
| Date Submitted by the Author:   | 16-Jun-2014                                                                                                                                                                                                                                                                                                                                                                                                                   |
| Complete List of Authors:       | Alderson, Sarah; University of Leeds, Leeds Institute of Health Sciences<br>Russell, Amy; University of Leeds, Leeds Institute of Health Sciences<br>McLintock, Kate; University of Leeds, Leeds Institute of Health Sciences<br>Potrata, Barbara; University of Leeds, Leeds Institute of Health Sciences<br>House, AO; Academic Unit of Psychiatry,<br>Foy, Robbie; University of Leeds, Leeds Institute of Health Sciences |
| <b>Primary Subject Heading</b>: | General practice / Family practice                                                                                                                                                                                                                                                                                                                                                                                            |
| Secondary Subject Heading:      | Patient-centred medicine, Mental health, Health policy, Cardiovascular medicine, Diabetes and endocrinology                                                                                                                                                                                                                                                                                                                   |
| Keywords:                       | PRIMARY CARE, Coronary heart disease < CARDIOLOGY, General diabetes < DIABETES & ENDOCRINOLOGY, MENTAL HEALTH, Depression & mood disorders < PSYCHIATRY, QUALITATIVE RESEARCH                                                                                                                                                                                                                                                 |
|                                 |                                                                                                                                                                                                                                                                                                                                                                                                                               |

SCHOLARONE™  
Manuscripts

Only

1  
2  
3 **Incentivised case finding for depression in patients with chronic heart disease and**  
4 **diabetes in primary care: an ethnographic study**  
5

6 Sarah L Alderson, Amy M Russell, Kate McLintock, Barbara Potrata, Allan House, Robbie  
7 Foy

8 Leeds Institute of Health Sciences, Charles Thackrah Building, University of Leeds, 101  
9 Clarendon Road, Leeds, LS2 9LJ. Sarah L Alderson  
10 Clinical Lecturer in Primary Care  
11

12  
13 Leeds Institute of Health Sciences, Charles Thackrah Building, University of Leeds, 101  
14 Clarendon Road, Leeds, LS2 9LJ. Amy M Russell  
15 Senior Research Fellow  
16

17  
18 Leeds Institute of Health Sciences, Charles Thackrah Building, University of Leeds, 101  
19 Clarendon Road, Leeds, LS2 9LJ. Kate McLintock  
20 Clinical Lecturer in Primary Care  
21

22  
23 Leeds Institute of Health Sciences, Charles Thackrah Building, University of Leeds, 101  
24 Clarendon Road, Leeds, LS2 9LJ. Barbara Potrata  
25 Research Fellow  
26

27  
28 Leeds Institute of Health Sciences, Charles Thackrah Building, University of Leeds, 101  
29 Clarendon Road, Leeds, LS2 9LJ. Allan House  
30 Professor of Liaison Psychiatry  
31

32  
33 Leeds Institute of Health Sciences, Charles Thackrah Building, University of Leeds, 101  
34 Clarendon Road, Leeds, LS2 9LJ. Robbie Foy  
35 Professor of Primary Care  
36

37  
38 The Corresponding Author has the right to grant on behalf of all authors and does grant on  
39 behalf of all authors, a worldwide licence to the Publishers and its licensees in perpetuity, in  
40 all forms, formats and media (whether known now or created in the future), to i) publish,  
41 reproduce, distribute, display and store the Contribution, ii) translate the Contribution into  
42 other languages, create adaptations, reprints, include within collections and create  
43 summaries, extracts and/or, abstracts of the Contribution, iii) create any other derivative  
44 work(s) based on the Contribution, iv) to exploit all subsidiary rights in the Contribution, v)  
45 the inclusion of electronic links from the Contribution to third party material where-ever it may  
46 be located; and, vi) licence any third party to do any or all of the above.  
47  
48  
49  
50  
51  
52  
53  
54  
55  
56  
57  
58  
59  
60

## Abstract

### *Objective*

To examine the process of case-finding for depression in people with diabetes and coronary heart disease within the context of a pay-for-performance scheme.

### *Design*

Ethnographic study drawing upon observations of practice routines and consultations, debriefing interviews with staff and patients, and review of patient records.

### *Setting*

General practices in Leeds, United Kingdom.

### *Participants*

Twelve purposively sampled practices with a total of 119 staff; 63 consultation observations; and 57 patient interviews.

### *Main outcome measure*

Audio-recorded consultations and interviews with patients and health care professionals along with observation field notes were thematically analysed. We assessed outcomes of case-finding from patient records.

### *Results*

Case-finding exacerbated the discordance between patient and professional agendas, the latter already dominated by the tightly structured and time-limited nature of chronic illness reviews. Professional beliefs and abilities affected how case-finding was undertaken; there was uncertainty about how to ask the questions, particularly amongst nursing staff.

Professionals were often wary of opening an emotional “can of worms.” Subsequently, patient responses potentially suggesting emotional problems could be prematurely shut down by professionals. Patients did not understand why they were asked questions about depression. This sometimes led to defensive or even defiant answers to case-finding.



1  
2  
3 Follow up of patients highlighted inconsistent systems and lines of communication for  
4  
5 dealing with screened positive cases.  
6

### 7 *Conclusions*

8  
9  
10 Case-finding does not fit naturally within consultations; both professional and patient  
11  
12 reactions somewhat subverted the process recommended by national guidance. Quality  
13  
14 improvement strategies will need to take account of our results in two ways. First, despite  
15  
16 their apparent simplicity, the case-finding questions are not consultation-friendly, and  
17  
18 acceptable alternative ways to raise the issue of depression need to be supported. Second,  
19  
20 case-finding needs to operate structured pathways which can be accommodated within  
21  
22 available systems and resources.  
23

### 24 **Strengths and limitations of this study**

#### 25 **Strengths**

- 26
- 27
- 28
- 29
- 30 • Multi-site ethnography of broadly representative general practices
- 31
- 32 • Triangulation through use of multiple sources of data
- 33
- 34

#### 35 **Limitations**

- 36
- 37 • Potential for clinician and patient behaviour to alter as a response to being observed
- 38
- 39
- 40 • Short periods of observation in each practice limiting range of types of behaviour
- 41  
42 observed
- 43
- 44 • Observations within one geographical area, thereby potentially limiting
- 45  
46 generalisability
- 47
- 48
- 49
- 50
- 51
- 52
- 53
- 54
- 55
- 56
- 57
- 58
- 59
- 60

## Introduction

The detection and management of depression associated with chronic physical illness represents a major challenge for primary care. Depression is twice as common in those with chronic physical illness such as coronary heart disease (CHD) and diabetes compared to those without chronic physical illness [1-4]. Such co-morbidity can make depression hard to recognize, especially as symptoms of depression (such as fatigue) overlap with those of chronic physical illnesses [5]. Co-morbidity is also associated with poorer outcomes, including mortality [3 6 7]. One response is case-finding, defined as selective screening for depression in populations at high risk, such as those with chronic illness. This has been recommended by national guidance in the UK [8] and elsewhere. [9 10]. The Quality Outcomes Framework (QOF), a pay-for-performance scheme in UK primary care, rewarded depression case-finding using two standard screening questions from the Patient Health Questionnaire-2 (PHQ-2) in all patients with CHD or diabetes [11]. The PHQ-2 asks, 'In the past two weeks, have you been bothered by: little interest or pleasure in doing things; and feeling down, depressed or hopeless?' [12] Routine data suggested high levels of screening, with a national average of 86% of eligible patients screened in 2011-12 [13].

However, there are problems with both the rationale underpinning this recommendation and the means undertaken to promote its implementation in the UK.

Firstly, there is no evidence that case-finding for depression by itself improves patient outcomes [14]. For case-finding to be effective it is important that potential cases are further assessed, diagnosed and offered appropriate clinical management within a structured clinical pathway [15-17]. There was no closely allied incentive in the QOF programme for subsequent patient care. Case-finding should also be considered against other recommended criteria for screening tests, such as acceptability and having an agreed policy about whom to treat as patients [18 19].

Secondly, evidence on the effects of financial incentives on primary care practice is, at best, mixed [20-22]. There are concerns that such incentives undermine professionals' intrinsic

1  
2  
3 motivation, patient-centeredness, and continuity of care and have led to a 'tick box' culture  
4 as health professionals work through checklists for chronic illness management [21 23-25].  
5  
6 Health professionals themselves have expressed dissatisfaction with incentivised depression  
7  
8 management, particularly the use of incentivised depression severity measurements. [26-28].  
9

10  
11 Our accompanying interrupted time series analysis found that incentivised case finding  
12  
13 increased new depression-related diagnoses in people with diabetes and CHD and  
14  
15 perpetuated rising trends in new prescriptions of antidepressants [29]. Even though this  
16  
17 incentivised case finding ceased in 2012, there are continuing calls for 'something to be  
18  
19 done' to detect and treat depression in high risk groups [30-32]. However, the professional  
20  
21 and patient experiences of incentivised case-finding, how it affected clinical care, and its fit  
22  
23 with the routines of practice life are poorly understood. We investigated the process of  
24  
25 incentivised case-finding during scheduled and opportunistic reviews of patients with  
26  
27 diabetes and CHD.  
28  
29

## 30 31 **Methods**

### 32 33 *Design and setting*

34  
35 Our ethnographic design combined direct observation with interviews and review of patient  
36  
37 records. We wanted to build an in-depth understanding of how patient case-finding was  
38  
39 conducted within the context of everyday practice life and routine patient care. The study  
40  
41 took place in general practices in Leeds, UK.  
42  
43  
44

### 45 46 *Participants*

47  
48 We invited all practices in Leeds to participate. We then sought a purposive sample of  
49  
50 practices using a four-by-two sampling frame based upon whether practice QOF  
51  
52 achievement was above or below the Leeds median, further stratified by list size and  
53  
54 deprivation profiles. Practices that consented to participate were booked for a week of  
55  
56 observation, during which we aimed to observe at least three consultations.  
57  
58  
59  
60

1  
2  
3 Practices sent letters of invitation and information packs to patients scheduled for chronic  
4 disease reviews within the observation week. We also approached patients attending for  
5 routine consultations to enable observation of opportunistic case-finding. Practice staff  
6 identified patients due to be asked the case-finding questions and asked if they would be  
7 interested in participating when they arrived at reception for their appointment. All patients  
8 and professionals subsequently observed gave informed consent.

### 15 *Data collection and analysis*

16  
17 An ethnographer (AR) used a funnelling approach to observe and describe the context of  
18 and behaviours within the practice [33], moving to detailed observation and audio-recording  
19 of consultations. Observation considered both verbal and non-verbal features including: how  
20 case-finding questions are framed and asked; events leading up to questioning; patient  
21 verbal and non-verbal reactions and responses; and overall style of the consultation. This  
22 style of observation allowed the researcher to layer the analysis of the consultations with  
23 contextual information providing a richer interpretation of the observation data. She held  
24 semi-structured debriefing interviews with patients who had been observed. The interviews  
25 aimed to explore patient views on the process and experience of the consultation in further  
26 depth. Unstructured interviews took place with the health care professionals involved in  
27 depression case-finding and notes taken on all discussions regarding depression case-  
28 finding. We reviewed patients' medical records six weeks after observation to check for any  
29 subsequent clinical events related to depression identification and management. Events  
30 included appointments where mood was discussed, telephone consultations, depression  
31 severity assessments, referrals to mental health teams or talking therapies and new  
32 prescriptions for depression medication.

33  
34  
35  
36  
37  
38  
39  
40  
41  
42  
43  
44  
45  
46  
47  
48  
49  
50  
51  
52 The perceived relative importance and organisation of QOF-related case-finding may vary  
53 throughout the year. To partly ameliorate this we observed two practices towards the end of  
54 the financial year when practices are typically working hardest to achieve QOF targets.  
55  
56  
57  
58  
59  
60

1  
2  
3 Transcribed data (interviews, observation transcripts and observation notes) were managed  
4 using NVivo9 and coded for themes. Thematic analysis was undertaken by two researchers,  
5 independently coding for the themes and then comparing codes and themes. The analysis  
6 was further refined by using constant comparison of themes, and looking for negative cases  
7 in order to examine for similarities and differences within and between the patients'  
8 perception and observations in different centres. Finally, to improve reliability and validity of  
9 data, we triangulated findings from all three data sources.  
10  
11  
12  
13  
14  
15  
16

### 17 *Ethical review*

18  
19  
20 The study was approved by National Research Ethics Service Committee South West –  
21 Exeter (11/SW/0335).  
22  
23  
24  
25  
26

### 27 **Results**

28  
29 Twelve practices participated and a total of 63 patient consultations were observed (range 2-  
30 13 per practice; Table 1). Practice characteristics were relatively balanced, with five having  
31 QOF achievement above the median for Leeds, five above median population deprivation  
32 scores, and six above median list size. Patients were most commonly male, age 51-79  
33 years, and white British (Table 2). Most (73%) participants had diabetes and nine (14%) had  
34 a previous diagnosis of depression. Nine of the observed case findings took place  
35 'opportunistically' within routine GP appointments. The rest occurred within dedicated  
36 chronic disease clinics, usually with nurses.  
37  
38  
39  
40  
41  
42  
43  
44

45  
46 Based upon available guidance, observations and interviews, we constructed a basic  
47 normative model of the process by which case-finding was expected to improve depression  
48 detection and treatment (Figure 1). We then identified a number of ways in which  
49 professional and patient behaviours and beliefs and the working patterns of general  
50 practices subverted or affected the operation of this model. We found five barriers:  
51  
52  
53  
54  
55  
56  
57  
58  
59  
60

1  
2  
3 how to undertake the case-finding itself; reluctance to open a “can of worms”; patients being  
4  
5 unaware of depression risk or case-finding taking place; and competing practice priorities  
6  
7 and inconsistent lines of communication around the management of potential cases of  
8  
9 depression.

### 10 11 *Discordance between patient and professional agendas*

12  
13 Case-finding often occurred within tightly structured and time-limited chronic illness reviews  
14  
15 required to document QOF processes of care, and appeared to exacerbate existing  
16  
17 discordance. This led to professionals disregarding attempts by patients to steer the  
18  
19 consultation around to their own perceived needs. Patients were often not focused on and  
20  
21 often did not understand the purpose of the review process and used the consultation as an  
22  
23 opportunity to raise other problems. To manage this, professionals often interrupted patients  
24  
25 or returned the consultation to its purpose, discounting clues that the patient had worries  
26  
27 related to the chronic disease being reviewed or other illnesses.  
28  
29

30  
31 Patient: [talking about hypoglycaemic attacks which were a subject of significant  
32  
33 anxiety for this patient (revealed in interview after appointment)] *Only time that I went*  
34  
35 *funny, I had a tooth out and I'd had, I couldn't have any breakfast, or I didn't have any*  
36  
37 *breakfast, because I don't like to be poorly when I've had teeth out, because I used*  
38  
39 *to be when I was younger, am I talking and disturbing....*

40  
41 [Fieldnote] Nurse is trying to measure blood pressure; patient looks agitated.

42  
43 Nurse: *Yes, I think you just probably need to just be quiet for a couple of minutes*  
44  
45 *while I check it, because it's even higher now! We want it to go down! Just try and*  
46  
47 *relax. OK. Observation 29*  
48  
49

50  
51 At this stage in the consultation the patient became distressed, apparently wishing to discuss  
52  
53 further their worries about hypoglycaemia. The professional subsequently moved the  
54  
55 conversation on to another QOF target and no follow up of concerns about hypoglycaemia  
56  
57 was arranged. The patient later told the researcher she was extremely worried about hypos  
58  
59  
60

1  
2  
3 and was experiencing consistently low mood and high anxiety. The context of chronic illness  
4 reviews was restrictive – in this case an opportunity for direct, subject specific case-finding  
5 was missed because of the necessity to ask about and record other items. This represents  
6 a missed opportunity for case-finding at a point in the review when the patient might have  
7 been receptive to exploring associated mood problems.  
8  
9

10  
11  
12  
13 Difficulties arose in the consultation when the patient mentioned something that was  
14 perceived to be important but unrelated to the review. Sometimes the review had to be  
15 abandoned as the patient's agenda became too important to be ignored, or the patient too  
16 distressed to continue concentrating on the review. This more patient-centred approach  
17 appeared to occur more often in practices that had lower than average QOF achievement,  
18 suggesting that such practices traded off potential income against responsiveness to  
19 patients.  
20  
21  
22  
23  
24  
25  
26

### 27 28 *Professional uncertainty around how to undertake the case-finding itself*

29  
30  
31 Professional beliefs and abilities affected how case-finding was undertaken. In conversation  
32 professionals expressed uncertainty about how best to phrase and ask the questions,  
33 particularly nursing staff who told the researcher they sometimes felt insufficiently trained on  
34 how to manage patients with possible depression. When asked, they questioned whether  
35 they were case-finding for QOF rather than patient benefit. We noticed that those who felt  
36 that the case-finding was for the benefit of patients appeared to work in practices that were  
37 in areas of low deprivation, where as those in areas of higher deprivation felt there was a  
38 lack of time to ask the questions and deal with any responses that might indicate a problem  
39 with mood. In the context of a time-restricted consultation they felt overburdened.  
40  
41  
42  
43  
44  
45  
46  
47  
48

49  
50 Field notes Practice A: [The nurse] referred to QOF as coming from “*on high*” to tell her  
51 to incorporate it [case-finding]. She felt depression screening was problematic as they  
52 had received “*no training*” in mental health or in screening and they were very  
53 “*stretched for time in the appointment.*”  
54  
55  
56  
57  
58  
59  
60

1  
2  
3 Professionals avoided directly asking case-finding questions if they were familiar with  
4 patients but still recorded case-finding; they expressed beliefs that they could identify mood  
5 changes through existing knowledge of patients. They often adapted the questions to suit  
6 their consultation style or perceived patient needs.  
7  
8  
9

10  
11 Sometimes confusion arose when the questions were framed to ask whether the patient was  
12 coping with their illness, rather than to assess mood disorders in general. The patient  
13 answered that they were managing their condition well but did not talk about their mood.  
14 This was because the professionals believed the case-finding was to detect depression  
15 associated with chronic disease only, not depression of any cause.  
16  
17  
18  
19  
20

21  
22 *Nurse: Then so do you feel ok about your diabetes, do you have any, do you worry*  
23 *about it, does it bother you at all? Observation 27*  
24  
25  
26

27 The case-finding questions were usually asked in the middle of chronic disease reviews.  
28 Generally the templates for such reviews were followed in order, with depression case-  
29 finding often occurring after discussion of alcohol consumption and smoking status. Once  
30 asked, the professional would move on to discuss diet and exercise. The case-finding  
31 questions appeared out of place in the consultation that mainly involved measuring physical  
32 factors rather than mood related problems. When asked about the case-finding, most  
33 nurses felt it was difficult to switch from asking something that could be measured (such as  
34 weight, units of alcohol consumed) to something more subjective.  
35  
36  
37  
38  
39  
40  
41  
42  
43

#### 44 *Reluctance to open a "can of worms"*

45

46 Professionals at nearly every practice mentioned the term "can of worms" to express unease  
47 with case-finding for depression. This metaphor indicated professional perceptions of both  
48 patient discomfort with being asked about emotions and their own emotional labour in asking  
49 the questions. "Can of worms" helped articulate the belief that case-finding for depression  
50 was anticipated as a problematic part of the consultation and threatened to derail routines.  
51 Professionals anticipated having to manage and close down answers before patients began  
52  
53  
54  
55  
56  
57  
58  
59  
60



1  
2  
3 to give them; this often informed their immediate response to patients' answers regardless of  
4  
5 what patients said.  
6

7  
8 Many felt that by identifying a problem, it was their duty to uncover further the scale of the  
9  
10 problem and to discuss this further with the patient, rather than requesting that the patient  
11  
12 should make an appointment to discuss this with the doctor or when there would be more  
13  
14 time to devote to this. It was hard to move the consultation onto the rest of the review. This  
15  
16 often led to the questions being asked in a manner that made it difficult for the patient to  
17  
18 answer 'yes', such as "you have no problems coping, do you?" pre-empting any difficulties  
19  
20 the questions may cause.  
21

22  
23 "Then Nurse 1 said *"it's a question that makes you sigh, makes your heart heavy,*  
24  
25 *because you're there and you say "you've been down and depressed?"* and she said  
26  
27 "loads of them saying "yes" and she's thinking 'no, you're not, you're not, depressed,  
28  
29 depressed, you're just a bit down, a bit fed up, aren't we all!' So then she has to say  
30  
31 "Oh, why do you think that?" and it starts this 10 minute conversation that she really  
32  
33 didn't want to be having, because she's had to do three blood pressure readings,  
34  
35 loads of blood tests, trouble getting a vein, had to check their feet, loads of faffing  
36  
37 around, she's only got 20 minutes." Field notes Practice F  
38

39  
40 Patients seldom answered with a simple "yes" or "no" and brought up specific difficulties,  
41  
42 such as bereavement. Following an initial acknowledgement, professionals then tended to  
43  
44 move consultations on without discussing the effects of these life events on mood.  
45  
46 Therefore, professionals prematurely shut down patient responses suggesting emotional  
47  
48 problems to reduce the risk of extended consultations.

49  
50 Nurse: *Are you alright, you haven't been having little interest in doing things, or?*

51  
52 Patient: *No, no.*

53  
54 Nurse: *Are you fine, are you okay? That's okay.*

55  
56 Patient: *It's been 10 years since I've lost [woman's name].*

57  
58 Nurse: *Is it, what, is that your wife?*  
59  
60

1  
2  
3 Patient: Yes.

4 Nurse: 10 years? That's a long time, isn't it? Can I just check your tablets then, do  
5  
6 you take aspirin, [lists medication]... Observation 23  
7  
8

9  
10 Some health care professionals talked about the emotional labour involved in case-finding.  
11  
12 Discussing depression was seen as being emotionally difficult and required feeling strong in  
13  
14 themselves, in order to cope with the answer. The emotional burden was exacerbated by  
15  
16 the professional's perception that regardless of the outcome of case-finding, there wouldn't  
17  
18 be in any change for the better for the patient. They perceived they were expending a great  
19  
20 deal of emotional labour on something that did not improve patient care and this  
21  
22 compounded their feelings.  
23

24  
25 “[The nurse] said she screened a woman with COPD who then cried and cried and  
26  
27 then refused help and said she would sort herself out. This woman refused support  
28  
29 and refused to quit smoking. Then she screened a man who was overweight and  
30  
31 she'd just told him how serious his weight was and he cried about his weight and  
32  
33 then she offered support with mood and weight loss and he said no. So she said  
34  
35 most often it opens a can of worms, is demanding and difficult and rarely does  
36  
37 anything come of it.” Field notes practice B  
38

### 39 *Patients being unaware of depression risk or case-finding taking place*

40  
41  
42 Many patients screened did not see themselves as the type of people who would be prone to  
43  
44 depression and did not understand why they were asked. They appreciated the idea that  
45  
46 people should experience case-finding for depression but distanced themselves from the  
47  
48 identity of those people. This sometimes led to defensive or even defiant answers, or  
49  
50 deflecting questions with humour in an apparent attempt to illustrate how preposterous it was  
51  
52 to suspect that they might be suffering from depression. This contradictory position of  
53  
54 wanting everyone else to experience case-finding, seeing the purpose/necessity of asking  
55  
56 the questions but, in contrast, not feeling they should be screened and thus derided the  
57  
58  
59  
60

1  
2  
3 process or made light of it. This illustrates that the case-finding process in itself does not  
4  
5 impact on patient self-perception of who may suffer from depression and thus does not  
6  
7 enable them to answer the questions honestly and openly. They were concerned that they  
8  
9 were being seen as someone who could not cope. This especially occurred when the  
10  
11 patient felt they had needed to be defensive over their lifestyle choices, such as diet,  
12  
13 exercise, alcohol consumption, just before being screened. The review was seen as a  
14  
15 'telling off' for not doing the right things which then made it difficult to answer subjective  
16  
17 questions about mood.

18  
19 Nurse: *So during the past month have you been bothered by feeling down or*  
20  
21 *depressed or hopeless at all?*

22  
23 Patient looks perplexed.

24  
25 Patient: *I'm always...* (His voice cracks and pretends to cry and rub his eyes like a  
26  
27 child) *Am I heck!*

28  
29 Fieldnote: Nurse shuffles in her seat and leans forward. She's smiling but not 100%  
30  
31 comfortable. Observation 24

32  
33  
34 Interviewed patients articulated the belief that the professionals would pick up mood  
35  
36 problems or not coping without the need for such questions. They felt being aware of  
37  
38 depression was important in a generalised context but it did not fit with who they were, and  
39  
40 so found it hard to understand in the context of a chronic disease review.

41  
42  
43 Patient: *I mean if you're, if you're down they don't have to ask, they know so they*  
44  
45 *start talking about it.* Interview 2

46  
47  
48 Several patients admitted difficulty with answering questions about mood within the chronic  
49  
50 disease review during the interviews. They did not feel it was the appropriate place to  
51  
52 discuss mood and that the chronic disease review took over the consultation. Some  
53  
54 mentioned that they would like to be asked at a separate appointment just to cover mood,  
55  
56 although also understood the difficulties in achieving this.

1  
2  
3 *“Just the fact that it’s like a, a review appointment and that I’m under time pressure*  
4 *so it’s not, I feel like if I am to be asked about like depression and something like that,*  
5 *there has to be a separate one (I: right) or like something depression, or like mood,*  
6 *sort of like mental illness or like anxiety or whatever, like related, an appointment*  
7 *related specifically to that or like a clinic specifically related to that.” Interview 21*  
8  
9  
10  
11  
12

13 Patients were mostly unaware of the increased prevalence of depression in chronic illness,  
14 although felt they understood why it might occur. They suggested that introducing the case-  
15 finding questions following an explanation that depression was more common in chronic  
16 illness might facilitate disclosure; this rarely happened in practice.  
17  
18  
19  
20  
21

22 *Researcher: So when the nurse asks you about your mood... just like I’m trying to*  
23 *imagine your perspective, why do you think that she’s asking these questions*  
24 *usually when you get asked?*  
25  
26  
27  
28

29 *Patient: I don’t know really, I didn’t know whether it was because of my history [of*  
30 *depression] or... I didn’t realise that people with heart problems and diabetes get*  
31 *depressed. I suppose if you’re not well or you’ve got on going things with you, I*  
32 *suppose it can depress you.” Interview 44*  
33  
34  
35  
36  
37

38 *Competing practice priorities and inconsistent lines of communication around the*  
39 *management of potential cases of depression*  
40  
41  
42

43 Practices varied in how they prioritised and organised case-finding for depression. Some  
44 practices devoted a lot of time and energy whilst others considered that some elements of  
45 QOF, such as the depression indicators, required too much effort for too little gain.  
46  
47  
48  
49

50 *Field notes, Practice B: This leads to a debate over the decision between QOF*  
51 *payments and the work put in to achieve those payments. GPs are saying they*  
52 *should “choose their battles.”*  
53  
54  
55  
56  
57  
58  
59  
60

1  
2  
3 One practice did not concentrate on QOF at all and offered a different style of practice to  
4 their patients, with patients being seen as and when they wanted and most staff being  
5 unaware of the QOF domains and items needed, or where to find them on the computer  
6 system. Despite this, the nursing staff still used the QOF template to conduct the chronic  
7 disease reviews.  
8  
9  
10  
11

12  
13  
14 “I ask how many patients haven’t been screened for depression in the last 15months.

15  
16 No one knows how to find this out (including the Practice Manager and the IT guy).”

17  
18 Field notes Practice J

19  
20 Five out of 63 patients screened positive; practices subsequently acted on one of these.  
21  
22 Two patients who screened negative subsequently consulted to seek help for mood  
23 problems. Our follow up highlighted inconsistent systems and lines of communication within  
24 practices for dealing with screen-positive patients. Although GPs were aware that nursing  
25 staff undertook case finding, many did not know how a positive screen would be  
26 communicated to them. Nurses assumed that GPs reviewed the case-finding outcome when  
27 seeing patients following reviews but this was seldom the case. For example, one patient  
28 who screened positive was asked to return a PHQ9 which indicated moderate depression  
29 symptoms. This was filed without notification to a GP and only picked up on our clinical  
30 record review.  
31  
32  
33  
34  
35  
36  
37  
38  
39

40  
41 Practices in areas with less deprivation seemed more likely to have a specified system for  
42 following up positive case-finding results.  
43  
44

45  
46 “[The nurse] said if they answered they were depressed she’d do the PHQ9 with  
47 them and make them an appointment to see the Dr but she felt the Dr wouldn’t do  
48 anything for them and doing the PHQ9 makes her run late so she’s conflicted  
49 about how useful it is to screen if you feel no one cares about the result.” Field  
50 notes Practice A  
51  
52  
53  
54  
55  
56  
57  
58  
59  
60

1  
2  
3            “[The doctor] said she didn’t really look at the mental health stuff. I said *“Is there like a*  
4            *system in place or does a score of two trigger anything, or?”* and she said *“no, maybe*  
5            *we need to look at that.”* But she left it there.” Field notes Practice F  
6  
7  
8  
9

## 10 11 **Discussion**

12  
13 Case-finding for depression did not naturally fit within primary care consultations. It  
14 appeared to augment discordance between professionals and patients. Professionals  
15 struggled to align case-finding with a person-centred approach and were wary of the risk of  
16 patients’ emotional issues derailing routine reviews. Professionals believed it was good to  
17 ask about mental health but disliked the structure of the PHQ-2 and feeling forced to add it to  
18 consultations. They subsequently responded by going ‘off script’ or discounting cues.  
19  
20  
21  
22  
23

24 Patients sometimes did not understand why the case-finding questions were being asked, or  
25 did not see themselves as the type of people prone to depression. This led to defensiveness  
26 or even defiance in their responses, especially if not anticipated as part of their review.  
27  
28  
29

30 Practice responses to case finding outcomes were haphazard, which may have reflected  
31 professional ambivalence towards depression case-finding and the available treatment  
32 options for those identified as having depression.  
33  
34  
35  
36  
37

38 Case-finding for depression exemplifies what happens when attempts are made to fit  
39 apparently straightforward but deceptively complex interventions into primary care  
40 consultations and systems. Previously, only anecdotal evidence suggested that  
41 implementing case-finding was more difficult than intended [34]. This study provides clear  
42 evidence to the barriers faced by professionals and patients in implementing depression  
43 case-finding in practice, as well as observational data of what actually happens in practice  
44 that both parties may not be aware of. Implementing depression case-finding is different to  
45 other QOF targets as the topic itself is subject to significant stigma from both parties.  
46  
47  
48  
49  
50  
51  
52  
53  
54

55 This study provides the strongest evidence yet that the principle of interrupting the flow of  
56 clinical conversation to ask out-of-context questions about sensitive issues has many  
57  
58  
59  
60

1  
2  
3 significant barriers in clinical consultations. Much has been written about how QOF checklist  
4 approaches have disrupted consultation flows and led to the patient agenda being unheard  
5 [35-38]. This is part of a wider phenomenon. For example, Rousseau *et al* demonstrated  
6 how a set of computerised prompts conflicted with established consultation processes [39].  
7 Adding the case-finding questions to these processes is inappropriate when the scripts and  
8 protocols have already created discordance between agendas. Such experience highlights  
9 the need for systematic development and evaluation of such interventions to ensure  
10 acceptability and feasibility before wider roll-out [40]. Despite their apparent simplicity, our  
11 study has shown that depression case-finding questions were not implemented consistently  
12 within consultations and practice routines.

13  
14 Our findings also help explain the lack of benefit of case-finding when it is implemented  
15 outside of collaborative care models [14]. We identified mixed attitudes towards case-finding  
16 amongst both professionals and patients, coupled with the absence of agreed pathways for  
17 patient follow-up and management. Collaborative care, with explicit monitoring and  
18 structured management of both physical and mental health problems could help alleviate  
19 some of the barriers identified in this study.

20  
21 Study limitations mainly related to the nature of our observations, and sampled practices.  
22 We were aware of the intrusive nature of observation and the likelihood that people behaved  
23 differently when under observation. For example, professionals may have made more of an  
24 effort to ask the PHQ2 questions sensitively, or ask them at all. When possible, observation  
25 began following a period of familiarisation to allow the healthcare professional to grow used  
26 to the researcher's presence. A week may also be insufficient to fully understand all practice  
27 processes and relationships; however, similar approaches have produced substantial  
28 insights into healthcare organisational behaviour elsewhere [41]. Even allowing for these  
29 limitations, it is striking how often professionals did deviate from recommended practice.  
30 Professionals and patients are often used to the presence of a third party during  
31  
32  
33  
34  
35  
36  
37  
38  
39  
40  
41  
42  
43  
44  
45  
46  
47  
48  
49  
50  
51  
52  
53  
54  
55  
56  
57  
58  
59  
60

1  
2  
3 consultations for training purposes, although some of the nurses observed did comment on  
4 feeling under pressure to demonstrate that they were following procedures correctly.  
5  
6

7  
8 The generalizability of our findings may be limited given that this study took place within one  
9 geographical area. However, Leeds is typical of UK cities in terms of social deprivation  
10 indices, demographics, characteristics of primary care services and distribution of common  
11 diseases such as CHD and diabetes [42]. Furthermore, we sampled a relatively diverse  
12 range of practices and found that practice characteristics, such as deprivation and QOF  
13 achievement, affected how case-finding was approached. Opportunistic case findings were  
14 under-represented in our sample of 63 consultations but we did not find any systematic  
15 differences from chronic disease review case findings in our analysis.  
16  
17

18  
19 We identified a range of problems with incentivised screening for depression. Our  
20 accompanying interrupted time series analysis indicates that incentivised case-finding did  
21 change clinical behaviour, increasing new depression-related diagnoses and, compared with  
22 untargeted patients with chronic illness, perpetuated increasing rates of antidepressant  
23 prescribing [29]. It is difficult to predict with any confidence whether greater changes would  
24 have occurred if case-finding had been applied with greater fidelity. However, our findings  
25 have broader implications for efforts to improve detection of depression in people with  
26 chronic illness.  
27  
28

29  
30 Specifically, all of patients, professionals and healthcare systems need to be prepared in  
31 advance of case-finding. Firstly, for patients, experience with the diagnostic disclosure of  
32 illnesses such as dementia and cancer suggests that acceptance is facilitated by a series of  
33 negotiated steps rather than a 'one-off' process [43 44]. For example, patients in our study  
34 indicated they would have been more receptive to case-finding had they received  
35 information beforehand about the higher prevalence of depression in chronic physical illness.  
36  
37 It is also possible that the act of case-finding does form an initial step in helping patients  
38 consider and come to terms with a diagnosis of depression, given that we found screen  
39 negative patients subsequently consulted with mood problems. Secondly, professional  
40  
41  
42  
43  
44  
45  
46  
47  
48  
49  
50  
51  
52  
53  
54  
55  
56  
57  
58  
59  
60



1  
2  
3 attitudes towards and skills required in the detection of depression need to be examined.  
4  
5 Some voiced unease about whether they were incorporating the questions correctly within  
6  
7 consultations or uncertainty about how to handle potential new diagnoses, particularly  
8  
9 nursing staff. Thirdly, resources and care pathways need to be optimised to accommodate  
10  
11 detection and follow up. Patients identified through case-finding are more likely to have  
12  
13 mild-moderate rather than severe depression and less likely to benefit from antidepressant  
14  
15 treatment [45 46]. Resources are needed to manage those identified through case-finding  
16  
17 recommended by clinical guidelines. Health professionals were understandably reluctant to  
18  
19 open up a “can of worms” during tightly restricted chronic illness reviews; the exploration of  
20  
21 sensitive issues requires greater flexibility in consultation time. We also found instances  
22  
23 where screen-positives were not acted upon given the absence of explicitly agreed pathways  
24  
25 within practices.  
26

27  
28 There are more general lessons beyond depression detection. Mood disorders are not the  
29  
30 only sensitive issue raised during chronic illness reviews. Our findings should prompt a  
31  
32 reappraisal of how such reviews are designed and implemented for other emotionally-laden  
33  
34 problems integral to chronic illness care, such as weight management, sexual dysfunction  
35  
36 and alcohol misuse [47]. Health professionals may welcome structured protocols to help  
37  
38 ensure coverage of key issues; there is evidence that prompting interventions have a small  
39  
40 to modest effect on practice and patient outcomes [48]. However, such approaches have  
41  
42 been less successful in addressing relatively complex clinical behaviours, especially for  
43  
44 chronic illness management [49]. The subsequent challenge for quality improvement  
45  
46 programmes and research is to further explore and evaluate how to develop interventions  
47  
48 which can be embedded within primary care systems and consultations to improve  
49  
50 population outcomes whilst preserving patient-centred care. The National Institute for Health  
51  
52 and Care Excellence guidance on implementation recommends direct observation of  
53  
54 practice as one way to identify potential barriers to changing practice [50] and although we  
55  
56 have demonstrated the value of direct observation in evaluating new policy initiatives  
57  
58  
59  
60

1  
2  
3 compared to (say) interview studies alone, it is not routinely undertaken when introducing  
4 new QOF indicators[11].  
5  
6

7 Incentivised case-finding exacerbated tensions between perceived patient-centredness and  
8 the time-limited routine of the consultation. Both professionals and patients reacted to the  
9 imposition of case-finding by adapting, or even subverting, the process recommended by  
10 national guidance. Despite their apparent simplicity, the case-finding questions are not  
11 consultation-friendly, and acceptable alternative ways to raise mood disorders merit further  
12 exploration, as well as guidance on how to introduce the questions so patients don't feel  
13 depression is something that happens to 'other people' as our patient's awareness theme  
14 suggests. If case-finding is to be recommended for other patient groups, practice teams  
15 need clearer guidance on the pathway for people with likely depression which can be  
16 accommodated within available systems and resources.  
17  
18  
19  
20  
21  
22  
23  
24  
25  
26  
27

28  
29 **What is already known on this topic**

- 30  
31  
32  
33  
34  
35  
36  
37  
38  
39
- Case-finding for depression was incentivised in UK primary care to increase depression diagnosis and management.
  - Evidence that case-finding has improved depression outcomes is lacking and health care professionals have expressed dissatisfaction with its implementation.

40  
41 **What this study adds**

- 42  
43  
44  
45  
46  
47  
48  
49  
50  
51
- Patients and health care professionals subverted the standardised process of depression case-finding to suit their consultation style and needs.
  - Case-finding needs to be aligned with structured care processes and how healthcare professionals and patients think about mood problems in chronic physical disease.

### **Ethics Approval**

This study was approved by the South West - Exeter Research Ethics Committee (reference 11/SW/0335). The participants gave informed consent before taking part.

### **Funding**

This paper summarises independent research funded by the National Institute for Health Research (NIHR) under its Research for Patient Benefit (RfPB) Programme (Grant Reference Number PB-PG-0110-21046). The views expressed are those of the authors and not necessarily those of the NHS, the NIHR or the Department of Health. Study sponsors, the University of Leeds, and NIHR RfPB had no role in study design, in the collection, analysis and interpretation of data, in the writing of the report, and in the decision to submit the article for publication. All authors had full access to all of the data in the study and can take responsibility for the integrity of the data and the accuracy of the data analysis.

### **Transparency Declaration**

Dr Sarah L Alderson, the lead author (the manuscript's guarantor), affirms that the manuscript is an honest, accurate, and transparent account of the study being reported; that no important aspects of the study have been omitted; and that any discrepancies from the study as planned have been explained.

### **Data sharing statement**

Data sharing: no additional data available.

### **Contributorship Statement**

RF and AH conceived the project. RF was principal investigator. SA and KM designed the study. SA and AR were responsible for running the project. AR was responsible for data collection. All authors interpreted the data and findings. SA wrote the first draft of the manuscript. RF commented on the first draft and all authors commented on further revisions. SA is guarantor of the paper.

### Competing interests

All authors received funding from National Institute of Health Research to undertake this study.

For peer review only

## References

1. Goldney RD, Phillips PJ, Fisher LJ, et al. Diabetes, Depression, and Quality of Life. *Diabetes Care* 2004;**27**(5):1066-70 doi: 10.2337/diacare.27.5.1066[published Online First: Epub Date] | .
2. Rudisch B, Nemeroff CB. Epidemiology of comorbid coronary artery disease and depression. *Biological Psychiatry* 2003;**54**(3):227-40
3. Carney RM, Freedland KE, Miller GE, et al. Depression as a risk factor for cardiac mortality and morbidity: A review of potential mechanisms. *Journal of Psychosomatic Research* 2002;**53**(4):897-902
4. Anderson RJ, Freedland KE, Clouse RE, et al. The Prevalence of Comorbid Depression in Adults With Diabetes: A meta-analysis. *Diabetes Care* 2001;**24**(6):1069-78 doi: 10.2337/diacare.24.6.1069[published Online First: Epub Date] | .
5. Simon GE, VonKorff M. Recognition, management, and outcomes of depression in primary care. 1995(2):99-105
6. Barth J, Schumacher M, Herrmann-Lingen C. Depression as a Risk Factor for Mortality in Patients With Coronary Heart Disease: A Meta-analysis. *Psychosom. Med.* 2004;**66**(6):802-13 doi: 10.1097/01.psy.0000146332.53619.b2[published Online First: Epub Date] | .
7. Katon W, Ciechanowski P. Impact of major depression on chronic medical illness. *Journal of Psychosomatic Research* 2002;**53**(4):859-63
8. National Institute of Clinical Excellence. Depression in adults with a chronic physical health problem: treatment and management. NICE. : NICE, 2009.
9. New Zealand Guidelines Group. Identification of Common Mental Disorders and Management of Depression in Primary Care. An Evidence-based Best Practice Guideline. Wellington, 2008.
10. US Preventative Services Task Force. Screening for Depression in Adults: U.S. Preventive Services Task Force Recommendation Statement. *Annals of Internal Medicine* 2009;**151**(11):784-92 doi: 10.1059/0003-4819-151-11-200912010-00006[published Online First: Epub Date] | .
11. University of Birmingham and University of York Health Economics Consortium. NM49 indicator development feedback report 2012.
12. BMJ Best Practice. Screening: Patient Health Questionnaire-2 (PHQ-2). *BMJ Best Practice* 2010. <http://bestpractice.bmj.com/best-practice/monograph/55/prevention.html>.
13. Health and Social Care Information Centre. Quality Outcomes Framework 2012/13 results. Secondary Quality Outcomes Framework 2012/13 results 2013. <http://qof.hscic.gov.uk/index.asp>.
14. Gilbody S, Sheldon T, House A. Screening and case-finding instruments for depression: a meta-analysis. *Canadian Medical Association Journal* 2008;**178**(8):997-1003 doi: 10.1503/cmaj.070281[published Online First: Epub Date] | .
15. Dowrick C, Buchan I. Twelve month outcome of depression in general practice: does detection or disclosure make a difference? *BMJ* 1995;**311**(7015):1274-76
16. Gilbody SM, House A, Sheldon T. Screening and case finding instruments for depression [Systematic Review]. *Cochrane Database of Systematic Reviews* 2009;**3**:3
17. Pignone MP, Gaynes BN, Rushton JL, et al. Screening for Depression in Adults: A Summary of the Evidence for the U.S. Preventive Services Task Force. *Annals of Internal Medicine*

- 2002;**136**(10):765-76 doi: 10.7326/0003-4819-136-10-200205210-00013[published Online First: Epub Date]].
18. Gilbody S, Sheldon T, Wessely S. Should we screen for depression? *BMJ* 2006;**332**(7548):1027-30 doi: 10.1136/bmj.332.7548.1027[published Online First: Epub Date]].
19. National Screening Committee. Programme Appraisal Criteria. Secondary Programme Appraisal Criteria 2013. [www.screening.nhs.uk/criteria](http://www.screening.nhs.uk/criteria).
20. Serumaga B, Ross-Degnan D, Avery A, et al. Effect of pay for performance on the management and outcomes of hypertension in the United Kingdom: interrupted time series study. *BMJ* 2011;**342**:d108
21. Campbell SM, Reeves D, Kontopantelis E, et al. Effects of Pay for Performance on the Quality of Primary Care in England. *N Engl J Med* 2009;**361**:368-78
22. Scott A, Sivey P, Ait Ouakrim D, et al. The effect of financial incentives on the quality of health care provided by primary care physicians. *Cochrane Database Syst Rev* 2011(9):CD008451
23. Checkland K, Harrison S, McDonald R, et al. Biomedicine, holism and general medical practice: responses to the 2004 General Practitioner contract. *Sociology of Health and Illness* 2008;**30**:788-803
24. McDonald R, Harrison S, Checkland K, et al. Impact of financial incentives on clinical autonomy and internal motivation in primary care: ethnographic study. *BMJ* 2007;**334**(7608):1333-34
25. Maisey S, Steel N, Marsh R, et al. Effects of payment for performance in primary care: qualitative interview study. *Journal of Health Services Research & Policy* 2008;**13**(3):133-39 doi: 10.1258/jhsrp.2008.007118[published Online First: Epub Date]].
26. Mitchell C, Dwyer R, Hagan T, et al. Impact of the QOF and the NICE guideline in the diagnosis and management of depression: a qualitative study. *Br. J. Gen. Pract.* 2011;**61**(586):e279-e89 doi: 10.3399/bjgp11X572472[published Online First: Epub Date]].
27. Coventry PA, Hays R, Dickens C, et al. Talking about depression: a qualitative study of barriers to managing depression in people with long term conditions in primary care. *BMC Fam Pract* 2011;**12**:10 doi: 10.1186/1471-2296-12-10[published Online First: Epub Date]].
28. Dowrick C, Leydon GM, McBride A, et al. Patients' and doctors' views on depression severity questionnaires incentivised in UK quality and outcomes framework: qualitative study. *Br. Med. J.* 2009;**338**:6 doi: b663  
10.1136/bmj.b663[published Online First: Epub Date]].
29. McLintock K, Russell A, West R, et al. Effect of financial incentives on screening for depression in patients with chronic disease in the United Kingdom: an interrupted time series study. Manuscript in preparation 2013
30. Practitioners RCoG. Supporting Carers: An action guide for general practitioners and their teams.: Royal College of General Practitioners, 2011.
31. Burden AD, Boon MH, Leman J, et al. Diagnosis and management of psoriasis and psoriatic arthritis in adults: summary of SIGN guidance. *BMJ* 2010;**341** doi: 10.1136/bmj.c5623[published Online First: Epub Date]].
32. Collier F, Smith RC, Morton CA. Diagnosis and management of hidradenitis suppurativa. *BMJ* 2013;**346** doi: 10.1136/bmj.f2121[published Online First: Epub Date]].
33. Emerson RM, Fretz RI, Shaw LL. *Writing ethnographic fieldnotes*. 2nd ed: University of Chicago Press, 2011.

- 1  
2  
3 34. Anekwe L. QOF depression indicators face axe. Pulse 2011(June 2011)
- 4  
5 35. Chew-Graham CA, Hunter C, Langer S, et al. How QOF is shaping primary care review  
6 consultations: a longitudinal qualitative study. BMC Fam Pract 2013;**14**(1):103
- 7  
8 36. Campbell SM, McDonald R, Lester H. The experience of pay for performance in English family  
9 practice: a qualitative study. Annals of Family Medicine 2008;**6**(3):228-34
- 10  
11 37. Hannon KL, Lester HE, Campbell SM. Patients' views of pay for performance in primary care: a  
12 qualitative study. Br. J. Gen. Pract.;**62**(598):e322-e28 doi: 10.3399/bjgp12X641438[published  
13 Online First: Epub Date]].
- 14  
15 38. Lester H, Matharu T, Mohammed MA, et al. Implementation of pay for performance in primary  
16 care: a qualitative study 8 years after introduction. Br. J. Gen. Pract. 2013;**63**(611):e408-e15  
17 doi: 10.3399/bjgp13X668203[published Online First: Epub Date]].
- 18  
19 39. Rousseau N, McColl E, Newton J, et al. Practice based, longitudinal, qualitative interview study of  
20 computerised evidence based guidelines in primary care. BMJ 2003;**326**(7384):314 doi:  
21 10.1136/bmj.326.7384.314[published Online First: Epub Date]].
- 22  
23 40. Craig P, Dieppe P, Macintyre S, et al. Developing and evaluating complex interventions: the new  
24 Medical Research Council guidance. BMJ 2008;**337** doi: 10.1136/bmj.a1655[published Online  
25 First: Epub Date]].
- 26  
27 41. Dixon-Woods M, Leslie M, Bion J, et al. What Counts? An Ethnographic Study of Infection Data  
28 Reported to a Patient Safety Program. Milbank Quarterly 2012;**90**(3):548-91 doi:  
29 10.1111/j.1468-0009.2012.00674.x[published Online First: Epub Date]].
- 30  
31 42. Public Health England. National General Practice Profiles - Leeds PCT. Secondary National  
32 General Practice Profiles - Leeds PCT 2013.  
33 [http://www.apho.org.uk/PracProf/Profile.aspx#mod,2,pyr,2012,pat,2,par,E16000074,are,-](http://www.apho.org.uk/PracProf/Profile.aspx#mod,2,pyr,2012,pat,2,par,E16000074,are,-sid1,2000002,ind1,243-4,sid2,2000005,ind2,-)  
34 [sid1,2000002,ind1,243-4,sid2,2000005,ind2,-](http://www.apho.org.uk/PracProf/Profile.aspx#mod,2,pyr,2012,pat,2,par,E16000074,are,-sid1,2000002,ind1,243-4,sid2,2000005,ind2,-)
- 35  
36 43. Fallowfield L, Jenkins V. Effective communication skills are the key to good cancer care. European  
37 journal of cancer (Oxford, England : 1990) 1999;**35**(11):1592-7
- 38  
39 44. Lecouturier J, Bamford C, Hughes J, et al. Appropriate disclosure of a diagnosis of dementia:  
40 identifying the key behaviours of 'best practice'. BMC Health Services Research 2008;**8**(1):1-  
41 10 doi: 10.1186/1472-6963-8-95[published Online First: Epub Date]].
- 42  
43 45. Coyne JC, Schwenk TL, Fechner-Bates S. Nondetection of depression by primary care physicians  
44 reconsidered. General Hospital Psychiatry 1995;**17**(1):3-12 doi:  
45 [http://dx.doi.org/10.1016/0163-8343\(94\)00056-J](http://dx.doi.org/10.1016/0163-8343(94)00056-J)[published Online First: Epub Date]].
- 46  
47 46. Arroll B, Goodyear-Smith F, Crengle S, et al. Validation of PHQ-2 and PHQ-9 to screen for major  
48 depression in the primary care population. Ann Fam Med 2010;**8**(4):348-53 doi:  
49 10.1370/afm.1139[published Online First: Epub Date]].
- 50  
51 47. Crosson JC, Heisler M, Subramanian U, et al. Physicians' Perceptions of Barriers to Cardiovascular  
52 Disease Risk Factor Control among Patients with Diabetes: Results from the Translating  
53 Research into Action for Diabetes (TRIAD) Study. The Journal of the American Board of  
54 Family Medicine 2010;**23**(2):171-78 doi: 10.3122/jabfm.2010.02.090125[published Online  
55 First: Epub Date]].
- 56  
57 48. Shojania Kaveh G, Jennings A, Mayhew A, et al. The effects of on-screen, point of care computer  
58 reminders on processes and outcomes of care. Cochrane Database of Systematic Reviews  
59 2009; (3). <http://onlinelibrary.wiley.com/doi/10.1002/14651858.CD001096.pub2/abstract>.
- 60  
61 49. Grimshaw JM, Eccles MP, Lavis JN, et al. Knowledge translation of research findings.  
62 Implementation Science 2012;**7**(50):1-29

1  
2  
3 50. National Institute for Health and Care Excellence. Into practice guide: Using NICE guidance and  
4 quality standards to improve practice, 2013.  
5  
6  
7  
8  
9  
10  
11  
12  
13  
14  
15  
16  
17  
18  
19  
20  
21  
22  
23  
24  
25  
26  
27  
28  
29  
30  
31  
32  
33  
34  
35  
36  
37  
38  
39  
40  
41  
42  
43  
44  
45  
46  
47  
48  
49  
50  
51  
52  
53  
54  
55  
56  
57  
58  
59  
60

For peer review only



**Table 1 – Observed practice characteristics**

| Surgery    | QOF score* | List Size* | Deprivation Score* | Patients Recruited |
|------------|------------|------------|--------------------|--------------------|
| Practice A | Low        | Low        | Low                | 3                  |
| Practice B | Low        | High       | High               | 13                 |
| Practice C | Low        | High       | Low                | 5                  |
| Practice D | High       | High       | Low                | 6                  |
| Practice E | High       | High       | High               | 6                  |
| Practice F | High       | Low        | High               | 5                  |
| Practice G | Low        | High       | Low                | 5                  |
| Practice H | Low        | Low        | Low                | 5                  |
| Practice I | High       | High       | Low                | 4                  |
| Practice J | Low        | Low        | High               | 5                  |
| Practice K | Low        | Low        | High               | 4                  |
| Practice L | High       | Low        | Low                | 2                  |

\* Compared to Primary Care Trust median

Table 2 - Patient demographics in observed consultations

|                                                | <u>No. of patients</u> | <u>% of patients</u> |
|------------------------------------------------|------------------------|----------------------|
| <b><u>Gender</u></b>                           |                        |                      |
| Female                                         | 21                     | 33%                  |
| Male                                           | 42                     | 67%                  |
| <b><u>Age group</u></b>                        |                        |                      |
| 18-30                                          | 7                      | 11%                  |
| 31-50                                          | 5                      | 8%                   |
| 51-64                                          | 18                     | 29%                  |
| 65-79                                          | 28                     | 44%                  |
| 80+                                            | 5                      | 8%                   |
| <b><u>Chronic Illness</u></b>                  |                        |                      |
| CHD                                            | 13                     | 21%                  |
| DM                                             | 46                     | 73%                  |
| CHD & DM                                       | 4                      | 6%                   |
| <b><u>Ethnicity</u></b>                        |                        |                      |
| White British                                  | 49                     | 78%                  |
| Mixed British                                  | 1                      | 2%                   |
| White Irish                                    | 2                      | 3%                   |
| Chinese                                        | 1                      | 2%                   |
| Black Caribbean                                | 5                      | 8%                   |
| Pakistani                                      | 3                      | 5%                   |
| British Asian                                  | 1                      | 2%                   |
| Indian                                         | 1                      | 2%                   |
| <b><u>Previous diagnosis of depression</u></b> |                        |                      |
| Yes                                            | 9                      | 14%                  |
| No                                             | 54                     | 86%                  |

Figure 1. Flow chart of idealised depression case-finding process and barriers identified.

1  
2  
3  
4  
5  
6  
7  
8  
9  
10  
11  
12  
13  
14  
15  
16  
17  
18  
19  
20  
21  
22  
23  
24  
25  
26  
27  
28  
29  
30  
31  
32  
33  
34  
35  
36  
37  
38  
39  
40  
41  
42  
43  
44  
45  
46  
47  
48  
49  
50  
51  
52  
53  
54  
55  
56  
57  
58  
59  
60

**Incentivised case finding for depression in patients with chronic heart disease and diabetes in primary care: an ethnographic study**

Sarah L Alderson, Amy M Russell, Kate McLintock, Barbara Potrata, Allan House, Robbie Foy

Leeds Institute of Health Sciences, Charles Thackrah Building, University of Leeds, 101 Clarendon Road, Leeds, LS2 9LJ. Sarah L Alderson  
Clinical Lecturer in Primary Care

Leeds Institute of Health Sciences, Charles Thackrah Building, University of Leeds, 101 Clarendon Road, Leeds, LS2 9LJ. Amy M Russell  
Senior Research Fellow

Leeds Institute of Health Sciences, Charles Thackrah Building, University of Leeds, 101 Clarendon Road, Leeds, LS2 9LJ. Kate McLintock  
Clinical Lecturer in Primary Care

Leeds Institute of Health Sciences, Charles Thackrah Building, University of Leeds, 101 Clarendon Road, Leeds, LS2 9LJ. Barbara Potrata  
Research Fellow

Leeds Institute of Health Sciences, Charles Thackrah Building, University of Leeds, 101 Clarendon Road, Leeds, LS2 9LJ. Allan House  
Professor of Liaison Psychiatry

Leeds Institute of Health Sciences, Charles Thackrah Building, University of Leeds, 101 Clarendon Road, Leeds, LS2 9LJ. Robbie Foy  
Professor of Primary Care

The Corresponding Author has the right to grant on behalf of all authors and does grant on behalf of all authors, a worldwide licence to the Publishers and its licensees in perpetuity, in all forms, formats and media (whether known now or created in the future), to i) publish, reproduce, distribute, display and store the Contribution, ii) translate the Contribution into other languages, create adaptations, reprints, include within collections and create summaries, extracts and/or, abstracts of the Contribution, iii) create any other derivative work(s) based on the Contribution, iv) to exploit all subsidiary rights in the Contribution, v) the inclusion of electronic links from the Contribution to third party material where-ever it may be located; and, vi) licence any third party to do any or all of the above.

**Style Definition:** Normal: Font: (Default) Arial, 12 pt, Space Before: 6 pt, After: 0 pt, Don't adjust space between Latin and Asian text, Don't adjust space between Asian text and numbers

**Formatted:** Font: +Body CS (Arial), 11 pt

**Formatted:** Font: +Body CS (Arial)

**Formatted:** Font: (Default) +Body CS (Arial), 11 pt

**Formatted:** Font: +Body CS (Arial)

**Formatted:** Font: (Default) +Body CS (Arial), 11 pt

**Formatted:** Font: +Body CS (Arial)

**Formatted:** Font: (Default) +Body CS (Arial), 11 pt

**Formatted:** Font: +Body CS (Arial)

**Formatted:** Font: (Default) +Body CS (Arial), 11 pt

**Formatted:** Font: +Body CS (Arial)

**Formatted:** Font: (Default) +Body CS (Arial), 11 pt

**Formatted:** Font: +Body CS (Arial)

**Formatted:** Font: (Default) +Body CS (Arial), 11 pt

**Formatted:** Font: +Body CS (Arial)

**Formatted:** Font: (Default) +Body CS (Arial), 11 pt

**Formatted:** Font: +Body CS (Arial)

**Formatted:** Font: (Default) +Body CS (Arial), 11 pt

**Formatted:** Font: +Body CS (Arial)

**Formatted:** Font: (Default) +Body CS (Arial), 11 pt

**Formatted:** Font: +Body CS (Arial)

**Formatted:** Font: (Default) +Body CS (Arial), 11 pt

## Abstract

### Objective-

To examine the process of case-finding for depression in people with diabetes and coronary heart disease within the context of a pay-for-performance scheme.

### Design

Ethnographic study drawing upon observations of practice routines and consultations, debriefing interviews with staff and patients, and review of patient records.

### Setting

General practices in Leeds, United Kingdom.

### Participants-

Twelve purposively sampled practices with a total of 119 staff; 63 consultation observations; and 57 patient interviews.

### Main outcome measure-

Audio-recorded consultations and interviews with patients and health care professionals

along with observation field notes were thematically analysed using a constant

comparison and contrastive approach. We assessed outcomes of screening case-

finding from patient records.

### Results-

Case-finding exacerbated the discordance between patient and professional agendas, the

latter already dominated by the need for a tightly structured and time-limited interaction to

document performance nature of chronic illness reviews. Professional beliefs and abilities

affected how case-finding was undertaken; there was uncertainty about how to ask the

questions, particularly amongst nursing staff. Professionals were often wary of opening an

emotional "can of worms." Subsequently, patient responses potentially suggesting emotional

1  
2  
3  
4  
5  
6  
7 problems could be prematurely shut down by professionals. ~~Screened patients~~Patients did  
8 not understand why they were asked questions about depression. This sometimes led to  
9 defensive or even defiant answers to case-finding. Follow up of patients highlighted  
10 inconsistent systems and lines of communication for dealing with screened positive cases.  
11  
12

### 13 14 *Conclusions*

15  
16 Case-finding does not fit naturally within consultations; both professional and patient  
17 reactions somewhat subverted the process recommended by national guidance. Quality  
18 improvement strategies will need to take account of our results in two ways. First, despite  
19 their apparent simplicity, the case-finding questions are not consultation-friendly, and  
20 acceptable alternative ways to ~~encourage raising~~raise the issue of depression need to be  
21 supported. Second, ~~practice teams need clearer guidance on the pathway for people~~  
22 ~~with likely depression~~case-finding needs to operate structured pathways which can be  
23  
24  
25  
26  
27  
28  
29 accommodated within available systems and resources.  
30

### 31 32 **Strengths and limitations of this study**

#### 33 34 **Strengths**

- 35  
36 • Multi-site ethnography of ~~typical~~broadly representative general practices
- 37  
38 • Triangulation through use of multiple sources of data

#### 39 40 **Limitations**

- 41  
42 • Potential for clinician and patient behaviour to alter as a response to being observed
- 43  
44 • Short periods of observation in each practice limiting range of types of behaviour  
45  
46 observed
- 47  
48 • Observations within one geographical area, thereby potentially limiting  
49  
50 generalisability  
51  
52

## Introduction

The detection and management of depression associated with chronic physical illness represents a major challenge for primary care. Depression affects around a third of people with twice as common in those with chronic physical illness such as coronary heart disease (CHD) and a quarter of those with diabetes compared to those without chronic physical illness [1-4]. Such co-morbidity can make depression hard to recognize, especially as symptoms of depression (such as fatigue) overlap with those of chronic physical illnesses [5]. Co-morbidity is also associated with poorer outcomes, including mortality [3 6 7]. One response is case-finding, defined as selective screening for depression in populations at high risk, such as those with chronic illness. This has been recommended by national guidance in the UK [8] and elsewhere. [9 10]. The Quality Outcomes Framework (QOF), a pay-for-performance scheme in UK primary care, rewarded depression case-finding using two standard screening questions from the Patient Health Questionnaire-2 (PHQ-2) in all patients with coronary heart disease (CHD) or diabetes [11]. The PHQ-2 asks: 'In the past two weeks, have you been bothered by: Little interest or pleasure in doing things; and feeling down, depressed or hopeless?' [12]. Routine data suggested high levels of screening, with a national average of 86% of eligible patients screened in 2011-12 [13].

However, there are problems with both the rationale underpinning this recommendation and the means undertaken to promote its implementation in the UK.

Firstly, there is no evidence that screening case-finding for depression by itself improves patient outcomes [14]. For screening case-finding to be effective it is important that case finding-detected potential cases are further assessed, diagnosed and offered appropriate clinical management within a structured clinical pathway [15-17]. There is no closely allied incentive in the QOF programme for subsequent patient care. There was no closely allied incentive in the QOF programme for subsequent patient care. Case-finding

Formatted: Font: (Default) +Body CS (Arial), Bold

Formatted: Font: +Body CS (Arial)

Formatted: Font: +Body CS (Arial), 11 pt

1  
2  
3  
4  
5  
6  
7 should also be considered against other recommended criteria for screening tests, such as  
8 acceptability and having an agreed policy about whom to treat as patients [18 19].

Formatted: Font: +Body CS (Arial), 11 pt

9  
10 Secondly, evidence on the effects of financial incentives on primary care practice is, at best,  
11 mixed ~~[18-20]~~[20-22]. There are concerns that such incentives undermine professionals'  
12 intrinsic motivation, patient-centeredness, and continuity of care and have led to a 'tick box'  
13 culture as health professionals work through checklists for chronic illness management ~~[19~~  
14 ~~24-23]~~[21 23-25]. Health professionals themselves have expressed dissatisfaction with  
15 incentivised depression management, particularly the use of incentivised depression severity  
16 measurements, [24-25][26-28].

Formatted: Font: +Body CS (Arial), 11 pt

17  
18 Our accompanying interrupted time series analysis found that incentivised case finding  
19 increased new depression-related diagnoses in people with diabetes and CHD and  
20 perpetuated rising trends in new prescriptions of antidepressants, ~~[26]. Even though this~~  
21 ~~incentivised case finding stopped~~[29]. Even though this incentivised case finding ceased,  
22 in 2012, there are continuing calls for 'something to be done' to detect and treat depression  
23 in high risk groups ~~[27-29]~~[30-32]. However, the professional and patient experiences of  
24 incentivised case-finding, how it affected clinical care, and its fit with the routines of practice  
25 life are poorly understood. We investigated the process of incentivised case-finding during  
26 scheduled and opportunistic reviews of patients with diabetes and CHD.

Formatted: Font: +Body CS (Arial), 11 pt

## 41 **Methods**

Formatted: Font: (Default) +Body CS (Arial), Bold

Formatted: Font: +Body CS (Arial)

### 43 *Design and setting*

Formatted: Font: +Body CS (Arial), 11 pt

44  
45 Our ethnographic design combined direct observation with interviews and review of patient  
46 records. We wanted to build an in-depth understanding of how patient case-finding was  
47 conducted within the context of everyday practice life and routine patient care. The study  
48 took place in general practices in Leeds, UK.

Formatted: Font: +Body CS (Arial), 11 pt

### Participants

We invited all practices in Leeds to participate. We then sought a purposive sample of practices using a four-by-two sampling frame based upon whether practice QOF achievement was above or below the Leeds median, further stratified by list size and deprivation profiles. Practices that consented to participate were booked for a week of observation, during which we aimed to observe at least three consultations.

Practices sent letters of invitation and information packs to patients scheduled for chronic disease reviews within the observation week. We also approached patients attending for routine consultations to enable observation of opportunistic case-finding. Practice staff identified patients due to be asked the case-finding questions and asked if they would be interested in participating when they arrived at reception for their appointment. All patients and professionals subsequently observed gave informed consent.

### Data collection and analysis

An ethnographer (AR) used a funnelling approach to observe and describe the context of and behaviours within the practice [30][33], moving to detailed observation and audio-recording of consultations. Observation considered both verbal and non-verbal features including: how case-finding questions are framed and asked; events leading up to questioning; patient verbal and non-verbal reactions and responses; and overall style of the consultation. This style of observation allowed the researcher to layer the analysis of the consultations with contextual information providing a richer interpretation of the observation data. She held semi-structured debriefing interviews with patients who had been observed ~~being screened~~. The interviews aimed to explore patient views on the process and experience of the consultation in further depth. Unstructured interviews took place with the health care professionals involved in depression case-finding and notes taken on all discussions regarding depression case-finding. We reviewed patients' medical records six weeks after ~~observed screening~~ observation to check for any subsequent clinical events

Formatted: Font: +Body CS (Arial), 11 pt



related to depression identification and management. Events included appointments where mood was discussed, telephone consultations, depression severity assessments, referrals to mental health teams or talking therapies and new prescriptions for depression medication.

Formatted: Font: +Body CS (Arial), 11 pt

The perceived relative importance and organisation of QOF-related case-finding may vary throughout the year. To partly ameliorate this we observed two practices towards the end of the financial year when practices are typically working hardest to achieve QOF targets.

Formatted: Font: +Body CS (Arial), 11 pt

Transcribed data (interviews, observation transcripts and observation notes) were managed using NVivo9 and coded for themes. Thematic analysis was undertaken by two researchers, independently coding for the themes and then comparing codes and themes. The analysis was further refined by using constant comparison and contrastive approach of themes, and looking for negative cases in order to examine for similarities and differences within and between the patients' perception and observations in different centres. Finally, to improve reliability and validity of data, we triangulated findings from all three data sources.

Formatted: Font: +Body CS (Arial), 11 pt

#### *Ethical review*

The study was approved by National Research Ethics Service Committee South West – Exeter (11/SW/0335).

#### **Results**

Formatted: Font: (Default) +Body CS (Arial), 11 pt, Bold

Formatted: Font: +Body CS (Arial), 11 pt

Twelve practices participated and a total of 63 patient consultations were observed (range 2-13 per practice; Table 1). Practice characteristics were relatively balanced, with five having QOF achievement above the median for Leeds, five above median population deprivation scores, and six above median list size. Patients were mostly most commonly male, age 51-79 years, and white British (Table 2). Most (79.73%) participants had diabetes and nine (14%) had a previous diagnosis of depression. Nine of the observed case findings took place 'opportunistically' within routine GP appointments. The rest occurred within dedicated chronic disease clinics, usually with nurses.

Formatted: Font: +Body CS (Arial), 11 pt

Formatted: Font: +Body CS (Arial), 11 pt

1  
2  
3  
4  
5  
6  
7 ~~Six key themes emerged~~Based upon available guidance, observations and interviews, we  
8  
9 ~~constructed a basic normative model of the process by which case-finding was expected to~~  
10 ~~improve depression detection and treatment (Figure 1). We then identified a number of~~  
11 ~~ways in which professional and patient behaviours and beliefs and the working patterns of~~  
12 ~~general practices subverted or affected the operation of this model. We found five barriers:~~

13  
14  
15  
16 discordance between patient and professional agendas; professional ~~beliefs~~  
17 ~~affecting~~uncertainty around how ~~screening was undertaken;~~to undertake the case-finding  
18 ~~as opening~~itself; reluctance to open a “can of worms”; ~~patient existential beliefs affecting~~  
19 ~~their responses;~~patients being unaware of depression risk or case-finding ~~as a means to~~  
20 ~~reduce stigma~~taking place; and ~~competing~~ practice priorities and ~~organisation~~inconsistent  
21 ~~lines of communication around the management of potential cases of depression.~~

Formatted: Font: +Body CS (Arial), 11 pt

22  
23  
24  
25  
26  
27  
28 *Discordance between patient and professional agendas*

29  
30 Case-finding ~~exacerbated the discordance between the patient and professional~~  
31 ~~agendas, the latter already dominated by the need for~~often occurred within tightly

32  
33 structured and time-limited ~~interaction~~chronic illness reviews required to document QOF

34  
35 processes ~~of care, and appeared to exacerbate existing discordance.~~ This led to

36  
37 professionals disregarding attempts by patients to steer the consultation around to their own  
38 perceived needs. Patients were often not focused on ~~and often did not understand the~~

39  
40 ~~purpose of~~the review process and used the consultation as an opportunity to raise other

41  
42 problems. ~~Professionals~~To manage this, ~~professionals~~often interrupted patients or

43  
44 returned the consultation to its purpose, discounting clues that the patient had worries  
45 related to the chronic disease being reviewed or other illnesses.

46  
47 Patient: [talking about hypoglycaemic attacks] ~~which were a subject of significant~~

48  
49 ~~anxiety for this patient (revealed in interview after appointment)]~~ Only time that I went

50  
51 ~~funny, I had a tooth out and I'd had, I couldn't have any breakfast, or I didn't have any~~

Formatted: Font: +Body CS (Arial), 11 pt

1  
2  
3  
4  
5  
6  
7 breakfast, because I don't like to be poorly when I've had teeth out, because I used  
8 to be when I was younger, am I talking and disturbing...

9  
10 [Fieldnote] Nurse is trying to measure blood pressure; patient looks agitated.

11  
12 Nurse: Yes, I think you just probably need to just be quiet for a couple of minutes  
13 while I check it, because it's even higher now! We want it to go down! Just try and  
14 relax. OK. Observation 29

15  
16  
17  
18 At this stage in the consultation the patient became distressed, apparently wishing to discuss  
19 further their worries about hypoglycaemia. ~~This illustrates the restrictive context of~~  
20 ~~disease reviews — in this case hampering further exploration of patient concerns that~~  
21 ~~might have uncovered. The professional subsequently moved the conversation on to~~  
22 ~~another QOF target and no follow up of concerns about hypoglycaemia was arranged. The~~  
23 ~~patient later told the researcher she was extremely worried about hypos and was~~  
24 ~~experiencing consistently low mood and high anxiety. The context of chronic illness reviews~~  
25 ~~was restrictive – in this case an opportunity for direct, subject specific case-finding was~~  
26 ~~missed because of the necessity to ask about and record other items. This represents a~~  
27 ~~missed opportunity for case-finding at a point in the review when the patient might have~~  
28 ~~been receptive to exploring~~ associated mood problems.

29  
30  
31  
32  
33  
34  
35  
36  
37  
38 Difficulties arose in the consultation when the patient mentioned something that was  
39 perceived to be important but unrelated to the review. Sometimes the review had to be  
40 abandoned as the patient's agenda became too important to be ignored, or the patient too  
41 distressed to continue concentrating on the review. This more patient-centred approach  
42 appeared to occur more often in practices that had lower than average QOF achievement,  
43 suggesting that such practices traded off potential income against responsiveness to  
44 patients.

45  
46  
47  
48 Professional ~~beliefs affecting uncertainty around~~ how to undertake the case-finding was  
49 approached itself.

Formatted: Font: +Body CS (Arial), 11 pt

Formatted: Font: +Body CS (Arial), 11 pt, Not Italic

Formatted: Font: +Body CS (Arial), 11 pt

Formatted: Space Before: 0 pt, After: 0 pt

Formatted: Font: +Body CS (Arial), 11 pt

Professional beliefs and abilities affected how case-finding was undertaken. ~~They~~  
~~in conversation professionals~~ expressed uncertainty about how best to phrase and ask the  
 questions, particularly nursing staff who ~~told the researcher they~~ sometimes felt insufficiently  
 trained on how to manage patients ~~who screened positive. They~~ with possible depression.  
~~When asked, they~~ questioned whether they were case-finding for QOF rather than patient  
 benefit. ~~Professionals avoided directly asking screening~~ We noticed that those who felt  
that the case-finding was for the benefit of patients appeared to work in practices that were  
in areas of low deprivation, where as those in areas of higher deprivation felt there was a  
lack of time to ask the questions ~~if they were familiar with patients but still recorded~~  
~~case finding; they believed could identify~~ and deal with any responses that might indicate  
~~a problem with~~ mood ~~changes through existing knowledge of patients. They often~~  
~~adapted the questions to suit their consultation style or perceived patient needs. In~~  
~~the context of a time-restricted consultation they felt overburdened.~~

~~Nurse: Then so do you feel ok about your diabetes, do you have any, do you worry~~  
~~about it, does it bother you at all? Observation 27~~

Field notes Practice A: [The nurse] referred to QOF as coming from “*on high*” to tell her  
 to incorporate it [case-finding]. She felt depression screening was problematic as they  
 had received “*no training*” in mental health or in screening and they were very  
 “*stretched for time in the appointment.*”

Opening ~~Professionals avoided directly asking case-finding questions if they were familiar~~  
~~with patients but still recorded case-finding; they expressed beliefs that they could identify~~  
~~mood changes through existing knowledge of patients. They often adapted the questions to~~  
~~suit their consultation style or perceived patient needs.~~

Sometimes confusion arose when the questions were framed to ask whether the patient was  
copng with their illness, rather than to assess mood disorders in general. The patient  
answered that they were managing their condition well but did not talk about their mood.

Formatted: Font: +Body CS (Arial), 11 pt

Formatted: Font: +Body CS (Arial), 11 pt, Italic

Formatted: Font: +Body CS (Arial), 11 pt

Formatted: Font: +Body CS (Arial), 11 pt, Italic

Formatted: Font: +Body CS (Arial), 11 pt

Formatted: Font: +Body CS (Arial), 11 pt, Italic

Formatted: Font: +Body CS (Arial), 11 pt

1  
2  
3  
4  
5  
6  
7 This was because the professionals believed the case-finding was to detect depression  
8 associated with chronic disease only, not depression of any cause.

9  
10 *Nurse: Then so do you feel ok about your diabetes. do you have any. do you worry*  
11 *about it. does it bother you at all? Observation 27*

Formatted: Font: +Body CS (Arial), 11 pt

12  
13  
14  
15 The case-finding questions were usually asked in the middle of chronic disease reviews.  
16 Generally the templates for such reviews were followed in order, with depression case-  
17 finding often occurring after discussion of alcohol consumption and smoking status. Once  
18 asked, the professional would move on to discuss diet and exercise. The case-finding  
19 questions appeared out of place in the consultation that mainly involved measuring physical  
20 factors rather than mood related problems. When asked about the case-finding, most  
21 nurses felt it was difficult to switch from asking something that could be measured (such as  
22 weight, units of alcohol consumed) to something more subjective.

23  
24  
25  
26  
27  
28  
29  
30 *Reluctance to open a "can of worms"*

Formatted: Space Before: 0 pt, After: 0 pt

Formatted: Font: +Body CS (Arial), 11 pt

31  
32 Professionals at nearly every practice mentioned the term "can of worms" to express unease  
33 with case-finding for depression. This metaphor indicated professional perceptions of both  
34 patient discomfort with being asked about emotions and their own emotional labour in asking  
35 the questions. "Can of worms" helped articulate the belief that case-finding for depression  
36 was anticipated as a problematic part of the consultation and threatened to derail routines.  
37 Professionals anticipated having to manage and close down answers before patients began  
38 to give them; this often informed their immediate response to patients' answers regardless of  
39 what patients said.

Formatted: Font: +Body CS (Arial), 11 pt

Formatted: Font: +Body CS (Arial), 11 pt

40  
41  
42  
43  
44  
45  
46 Many felt that by identifying a problem, it was their duty to uncover further the scale of the  
47 problem and to discuss this further with the patient, rather than requesting that the patient  
48 should make an appointment to discuss this with the doctor or when there would be more  
49 time to devote to this. It was hard to move the consultation onto the rest of the review. This  
50 often led to the questions being asked in a manner that made it difficult for the patient to

answer 'yes', such as "you have no problems coping, do you?" pre-empting any difficulties the questions may cause.

"Then Nurse 1 said "it's a question that makes you sigh, makes your heart heavy, because you're there and you say "you've been down and depressed?" and she said "loads of them saying "yes" and she's thinking 'no, you're not, you're not, depressed, depressed, you're just a bit down, a bit fed up, aren't we all!' So then she has to say "Oh, why do you think that?" and it starts this 10 minute conversation that she really didn't want to be having, because she's had to do three blood pressure readings, loads of blood tests, trouble getting a vein, had to check their feet, loads of faffing around, she's only got 20 minutes." Field notes Practice F

Patients seldom answered with a simple "yes" or "no" and brought up specific difficulties, such as bereavement. Following an initial acknowledgement, professionals then tended to move consultations on without discussing the effects of these life events on mood. Therefore, professionals prematurely shut down patient responses suggesting emotional problems to reduce the risk of extended consultations.

Nurse: Are you alright, you haven't been having little interest in doing things, or?

Patient: No, no.

Nurse: Are you fine, are you okay? That's okay.

Patient: It's been 10 years since I've lost [woman's name].

Nurse: Is it, what, is that your wife?

Patient: Yes.

Nurse: 10 years? That's a long time, isn't it? Can I just check your tablets then, do you take aspirin, [lists medication]... Observation 23.

**Patient existential beliefs affecting responses**

Some health care professionals talked about the emotional labour involved in case-finding.

Discussing depression was seen as being emotionally difficult and required feeling strong in

- Formatted: Font: +Body CS (Arial), 11 pt
- Formatted: Font: (Default) +Body CS (Arial), 11 pt, Italic
- Formatted: Font: +Body CS (Arial)
- Formatted: Font: (Default) +Body CS (Arial), 11 pt
- Formatted: Font: (Default) +Body CS (Arial), 11 pt, Italic
- Formatted: Font: +Body CS (Arial)
- Formatted: Font: (Default) +Body CS (Arial), 11 pt
- Formatted: Font: (Default) +Body CS (Arial), 11 pt, Italic
- Formatted: Font: +Body CS (Arial)
- Formatted: Font: (Default) +Body CS (Arial), 11 pt
- Formatted: Font: (Default) +Body CS (Arial), 11 pt, Italic
- Formatted: Font: +Body CS (Arial)
- Formatted: Font: (Default) +Body CS (Arial), 11 pt
- Formatted: Font: (Default) +Body CS (Arial), 11 pt, Italic
- Formatted: Font: +Body CS (Arial)
- Formatted: Font: (Default) +Body CS (Arial), 11 pt
- Formatted: Font: (Default) +Body CS (Arial), 11 pt, Italic
- Formatted: Font: (Default) +Body CS (Arial), 11 pt
- Formatted: Font: +Body CS (Arial)

1  
2  
3  
4  
5  
6  
7 themselves, in order to cope with the answer. The emotional burden was exacerbated by  
8 the professional's perception that regardless of the outcome of case-finding, there wouldn't  
9 be in any change for the better for the patient. They perceived they were expending a great  
10 deal of emotional labour on something that did not improve patient care and this  
11 compounded their feelings.

12  
13  
14  
15  
16 "[The nurse] said she screened a woman with COPD who then cried and cried and  
17 then refused help and said she would sort herself out. This woman refused support  
18 and refused to quit smoking. Then she screened a man who was overweight and  
19 she'd just told him how serious his weight was and he cried about his weight and  
20 then she offered support with mood and weight loss and he said no. So she said  
21 most often it opens a can of worms, is demanding and difficult and rarely does  
22 anything come of it." Field notes practice B

#### 23 *Patients being unaware of depression risk or case-finding taking place*

24  
25  
26  
27  
28  
29  
30  
31 Many patients screened did not see themselves as the type of people who would be prone to  
32 depression and did not understand why they were asked. ~~This sometimes led to~~  
33 ~~defensive or even defiant answers, or deflecting questions with humour.~~ They  
34 appreciated the idea that people should experience case-finding for depression but  
35 distanced themselves from the identity of those people. This sometimes led to defensive or  
36 even defiant answers, or deflecting questions with humour in an apparent attempt to  
37 illustrate how preposterous it was to suspect that they might be suffering from depression.  
38 This contradictory position of wanting everyone else to experience case-finding, seeing the  
39 purpose/necessity of asking the questions but, in contrast, not feeling they should be  
40 screened and thus derided the process or made light of it. This illustrates that the case-  
41 finding process in itself does not impact on patient self-perception of who may suffer from  
42 depression and thus does not enable them to answer the questions honestly and openly.  
43 They were concerned that they were being seen as someone who could not cope. This

Formatted: Font: +Body CS (Arial), 11 pt

especially occurred when the patient felt they had needed to be defensive over their lifestyle choices, such as diet, exercise, alcohol consumption, just before being screened. The review was seen as a 'telling off' for not doing the right things which then made it difficult to answer subjective questions about mood.

Nurse: *So during the past month have you been bothered by feeling down or depressed or hopeless at all?*

Patient looks perplexed.

Patient: *I'm always... (His voice cracks and pretends to cry and rub his eyes like a child) Am I heck!*

Fieldnote: Nurse shuffles in her seat and leans forward. She's smiling but not 100% comfortable. Observation 24.

Interviewed patients articulated the belief that the professionals would pick up mood problems or not coping without the need for such questions. They felt being aware of depression was important in a generalised context but it did not fit with who they were, and so found it hard to understand in the context of a chronic disease review.

### *Case finding as a means to reduce stigma*

~~Patients and professionals often considered that regular discussions around mood and depression helped to reduce associated stigma. Patient: *I mean if you're, if you're down they don't have to ask, they know so they start talking about it.*~~

### Interview 2

Several patients admitted difficulty with answering questions about mood within the chronic disease review during the interviews. They did not feel it was the appropriate place to discuss mood and that the chronic disease review took over the consultation. Some mentioned that they would like to be asked at a separate appointment just to cover mood, although also understood the difficulties in achieving this.

Formatted: Font: +Body CS (Arial), 11 pt

Formatted: Font: (Default) +Body CS (Arial), 11 pt, Italic

Formatted: Font: +Body CS (Arial)

Formatted: Font: (Default) +Body CS (Arial), 11 pt

Formatted: Font: +Body CS (Arial)

Formatted: Font: (Default) +Body CS (Arial), 11 pt

Formatted: Font: (Default) +Body CS (Arial), 11 pt, Italic

Formatted: Font: (Default) +Body CS (Arial), 11 pt

Formatted: Font: (Default) +Body CS (Arial), 11 pt, Italic

Formatted: Font: (Default) +Body CS (Arial), 11 pt, Italic

Formatted: Font: +Body CS (Arial)

Formatted: Font: (Default) +Body CS (Arial), 11 pt

Formatted: Font: +Body CS (Arial)

Formatted: Font: +Body CS (Arial), 11 pt



*“Just the fact that it’s like a, a review appointment and that I’m under time pressure so it’s not, I feel like if I am to be asked about like depression and something like that, there has to be a separate one (I: right) or like something depression, or like mood, sort of like mental illness or like anxiety or whatever, like related, an appointment related specifically to that or like a clinic specifically related to that.” Interview 21*

Patients were mostly unaware of the increased prevalence of depression in chronic illness, although felt they understood why it might occur. They suggested that introducing the case-finding questions following an explanation that depression was more common in chronic illness might facilitate disclosure; this rarely happened in practice.

Researcher: *So when the nurse asks you about your mood... just like I’m trying to imagine your perspective, why do you think that she’s asking these questions usually when you get asked?*

Patient: *I don’t know really, I didn’t know whether it was because of my history [of depression] or... I didn’t realise that people with heart problems and diabetes get depressed. I suppose if you’re not well or you’ve got on going things with you, I suppose it can depress you.” Interview 44*

### *Practice priorities and organisation*

#### *Competing practice priorities and inconsistent lines of communication around the management of potential cases of depression*

Practices varied in how they prioritised and organised case-finding for depression. Some practices devoted a lot of time and energy whilst others considered that some elements of QOF, such as the depression indicators, required too much effort for too little gain.

Field notes, Practice B: This leads to a debate over the decision between QOF payments and the work put in to achieve those payments. GPs are saying they should *“choose their battles.”*

Formatted: Font: +Body CS (Arial), 11 pt

Formatted: Font: +Body CS (Arial), 11 pt

Formatted: Font: (Default) +Body CS (Arial), 11 pt, Italic

Formatted: Font: +Body CS (Arial)

Formatted: Font: (Default) +Body CS (Arial), 11 pt

Formatted: Font: (Default) +Body CS (Arial), 11 pt, Italic

Formatted: Font: (Default) +Body CS (Arial), 11 pt

Formatted: Font: +Body CS (Arial)

Formatted: Font: +Body CS (Arial), 11 pt

Formatted: Font: +Body CS (Arial), 11 pt

Formatted: Font: (Default) +Body CS (Arial), 11 pt, Italic

Formatted: Font: +Body CS (Arial)

One practice did not concentrate on QOF at all and offered a different style of practice to their patients, with patients being seen as and when they wanted and most staff being unaware of the QOF domains and items needed, or where to find them on the computer system. Despite this, the nursing staff still used the QOF template to conduct the chronic disease reviews.

"I ask how many patients haven't been screened for depression in the last 15months.

No one knows how to find this out (including the Practice Manager and the IT guy)."

Field notes Practice J

Five out of 63 patients screened positive; practices subsequently acted on one of these.

Formatted: Font: +Body CS (Arial), 11 pt

Two patients who screened negative subsequently consulted to seek help for mood problems. Our follow up highlighted inconsistent systems and lines of communication within practices for dealing with screen-positive patients. Although GPs were aware that nursing staff undertook case finding, many did not know how a positive screen would be communicated to them. Nurses assumed that GPs reviewed the case-finding outcome when seeing patients following reviews but this was seldom the case. For example, one patient who screened positive was asked to return a PHQ9 which indicated moderate depression symptoms. This was filed without notification to a GP and only picked up on our clinical record review.

Formatted: Font: +Body CS (Arial), 11 pt

Field notes, Practice J: I ask how many patients haven't been screened for depression in the last 15months. No one knows how to find this out (including the Practice Manager and the IT guy).

Practices in areas with less deprivation seemed more likely to have a specified system for following up positive case-finding results.

"[The nurse] said if they answered they were depressed she'd do the PHQ9 with them and make them an appointment to see the Dr but she felt the Dr wouldn't do anything for them and doing the PHQ9 makes her run late so she's conflicted

about how useful it is to screen if you feel no one cares about the result.” Field notes Practice A

“[The doctor] said she didn’t really look at the mental health stuff. I said “Is there like a system in place or does a score of two trigger anything, or?” and she said “no, maybe we need to look at that.” But she left it there.” Field notes Practice F

## Discussion

Case-finding for depression did not naturally fit within primary care consultations. It appeared to augment discordance between professionals and patients. Professionals struggled to align case-finding with a person-centred approach and were wary of the risk of patients’ emotional issues derailing routine reviews. Professionals believed it was good to ask about mental health but disliked the structure of the PHQ-2 and feeling forced to add it to consultations. They subsequently responded by going ‘off script’ or discounting cues. Patients sometimes did not understand why the case-finding questions were being asked, or did not see themselves as the type of people prone to depression. This led to defensiveness or even defiance in their responses, especially if not anticipated as part of their review. Practice responses to case finding outcomes were haphazard, which may have reflected professional ambivalence towards depression case-finding and the available treatment options for those identified as having depression.

Case-finding for depression exemplifies what happens when attempts are made to fit apparently straightforward but deceptively complex interventions into primary care consultations and systems. Previously, only anecdotal evidence suggested that implementing case-finding was more difficult than intended [34]. This study provides clear evidence to the barriers faced by professionals and patients in implementing depression case-finding in practice, as well as observational data of what actually happens in practice that both parties may not be aware of. Implementing depression case-finding is different to other QOF targets as the topic itself is subject to significant stigma from both parties.

Formatted: Font: (Default) +Body CS (Arial), Bold

Formatted: Font: +Body CS (Arial)

Formatted: Font: +Body CS (Arial), 11 pt

1  
2  
3  
4  
5  
6  
7 This study provides the strongest evidence yet that the principle of interrupting the flow of  
8 clinical conversation to ask out-of-context questions about sensitive issues has many  
9 significant barriers in clinical consultations. <sup>4</sup>Much has been written about how QOF checklist

Formatted: Font: +Body CS (Arial), 11 pt

11 approaches have disrupted consultation flows and led to the patient agenda being unheard

13 ~~[31-34]~~[35-38]. This is part of a wider phenomenon. For example, Rousseau *et al*

16 demonstrated how a set of computerised prompts conflicted with established consultation

17 processes ~~[35]~~[39]. Adding the case-finding questions to these processes is inappropriate

19 when the scripts and protocols have already created discordance between agendas. <sup>5</sup>Such

Formatted: Font: +Body CS (Arial), 11 pt

22 experience highlights the need for systematic development and evaluation of such

23 interventions to ensure acceptability and feasibility before wider roll-out ~~[36]. Despite their~~

24 ~~apparent simplicity, our study has shown that depression case~~ [40]. ~~Despite their~~

26 ~~apparent simplicity, our study has shown that depression case~~ finding questions were not

Formatted: Font: +Body CS (Arial), 11 pt

28 implemented consistently within consultations and practice routines.

30 Our findings also help explain the lack of benefit of case finding when it is implemented

Formatted: Font: +Body CS (Arial), 11 pt

32 outside of collaborative care models [14]. We identified mixed attitudes towards case

34 ~~finding amongst both professionals and patients, coupled with the absence of agreed~~

Formatted: Font: +Body CS (Arial), 11 pt

36 pathways for patient follow-up and management. Collaborative care, with explicit monitoring

37 and structured management of both physical and mental health problems could help

39 alleviate some of the barriers identified in this study.

Formatted: Font: +Body CS (Arial), 11 pt

41 Study limitations mainly related to the nature of our observations, and sampled practices.

43 We were aware of the intrusive nature of observation and the likelihood that people behaved

45 differently when under observation. For example, professionals may have made more of an

47 effort to ask the PHQ2 questions sensitively, or ask them at all. When possible, observation

49 began following a period of familiarisation to allow the healthcare professional to grow used

51 to the researcher's presence. A week may also be insufficient to fully understand all practice

53 processes and relationships; however, similar approaches have produced substantial

54 insights into healthcare organisational behaviour elsewhere ~~[37]~~[41]. Even allowing for

Formatted: Font: +Body CS (Arial), 11 pt

1  
2  
3  
4  
5  
6  
7 these limitations, it is striking how often professionals did deviate from recommended  
8 practice. Professionals and patients are often used to the presence of a third party during  
9 consultations for training purposes, although some of the nurses observed did comment on  
10 feeling under pressure to demonstrate that they were following procedures correctly.

11  
12  
13  
14 The generalizability of our findings may be limited given that this study took place within one  
15 geographical area. However, Leeds is typical of UK cities in terms of social deprivation  
16 indices, demographics, characteristics of primary care services and distribution of common  
17 diseases such as CHD and diabetes [38]. ~~Furthermore, we sampled a relatively diverse~~  
18 ~~range of practices.[42]. Furthermore, we sampled a relatively diverse range of practices~~  
19 ~~and found that practice characteristics, such as deprivation and QOF achievement, affected~~  
20 ~~how case-finding was approached.~~ Opportunistic case findings were under-represented in  
21 our sample of 63 consultations but we did not find any systematic differences from chronic  
22 disease review case findings in our analysis.

23  
24  
25  
26 We identified a range of problems with incentivised screening for depression. Our  
27 accompanying interrupted time series analysis indicates that incentivised case-finding did  
28 change clinical behaviour, increasing new depression-related diagnoses and, compared with  
29 untargeted patients with chronic illness, perpetuated increasing rates of antidepressant  
30 prescribing [26][29]. It is difficult to predict with any confidence whether greater changes  
31 would have occurred if case-finding had been applied with greater fidelity. However, our  
32 findings have broader implications for efforts to improve detection of depression in people  
33 with chronic illness.

34  
35  
36  
37 Specifically, all of patients, professionals and healthcare systems need to be prepared in  
38 advance of case-finding. Firstly, for patients, experience with the diagnostic disclosure of  
39 illnesses such as dementia and cancer suggests that acceptance is facilitated by a series of  
40 negotiated steps rather than a 'one-off' process [39-40][43 44]. For example, patients in our  
41 study indicated they would have been more receptive to case-finding had they received  
42 information beforehand about the higher prevalence of depression in chronic physical illness.

Formatted: Font: +Body CS (Arial), 11 pt

1  
2  
3  
4  
5  
6  
7 It is also possible that the act of case-finding does form an initial step in helping patients  
8 consider and come to terms with a diagnosis of depression, given that we found screen  
9 negative patients subsequently consulted with mood problems. Secondly, professional  
10 attitudes towards and skills required in the detection of depression need to be examined.  
11 Some voiced unease about whether they were incorporating the questions correctly within  
12 consultations or uncertainty about how to handle potential new diagnoses, particularly  
13 nursing staff. Thirdly, resources and care pathways need to be optimised to accommodate  
14 detection and follow up. ~~Those who screen positive~~Patients identified through case-  
15 ~~finding~~ are more likely to have mild-moderate rather than severe depression and less likely  
16 to benefit from antidepressant treatment [41-42][45-46]. Resources are needed to manage  
17 those identified through case-finding recommended by clinical guidelines. Health  
18 professionals were understandably reluctant to open up a “can of worms” during tightly  
19 restricted chronic illness reviews; the exploration of sensitive issues requires greater  
20 flexibility in consultation time. We also found instances where screen-positives were not  
21 acted upon given the absence of explicitly agreed pathways within practices.

22  
23  
24  
25  
26  
27  
28  
29  
30  
31  
32  
33  
34 There are more general lessons beyond depression detection. Mood disorders are not the  
35 only sensitive issue raised during chronic illness reviews. Our findings should prompt a  
36 reappraisal of how such reviews are designed and implemented for other emotionally-laden  
37 problems integral to chronic illness care, such as weight management, sexual dysfunction  
38 and alcohol misuse [43]. ~~Health professionals may welcome structured protocols to~~  
39 ~~help ensure coverage of key issues; there is evidence that prompting interventions~~  
40 ~~have a small to modest effect on practice and patient outcomes [44]. However, such~~  
41 ~~approaches have been less successful in addressing relatively complex clinical~~  
42 ~~behaviours, especially for chronic illness management [45]. The subsequent~~  
43 ~~challenge for quality improvement programmes and research is to further explore~~  
44 ~~and evaluate how to develop interventions which can be embedded within primary~~

care systems and consultations to improve population outcomes whilst preserving patient-centred care.[47]. Health professionals may welcome structured protocols to help ensure coverage of key issues; there is evidence that prompting interventions have a small to modest effect on practice and patient outcomes [48]. However, such approaches have been less successful in addressing relatively complex clinical behaviours, especially for chronic illness management [49]. The subsequent challenge for quality improvement programmes and research is to further explore and evaluate how to develop interventions which can be embedded within primary care systems and consultations to improve population outcomes whilst preserving patient-centred care. The National Institute for Health and Care Excellence guidance on implementation recommends direct observation of practice as one way to identify potential barriers to changing practice [50] and although we have demonstrated the value of direct observation in evaluating new policy initiatives compared to (say) interview studies alone, it is not routinely undertaken when introducing new QOF indicators[11].

Incentivised case-finding exacerbated tensions between perceived patient-centredness and the time-limited routine of the consultation. Both professionals and patients reacted to the imposition of case-finding by adapting, or even subverting, the process recommended by national guidance. Despite their apparent simplicity, the case-finding questions are not consultation-friendly, and acceptable alternative ways to raise mood disorders merit further exploration. Practice, as well as guidance on how to introduce the questions so patients don't feel depression is something that happens to 'other people' as our patient's awareness theme suggests. If case-finding is to be recommended for other patient groups, practice teams need clearer guidance on the pathway for people with likely depression which can be accommodated within available systems and resources.

#### What is already known on this topic

- Case-finding for depression was incentivised in UK primary care to increase

Formatted: Font: +Body CS (Arial), 11 pt

Formatted: Font: (Default) +Body CS (Arial), Bold

Formatted: Font: +Body CS (Arial)

Formatted: Font: (Default) +Body CS (Arial), 11 pt

depression diagnosis and management.

- Evidence that case-finding has improved depression outcomes is lacking and health care professionals have expressed dissatisfaction with its implementation.

Formatted: Font: (Default) +Body CS (Arial), 11 pt

**What this study adds**

Formatted: Font: (Default) +Body CS (Arial), Bold

Formatted: Font: +Body CS (Arial)

- Patients and health care professionals subverted the standardised process of depression case-finding to suit their consultation style and needs.

Formatted: Font: (Default) +Body CS (Arial), 11 pt

Formatted: Font: (Default) +Body CS (Arial)

- Practices need clear guidance on how to include mental health discussions within consultations and pathways for those identified as through case finding. Case-finding needs to be aligned with structured care processes and how healthcare professionals and patients think about mood problems in chronic physical disease.

Formatted: Font: (Default) +Body CS (Arial)

Formatted: Font: +Body CS (Arial), 11 pt

**Ethics Approval**

Formatted: Font: (Default) +Body CS (Arial), Bold

Formatted: Font: +Body CS (Arial)

This study was approved by the South West - Exeter Research Ethics Committee (reference 11/SW/0335). The participants gave informed consent before taking part.

Formatted: Font: (Default) +Body CS (Arial), 11 pt

Formatted: Font: +Body CS (Arial)

**Funding**

Formatted: Font: (Default) +Body CS (Arial), Bold

Formatted: Font: +Body CS (Arial)

This paper summarises independent research funded by the National Institute for Health Research (NIHR) under its Research for Patient Benefit (RfPB) Programme (Grant Reference Number PB-PG-0110-21046). The views expressed are those of the authors and not necessarily those of the NHS, the NIHR or the Department of Health. Study sponsors, the University of Leeds, and NIHR RfPB had no role in study design, in the collection, analysis and interpretation of data, in the writing of the report, and in the decision to submit the article for publication. All authors had full access to all of the data in the study and can take responsibility for the integrity of the data and the accuracy of the data analysis.

Formatted: Font: +Body CS (Arial), 11 pt

**Transparency Declaration**

Formatted: Font: (Default) +Body CS (Arial), Bold

Formatted: Font: +Body CS (Arial), 11 pt



1  
2  
3  
4  
5  
6 Dr Sarah L Alderson, the lead author (the manuscript's guarantor), affirms that the  
7  
8 manuscript is an honest, accurate, and transparent account of the study being reported; that  
9  
10 no important aspects of the study have been omitted; and that any discrepancies from the  
11  
12 study as planned have been explained.

Formatted: Font: (Default) +Body CS (Arial)

### 13 14 **Data sharing statement**

15  
16 Data sharing: no additional data available.

Formatted: Font: (Default) +Body CS (Arial),  
Bold

Formatted: Font: +Body CS (Arial)

### 17 18 **Contributorship Statement**

19  
20 RF and AH conceived the project. RF was principal investigator. SA and KM designed the  
21  
22 study. SA and AR were responsible for running the project. AR was responsible for data  
23  
24 collection. All authors interpreted the data and findings. SA wrote the first draft of the  
25  
26 manuscript. RF commented on the first draft and all authors commented on further revisions.  
27  
28 SA is guarantor of the paper.

Formatted: Font: (Default) +Body CS (Arial),  
Bold

Formatted: Font: +Body CS (Arial)

Formatted: Font: +Body CS (Arial), 11 pt

### 29 30 **Competing interests**

31  
32 All authors received funding from National Institute of Health Research to undertake this  
33  
34 study.

### 35 36 **References**

- 37  
38  
39 1. Goldney RD, Phillips PJ, Fisher LJ, [Wilson-DH et al.](#) Diabetes, Depression, and Quality of Life.  
40 Diabetes Care 2004;**27**(5):1066-70 doi: 10.2337/diacare.27.5.1066[published Online First:  
41 Epub Date]].
- 42 2. Rudisch B, Nemeroff CB. Epidemiology of comorbid coronary artery disease and depression.  
43 Biological Psychiatry 2003;**54**(3):227-40
- 44 3. Carney RM, Freedland KE, Miller GE, [Jaffe-AS et al.](#) Depression as a risk factor for cardiac mortality  
45 and morbidity: A review of potential mechanisms. Journal of Psychosomatic Research  
46 2002;**53**(4):897-902
- 47 4. Anderson RJ, Freedland KE, Clouse RE, [Lustman-PJ et al.](#) The Prevalence of Comorbid Depression  
48 in Adults With Diabetes: A meta-analysis. Diabetes Care 2001;**24**(6):1069-78 doi:  
49 10.2337/diacare.24.6.1069[published Online First: Epub Date]].
- 50 5. Simon GE, VonKorff M. Recognition, management, and outcomes of depression in primary care.  
51 1995(2):99-105

- 1  
2  
3  
4  
5  
6  
7  
8  
9  
10  
11  
12  
13  
14  
15  
16  
17  
18  
19  
20  
21  
22  
23  
24  
25  
26  
27  
28  
29  
30  
31  
32  
33  
34  
35  
36  
37  
38  
39  
40  
41  
42  
43  
44  
45  
46  
47  
48  
49  
50  
51  
52  
53  
54  
55  
56  
57  
58  
59  
60
6. Barth J, Schumacher M, Herrmann-Lingen C. Depression as a Risk Factor for Mortality in Patients With Coronary Heart Disease: A Meta-analysis. *Psychosom. Med.* 2004;**66**(6):802-13 doi: 10.1097/01.psy.0000146332.53619.b2[published Online First: Epub Date]].
  7. Katon W, Ciechanowski P. Impact of major depression on chronic medical illness. *Journal of Psychosomatic Research* 2002;**53**(4):859-63
  8. National Institute of Clinical Excellence. Depression in adults with a chronic physical health problem: treatment and management. NICE. : NICE, 2009.
  9. New Zealand Guidelines Group. Identification of Common Mental Disorders and Management of Depression in Primary Care. An Evidence-based Best Practice Guideline. Wellington, 2008.
  10. US Preventative Services Task Force. Screening for Depression in Adults: U.S. Preventive Services Task Force Recommendation Statement. *Annals of Internal Medicine* 2009;**151**(11):784-92 doi: 10.1059/0003-4819-151-11-200912010-00006[published Online First: Epub Date]].
  11. University of Birmingham and University of York Health Economics Consortium. NM49 indicator development feedback report 2012.
  12. BMJ Best Practice. Screening: Patient Health Questionnaire-2 (PHQ-2). BMJ Best Practice 2010. <http://bestpractice.bmj.com/best-practice/monograph/55/prevention.html>.
  13. Health and Social Care Information Centre. Quality Outcomes Framework 2012/13 results. Secondary Quality Outcomes Framework 2012/13 results 2013. <http://qof.hscic.gov.uk/index.asp>.
  14. Gilbody S, Sheldon T, House A. Screening and case-finding instruments for depression: a meta-analysis. *Canadian Medical Association Journal* 2008;**178**(8):997-1003 doi: 10.1503/cmaj.070281[published Online First: Epub Date]].
  15. Dowrick C, Buchan I. Twelve month outcome of depression in general practice: does detection or disclosure make a difference? *BMJ* 1995;**311**(7015):1274-76
  16. Gilbody SM, House A, Sheldon T. Screening and case finding instruments for depression [Systematic Review]. *Cochrane Database of Systematic Reviews* 2009;**3**:3
  17. Pignone MP, Gaynes BN, Rushton JL, et al. Screening for Depression in Adults: A Summary of the Evidence for the U.S. Preventive Services Task Force. *Annals of Internal Medicine* 2002;**136**(10):765-76 doi: 10.7326/0003-4819-136-10-200205210-00013[published Online First: Epub Date]].
  18. ~~Serumaga B, Ross-Degnan D, Avery A, et al. Effect of pay for performance on the management and outcomes of hypertension in the United Kingdom: interrupted time series study. *BMJ* 2011;**342**:d108-Gilbody S, Sheldon T, Wessely S. Should we screen for depression? *BMJ* 2006;**332**(7548):1027-30 doi: 10.1136/bmj.332.7548.1027[published Online First: Epub Date]].~~
  19. National Screening Committee. Programme Appraisal Criteria. Secondary Programme Appraisal Criteria 2013. [www.screening.nhs.uk/criteria](http://www.screening.nhs.uk/criteria).
  20. ~~Serumaga B, Ross-Degnan D, Avery A, et al. Effect of pay for performance on the management and outcomes of hypertension in the United Kingdom: interrupted time series study. *BMJ* 2011;**342**:d108~~
  21. Campbell SM, Reeves D, Kontopantelis E, ~~Sibbald B, Roland Met al.~~ Effects of Pay for Performance on the Quality of Primary Care in England. *N Engl J Med* 2009;**361**:368-78
  22. Scott A, Sivey P, Ait Ouakrim D, et al. The effect of financial incentives on the quality of health care provided by primary care physicians. *Cochrane Database Syst Rev* 2011(9):CD008451

- 1  
2  
3  
4  
5  
6  
7 [2123](#). Checkland K, Harrison S, McDonald R, ~~Grant S, Campbell SM, Guthrie B~~ et al. Biomedicine, holism and general medical practice: responses to the 2004 General Practitioner contract. *Sociology of Health and Illness* 2008;**30**:788-803
- 8  
9  
10 [2224](#). McDonald R, Harrison S, Checkland K, ~~Campbell S, Roland Met~~ et al. Impact of financial incentives on clinical autonomy and internal motivation in primary care: ethnographic study. *BMJ* 2007;**334**(7608):1333-34
- 11  
12  
13 [2325](#). Maisey S, Steel N, Marsh R, ~~Gillam S, Fleetcroft R, Howe A~~ et al. Effects of payment for performance in primary care: qualitative interview study. *Journal of Health Services Research & Policy* 2008;**13**(3):133-39 doi: 10.1258/jhsrp.2008.007118[published Online First: Epub Date] |.
- 14  
15  
16  
17  
18 [2426](#). Mitchell C, Dwyer R, Hagan T, ~~Mathers Net~~ et al. Impact of the QOF and the NICE guideline in the diagnosis and management of depression: a qualitative study. *Br. J. Gen. Pract.* 2011;**61**(586):e279-e89 doi: 10.3399/bjgp11X572472[published Online First: Epub Date] |.
- 19  
20  
21  
22 [2527](#). Coventry PA, Hays R, Dickens C, et al. Talking about depression: a qualitative study of barriers to managing depression in people with long term conditions in primary care. *BMC Fam Pract* 2011;**12**:10 doi: 10.1186/1471-2296-12-10[published Online First: Epub Date] |.
- 23  
24  
25 [2628](#). Dowrick C, Leydon GM, McBride A, et al. Patients' and doctors' views on depression severity questionnaires incentivised in UK quality and outcomes framework: qualitative study. Br. Med. J. 2009;338:6 doi: b663
- 26  
27 [10.1136/bmj.b663\[published Online First: Epub Date\] |.](#)
- 28  
29 [29](#). McLintock K, Russell A, West R, et al. Effect of financial incentives on screening for depression in patients with chronic disease in the United Kingdom: an interrupted time series study. Manuscript in preparation 2013
- 30  
31  
32 [2730](#). Practitioners RCoG. Supporting Carers: An action guide for general practitioners and their teams.: Royal College of General Practitioners, 2011.
- 33  
34  
35 [2831](#). Burden AD, Boon MH, Leman J, ~~Wilson H, Richmond R, Ormerod A~~ et al. Diagnosis and management of psoriasis and psoriatic arthritis in adults: summary of SIGN guidance. *BMJ* 2010;**341** doi: 10.1136/bmj.c5623[published Online First: Epub Date] |.
- 36  
37  
38 [2932](#). Collier F, Smith RC, Morton CA. Diagnosis and management of hidradenitis suppurativa. *BMJ* 2013;**346** doi: 10.1136/bmj.f2121[published Online First: Epub Date] |.
- 39  
40  
41 [3033](#). Emerson RM, Fretz RI, Shaw LL. *Writing ethnographic fieldnotes*. 2nd ed: University of Chicago Press, 2011.
- 42  
43 ~~[3134](#). Anekwe L. QOF depression indicators face axe. *Pulse* 2011(June 2011)~~
- 44  
45 [35](#). Chew-Graham CA, Hunter C, Langer S, et al. How QOF is shaping primary care review consultations: a longitudinal qualitative study. *BMC Fam Pract* 2013;**14**(1):103
- 46  
47 ~~[3236](#). Campbell SM, McDonald R, Lester H. The experience of pay for performance in English family practice: a qualitative study. *Annals of Family Medicine* 2008;**6**(3):228-34~~
- 48  
49 [3337](#). Hannon KL, Lester HE, Campbell SM. Patients' views of pay for performance in primary care: a qualitative study. *Br. J. Gen. Pract.*; **62**(598):e322-e28 doi: 10.3399/bjgp12X641438[published Online First: Epub Date] |.
- 50  
51  
52 [3438](#). Lester H, Matharu T, Mohammed MA, ~~Lester D, Foskett-Tharby Ret~~ et al. Implementation of pay for performance in primary care: a qualitative study 8 years after introduction. *Br. J. Gen.*
- 53  
54  
55  
56  
57  
58  
59  
60

- Pract. 2013;**63**(611):e408-e15 doi: 10.3399/bjgp13X668203[published Online First: Epub Date]].
- 3539.** Rousseau N, McColl E, Newton J, ~~Grimshaw J, Eccles Met al.~~ Practice based, longitudinal, qualitative interview study of computerised evidence based guidelines in primary care. *BMJ* 2003;**326**(7384):314 doi: 10.1136/bmj.326.7384.314[published Online First: Epub Date]].
- 3640.** Craig P, Dieppe P, Macintyre S, ~~Michie S, Nazareth I, Petticrew Met al.~~ Developing and evaluating complex interventions: the new Medical Research Council guidance. *BMJ* 2008;**337** doi: 10.1136/bmj.a1655[published Online First: Epub Date]].
- 3741.** Dixon-Woods M, Leslie M, Bion J, ~~Farrant-Cet al.~~ What Counts? An Ethnographic Study of Infection Data Reported to a Patient Safety Program. *Milbank Quarterly* 2012;**90**(3):548-91 doi: 10.1111/j.1468-0009.2012.00674.x[published Online First: Epub Date]].
- 3842.** Public Health England. National General Practice Profiles - Leeds PCT. Secondary National General Practice Profiles - Leeds PCT 2013.  
<http://www.apho.org.uk/PracProf/Profile.aspx#mod,2,pyr,2012,pat,2,par,E16000074,are,-,sid1,2000002,ind1,243-4,sid2,2000005,ind2,->
- 3943.** Fallowfield L, Jenkins V. Effective communication skills are the key to good cancer care. *European journal of cancer (Oxford, England : 1990)* 1999;**35**(11):1592-7
- 4044.** Lecouturier J, Bamford C, Hughes J, et al. Appropriate disclosure of a diagnosis of dementia: identifying the key behaviours of 'best practice'. *BMC Health Services Research* 2008;**8**(1):1-10 doi: 10.1186/1472-6963-8-95[published Online First: Epub Date]].
- 4145.** Coyne JC, Schwenk TL, Fechner-Bates S. Nondetection of depression by primary care physicians reconsidered. *General Hospital Psychiatry* 1995;**17**(1):3-12 doi: [http://dx.doi.org/10.1016/0163-8343\(94\)00056-J](http://dx.doi.org/10.1016/0163-8343(94)00056-J)[published Online First: Epub Date]].
- 4246.** Arroll B, Goodyear-Smith F, Crengle S, et al. Validation of PHQ-2 and PHQ-9 to screen for major depression in the primary care population. *Ann Fam Med* 2010;**8**(4):348-53 doi: 10.1370/afm.1139[published Online First: Epub Date]].
- 4347.** Crosson JC, Heisler M, Subramanian U, et al. Physicians' Perceptions of Barriers to Cardiovascular Disease Risk Factor Control among Patients with Diabetes: Results from the Translating Research into Action for Diabetes (TRIAD) Study. *The Journal of the American Board of Family Medicine* 2010;**23**(2):171-78 doi: 10.3122/jabfm.2010.02.090125[published Online First: Epub Date]].
- 4448.** Shojania Kaveh G, Jennings A, Mayhew A, ~~Ramsay Craig R, Eccles Martin P, Grimshaw Jet al.~~ The effects of on-screen, point of care computer reminders on processes and outcomes of care. *Cochrane Database of Systematic Reviews* 2009; (3).  
<http://onlinelibrary.wiley.com/doi/10.1002/14651858.CD001096.pub2/abstract>.
- 4549.** Grimshaw JM, Eccles MP, Lavis JN, ~~Hill SJ, Squires JE, et al.~~ Knowledge translation of research findings. *Implementation Science* 2012;**7**(50):1-29
- 50.** [National Institute for Health and Care Excellence. Into practice guide: Using NICE guidance and quality standards to improve practice, 2013.](#)

**Table 1 – Observed practice characteristics**

| Surgery    | QOF score* | List Size* | Deprivation Score* | Patients Recruited |
|------------|------------|------------|--------------------|--------------------|
| Practice A | Low        | Low        | Low                | 3                  |
| Practice B | Low        | High       | High               | 13                 |
| Practice C | Low        | High       | Low                | 5                  |
| Practice D | High       | High       | Low                | 6                  |
| Practice E | High       | High       | High               | 6                  |
| Practice F | High       | Low        | High               | 5                  |
| Practice G | Low        | High       | Low                | 5                  |
| Practice H | Low        | Low        | Low                | 5                  |
| Practice I | High       | High       | Low                | 4                  |
| Practice J | Low        | Low        | High               | 5                  |
| Practice K | Low        | Low        | High               | 4                  |
| Practice L | High       | Low        | Low                | 2                  |

\* Compared to Primary Care Trust median

**Formatted:** Font: (Default) +Body CS (Arial), Bold

**Formatted:** Font: +Body CS (Arial)

**Formatted:** Font: +Body CS (Arial), 11 pt

**Table 2 - Patient demographics in observed consultations**

|                                         | <b>No. of patients</b> | <b>% of patients</b> |
|-----------------------------------------|------------------------|----------------------|
| <b>Gender</b>                           |                        |                      |
| Female                                  | 21                     | 33%                  |
| Male                                    | 42                     | 67%                  |
| <b>Age group</b>                        |                        |                      |
| 18-30                                   | 7                      | 11%                  |
| 31-50                                   | 5                      | 8%                   |
| 51-64                                   | 18                     | 29%                  |
| 65-79                                   | 28                     | 44%                  |
| 80+                                     | 5                      | 8%                   |
| <b>Chronic Illness</b>                  |                        |                      |
| CHD                                     | 13                     | 21%                  |
| DM                                      | 46                     | 73%                  |
| CHD & DM                                | 4                      | 6%                   |
| <b>Ethnicity</b>                        |                        |                      |
| White British                           | 49                     | 78%                  |
| Mixed British                           | 1                      | 2%                   |
| White Irish                             | 2                      | 3%                   |
| Chinese                                 | 1                      | 2%                   |
| Black Caribbean                         | 5                      | 8%                   |
| Pakistani                               | 3                      | 5%                   |
| British Asian                           | 1                      | 2%                   |
| Indian                                  | 1                      | 2%                   |
| <b>Previous diagnosis of depression</b> |                        |                      |
| Yes                                     | 9                      | 14%                  |
| No                                      | 54                     | 86%                  |

Formatted: Font: (Default) +Body CS (Arial), Bold

Formatted: Font: +Body CS (Arial)

Formatted: Font: +Body CS (Arial), 11 pt

Figure 1. Flow chart of idealised depression case-finding process and barriers identified.

1  
2  
3  
4  
5  
6  
7  
8  
9  
10  
11  
12  
13  
14  
15  
16  
17  
18  
19  
20  
21  
22  
23  
24  
25  
26  
27  
28  
29  
30  
31  
32  
33  
34  
35  
36  
37  
38  
39  
40  
41  
42  
43  
44  
45  
46  
47  
48  
49  
50  
51  
52  
53  
54  
55  
56  
57  
58  
59  
60

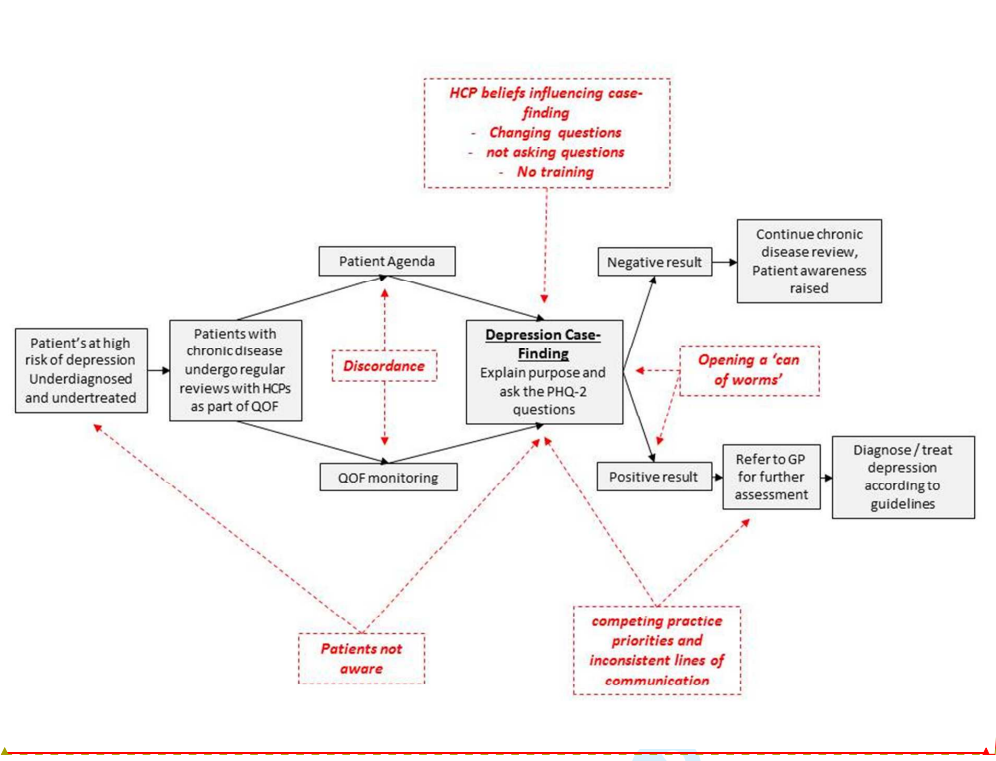

Formatted: Font: (Default) +Body CS (Arial), 11 pt

Formatted: Font: +Body CS (Arial), 11 pt

Review only

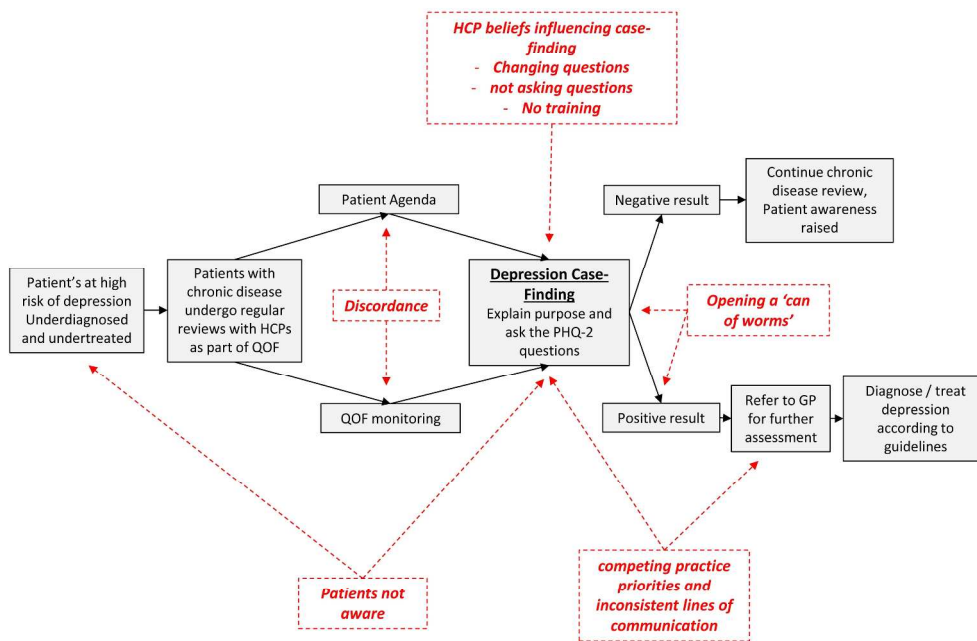

Figure 1. Flow chart of idealised depression case-finding process and barriers identified. 254x190mm (300 x 300 DPI)



# BMJ Open

## Incentivised case finding for depression in patients with chronic heart disease and diabetes in primary care: an ethnographic study

|                                 |                                                                                                                                                                                                                                                                                                                                                                                                                               |
|---------------------------------|-------------------------------------------------------------------------------------------------------------------------------------------------------------------------------------------------------------------------------------------------------------------------------------------------------------------------------------------------------------------------------------------------------------------------------|
| Journal:                        | <i>BMJ Open</i>                                                                                                                                                                                                                                                                                                                                                                                                               |
| Manuscript ID:                  | bmjopen-2014-005146.R2                                                                                                                                                                                                                                                                                                                                                                                                        |
| Article Type:                   | Research                                                                                                                                                                                                                                                                                                                                                                                                                      |
| Date Submitted by the Author:   | 22-Jul-2014                                                                                                                                                                                                                                                                                                                                                                                                                   |
| Complete List of Authors:       | Alderson, Sarah; University of Leeds, Leeds Institute of Health Sciences<br>Russell, Amy; University of Leeds, Leeds Institute of Health Sciences<br>McLintock, Kate; University of Leeds, Leeds Institute of Health Sciences<br>Potrata, Barbara; University of Leeds, Leeds Institute of Health Sciences<br>House, AO; Academic Unit of Psychiatry,<br>Foy, Robbie; University of Leeds, Leeds Institute of Health Sciences |
| <b>Primary Subject Heading</b>: | General practice / Family practice                                                                                                                                                                                                                                                                                                                                                                                            |
| Secondary Subject Heading:      | Patient-centred medicine, Mental health, Health policy, Cardiovascular medicine, Diabetes and endocrinology                                                                                                                                                                                                                                                                                                                   |
| Keywords:                       | PRIMARY CARE, Coronary heart disease < CARDIOLOGY, General diabetes < DIABETES & ENDOCRINOLOGY, MENTAL HEALTH, Depression & mood disorders < PSYCHIATRY, QUALITATIVE RESEARCH                                                                                                                                                                                                                                                 |
|                                 |                                                                                                                                                                                                                                                                                                                                                                                                                               |

SCHOLARONE™  
Manuscripts

Only

1  
2  
3 **Incentivised case finding for depression in patients with chronic heart disease and**  
4 **diabetes in primary care: an ethnographic study**  
5

6 Sarah L Alderson, Amy M Russell, Kate McLintock, Barbara Potrata, Allan House, Robbie  
7 Foy

8 Leeds Institute of Health Sciences, Charles Thackrah Building, University of Leeds, 101  
9 Clarendon Road, Leeds, LS2 9LJ. Sarah L Alderson  
10 Clinical Lecturer in Primary Care  
11

12  
13 Leeds Institute of Health Sciences, Charles Thackrah Building, University of Leeds, 101  
14 Clarendon Road, Leeds, LS2 9LJ. Amy M Russell  
15 Senior Research Fellow  
16

17  
18 Leeds Institute of Health Sciences, Charles Thackrah Building, University of Leeds, 101  
19 Clarendon Road, Leeds, LS2 9LJ. Kate McLintock  
20 Clinical Lecturer in Primary Care  
21

22  
23 Leeds Institute of Health Sciences, Charles Thackrah Building, University of Leeds, 101  
24 Clarendon Road, Leeds, LS2 9LJ. Barbara Potrata  
25 Research Fellow  
26

27  
28 Leeds Institute of Health Sciences, Charles Thackrah Building, University of Leeds, 101  
29 Clarendon Road, Leeds, LS2 9LJ. Allan House  
30 Professor of Liaison Psychiatry  
31

32  
33 Leeds Institute of Health Sciences, Charles Thackrah Building, University of Leeds, 101  
34 Clarendon Road, Leeds, LS2 9LJ. Robbie Foy  
35 Professor of Primary Care  
36

37  
38 The Corresponding Author has the right to grant on behalf of all authors and does grant on  
39 behalf of all authors, a worldwide licence to the Publishers and its licensees in perpetuity, in  
40 all forms, formats and media (whether known now or created in the future), to i) publish,  
41 reproduce, distribute, display and store the Contribution, ii) translate the Contribution into  
42 other languages, create adaptations, reprints, include within collections and create  
43 summaries, extracts and/or, abstracts of the Contribution, iii) create any other derivative  
44 work(s) based on the Contribution, iv) to exploit all subsidiary rights in the Contribution, v)  
45 the inclusion of electronic links from the Contribution to third party material where-ever it may  
46 be located; and, vi) licence any third party to do any or all of the above.  
47  
48  
49  
50  
51  
52  
53  
54  
55  
56  
57  
58  
59  
60

## Abstract

### *Objective*

To examine the process of case-finding for depression in people with diabetes and coronary heart disease within the context of a pay-for-performance scheme.

### *Design*

Ethnographic study drawing upon observations of practice routines and consultations, debriefing interviews with staff and patients, and review of patient records.

### *Setting*

General practices in Leeds, United Kingdom.

### *Participants*

Twelve purposively sampled practices with a total of 119 staff; 63 consultation observations; and 57 patient interviews.

### *Main outcome measure*

Audio-recorded consultations and interviews with patients and health care professionals along with observation field notes were thematically analysed. We assessed outcomes of case-finding from patient records.

### *Results*

Case-finding exacerbated the discordance between patient and professional agendas, the latter already dominated by the tightly structured and time-limited nature of chronic illness reviews. Professional beliefs and abilities affected how case-finding was undertaken; there was uncertainty about how to ask the questions, particularly amongst nursing staff.

Professionals were often wary of opening an emotional “can of worms.” Subsequently, patient responses potentially suggesting emotional problems could be prematurely shut down by professionals. Patients did not understand why they were asked questions about depression. This sometimes led to defensive or even defiant answers to case-finding.

1  
2  
3 Follow up of patients highlighted inconsistent systems and lines of communication for  
4  
5 dealing with positive results on case-finding .  
6

### 7 *Conclusions*

8  
9  
10 Case-finding does not fit naturally within consultations; both professional and patient  
11  
12 reactions somewhat subverted the process recommended by national guidance. Quality  
13  
14 improvement strategies will need to take account of our results in two ways. First, despite  
15  
16 their apparent simplicity, the case-finding questions are not consultation-friendly, and  
17  
18 acceptable alternative ways to raise the issue of depression need to be supported. Second,  
19  
20 case-finding needs to operate within structured pathways which can be accommodated  
21  
22 within available systems and resources.  
23

### 24 **Strengths and limitations of this study**

#### 25 **Strengths**

- 26 • Multi-site ethnography of broadly representative general practices
- 27 • Triangulation through use of multiple sources of data

#### 28 **Limitations**

- 29 • Potential for clinician and patient behaviour to alter as a response to being observed
- 30 • Short periods of observation in each practice limiting range of types of behaviour  
31  
32 observed
- 33 • Observations within one geographical area, thereby potentially limiting  
34  
35 generalisability

## Introduction

The detection and management of depression associated with chronic physical illness represents a major challenge for primary care. Depression is twice as common in those with chronic physical illness such as coronary heart disease (CHD) and diabetes compared to those without chronic physical illness [1-4]. Such co-morbidity can make depression hard to recognize, especially as symptoms of depression (such as fatigue) overlap with those of chronic physical illnesses [5]. Co-morbidity is also associated with poorer outcomes, including mortality [3 6 7]. One response is case-finding, defined as selective screening for depression in populations at high risk, such as those with chronic illness. This has been recommended by national guidance in the UK [8] and elsewhere. [9 10]. The Quality and Outcomes Framework (QOF), a pay-for-performance scheme in UK primary care, rewarded depression case-finding using two standard screening questions from the Patient Health Questionnaire-2 (PHQ-2) in all patients with CHD or diabetes [11]. The PHQ-2 asks, 'In the past two weeks, have you been bothered by: little interest or pleasure in doing things; and feeling down, depressed or hopeless?' [12] Routine data suggested high levels of case-finding, with a national average of 86% of eligible patients screened in 2011-12 [13].

However, there are problems with both the rationale underpinning this recommendation and the means undertaken to promote its implementation in the UK.

Firstly, there is no evidence that case-finding for depression by itself improves patient outcomes [14]. For case-finding to be effective it is important that potential cases are further assessed, diagnosed and offered appropriate clinical management within a structured clinical pathway [15-17]. There was no closely allied incentive in the QOF programme for subsequent patient care. Case-finding should also be considered against other recommended criteria for screening tests, such as acceptability and having an agreed policy about whom to treat as patients [18 19].

Secondly, evidence on the effects of financial incentives on primary care practice is, at best, mixed [20-22]. There are concerns that such incentives undermine professionals' intrinsic

1  
2  
3 motivation, patient-centeredness, and continuity of care and have led to a 'tick box' culture  
4 as health professionals work through checklists for chronic illness management [21 23-25].  
5  
6 Health professionals themselves have expressed dissatisfaction with incentivised depression  
7  
8 management, particularly the use of incentivised depression severity measurements,  
9  
10 although patients value their use within consultations. [26-28].  
11  
12

13  
14 Our accompanying interrupted time series analysis found that incentivised case finding  
15  
16 increased new depression-related diagnoses in people with diabetes and CHD and  
17  
18 perpetuated rising trends in new prescriptions of antidepressants [29]. Even though this  
19  
20 incentivised case finding ceased in 2013 due to lack of evidence of patient benefit, there are  
21  
22 continuing calls for 'something to be done' to detect and treat depression in high risk groups  
23  
24 [30-32]. However, the professional and patient experiences of incentivised case-finding,  
25  
26 how it affected clinical care, and its fit with the routines of practice life are poorly understood.  
27  
28 We investigated the process of incentivised case-finding during scheduled and opportunistic  
29  
30 reviews of patients with diabetes and CHD.  
31  
32

## 33 34 **Methods**

### 35 36 37 *Design and setting*

38  
39 Our ethnographic design combined direct observation with interviews and review of patient  
40  
41 records. We wanted to build an in-depth understanding of how patient case-finding was  
42  
43 conducted within the context of everyday practice life and routine patient care. The study  
44  
45 took place in general practices in Leeds, UK.  
46  
47

### 48 49 *Participants*

50  
51 We invited all practices in Leeds to participate. We then sought a purposive sample of  
52  
53 practices using a four-by-two sampling frame based upon whether practice QOF  
54  
55 achievement was above or below the Leeds median, further stratified by list size and  
56  
57  
58  
59  
60

1  
2  
3 deprivation profiles. Practices that consented to participate were booked for a week of  
4 observation, during which we aimed to observe at least three consultations.  
5  
6

7 Practices sent letters of invitation and information packs to patients scheduled for chronic  
8 disease reviews within the observation week. We also approached patients attending for  
9 routine consultations to enable observation of opportunistic case-finding. Practice staff  
10 identified patients due to be asked the case-finding questions and asked if they would be  
11 interested in participating when they arrived at reception for their appointment. All patients  
12 and professionals subsequently observed gave informed consent.  
13  
14  
15  
16  
17  
18

### 19 *Data collection and analysis*

20 An ethnographer (AR) used a funnelling approach to observe and describe the context of  
21 and behaviours within the practice [33], moving to detailed observation and audio-recording  
22 of consultations. Observation considered both verbal and non-verbal features including: how  
23 case-finding questions are framed and asked; events leading up to questioning; patient  
24 verbal and non-verbal reactions and responses; and overall style of the consultation. This  
25 style of observation allowed the researcher to layer the analysis of the consultations with  
26 contextual information providing a richer interpretation of the observation data. She held  
27 semi-structured debriefing interviews with patients who had been observed. The interviews  
28 aimed to explore patient views on the process and experience of the consultation in further  
29 depth. Unstructured interviews took place with the health care professionals involved in  
30 depression case-finding and notes taken on all discussions regarding depression case-  
31 finding. We reviewed patients' medical records six weeks after observation to check for any  
32 subsequent clinical events related to depression identification and management. Events  
33 included appointments where mood was discussed, telephone consultations, depression  
34 severity assessments, referrals to mental health teams or talking therapies and new  
35 prescriptions for depression medication.  
36  
37  
38  
39  
40  
41  
42  
43  
44  
45  
46  
47  
48  
49  
50  
51  
52  
53  
54  
55  
56  
57  
58  
59  
60

1  
2  
3 The perceived relative importance and organisation of QOF-related case-finding may vary  
4 throughout the year. To partly ameliorate this we observed two practices towards the end of  
5 the financial year when practices are typically working hardest to achieve QOF targets.  
6  
7

8  
9 Transcribed data (interviews, observation transcripts and observation notes) were managed  
10 using NVivo9 and coded for themes. Thematic analysis was undertaken by two researchers,  
11 independently coding for the themes and then comparing codes and themes. The analysis  
12 was further refined by using constant comparison of themes, and looking for negative cases  
13 in order to examine for similarities and differences within and between the patients'  
14 perception and observations in different centres. Finally, to improve reliability and validity of  
15 data, we triangulated findings from all three data sources.  
16  
17  
18  
19  
20  
21  
22

### 23 24 25 *Ethical review*

26  
27 The study was approved by National Research Ethics Service Committee South West –  
28 Exeter (11/SW/0335).  
29  
30  
31  
32

### 33 34 **Results**

35  
36 Twelve practices participated and a total of 63 patient consultations were observed (range 2-  
37 13 per practice; Table 1). Practice characteristics were relatively balanced, with five having  
38 QOF achievement above the median for Leeds, five above median population deprivation  
39 scores, and six above median list size. Patients were most commonly male, age 51-79  
40 years, and white British (Table 2). Most (73%) participants had diabetes and nine (14%) had  
41 a previous diagnosis of depression. Nine of the observed case findings took place  
42 'opportunistically' within routine GP appointments. The rest occurred within dedicated  
43 chronic disease clinics, usually with nurses.  
44  
45  
46  
47  
48  
49  
50  
51

52  
53 Based upon available guidance, observations and interviews, we constructed a basic  
54 normative model of the process by which case-finding was expected to improve depression  
55 detection and treatment (Figure 1). We then identified a number of ways in which  
56  
57  
58  
59  
60



1  
2  
3 professional and patient behaviours and beliefs and the working patterns of general  
4 practices subverted or affected the operation of this model. We found five barriers:  
5  
6 discordance between patient and professional agendas; professional uncertainty around  
7  
8 how to undertake the case-finding itself; reluctance to open a “can of worms”; patients being  
9  
10 unaware of depression risk or case-finding taking place; and competing practice priorities  
11  
12 and inconsistent lines of communication around the management of potential cases of  
13  
14 depression.  
15

### 16 17 18 *Discordance between patient and professional agendas*

19  
20 Case-finding often occurred within tightly structured and time-limited chronic illness reviews  
21  
22 required to document QOF processes of care, and appeared to exacerbate existing  
23  
24 discordance. This led to professionals disregarding attempts by patients to steer the  
25  
26 consultation around to their own perceived needs. Patients were often not focused on and  
27  
28 often did not understand the purpose of the review process and used the consultation as an  
29  
30 opportunity to raise other problems. To manage this, professionals often interrupted patients  
31  
32 or returned the consultation to its purpose, discounting clues that the patient had worries  
33  
34 related to the chronic disease being reviewed or other illnesses.  
35

36  
37 Patient: [talking about hypoglycaemic attacks which were a subject of significant  
38  
39 anxiety for this patient (revealed in interview after appointment)] *Only time that I went*  
40  
41 *funny, I had a tooth out and I'd had, I couldn't have any breakfast, or I didn't have any*  
42  
43 *breakfast, because I don't like to be poorly when I've had teeth out, because I used*  
44  
45 *to be when I was younger, am I talking and disturbing....*  
46

47  
48 [Fieldnote] Nurse is trying to measure blood pressure; patient looks agitated.  
49

50 Nurse: *Yes, I think you just probably need to just be quiet for a couple of minutes*  
51  
52 *while I check it, because it's even higher now! We want it to go down! Just try and*  
53  
54 *relax. OK. Observation 29*  
55

1  
2  
3 At this stage in the consultation the patient became distressed, apparently wishing to discuss  
4 further their worries about hypoglycaemia. The professional subsequently moved the  
5 conversation on to another QOF target and no follow up of concerns about hypoglycaemia  
6 was arranged. The patient later told the researcher she was extremely worried about hypos  
7 and was experiencing consistently low mood and high anxiety. The context of chronic illness  
8 reviews was restrictive – in this case an opportunity for direct, subject specific case-finding  
9 was missed because of the necessity to ask about and record other items. This represents  
10 a missed opportunity for case-finding at a point in the review when the patient might have  
11 been receptive to exploring associated mood problems.  
12

13  
14  
15  
16  
17  
18  
19  
20  
21  
22 Difficulties arose in the consultation when the patient mentioned a problem that the health  
23 professional perceived to be important but unrelated to the disease under review.

24  
25  
26 Sometimes the review had to be abandoned as the patient's agenda became too important  
27 to be ignored, or the patient too distressed to continue concentrating on the review. This  
28 more patient-centred approach appeared to occur more often in practices that had lower  
29 than average QOF achievement, suggesting that such practices traded off potential income  
30 against responsiveness to patients.  
31  
32  
33  
34  
35

### 36 *Professional uncertainty around how to undertake the case-finding itself*

37  
38  
39 Professional beliefs and abilities affected how case-finding was undertaken. In conversation  
40 professionals expressed uncertainty about how best to phrase and ask the questions,  
41 particularly nursing staff who told the researcher they sometimes felt insufficiently trained on  
42 how to manage patients with possible depression. When asked, they questioned whether  
43 they were case-finding for QOF rather than patient benefit. We noticed that those who felt  
44 that the case-finding was for the benefit of patients appeared to work in practices that were  
45 in areas of low deprivation, where as those in areas of higher deprivation felt there was a  
46 lack of time to ask the questions and deal with any responses that might indicate a problem  
47 with mood. In the context of a time-restricted consultation they felt overburdened.  
48  
49  
50  
51  
52  
53  
54  
55  
56  
57  
58  
59  
60

1  
2  
3 Field notes Practice A: [The nurse] referred to QOF as coming from “*on high*” to tell her  
4 to incorporate it [case-finding]. She felt depression screening was problematic as they  
5 had received “*no training*” in mental health or in screening and they were very  
6  
7  
8  
9 “*stretched for time in the appointment.*”  
10

11 Professionals avoided directly asking case-finding questions if they were familiar with  
12 patients but still recorded case-finding; they expressed beliefs that they could identify mood  
13 changes through existing knowledge of patients. They often adapted the questions to suit  
14 their consultation style or perceived patient needs.  
15  
16  
17  
18

19 Sometimes confusion arose when the questions were framed to ask whether the patient was  
20 coping with their illness, rather than to assess mood disorders in general. The patient  
21 answered that they were managing their condition well but did not talk about their mood.  
22 This was because the professionals believed the case-finding was to detect depression  
23 associated with chronic disease only, not depression of any cause.  
24  
25  
26  
27  
28  
29

30  
31 Nurse: *Then so do you feel ok about your diabetes, do you have any, do you worry*  
32 *about it, does it bother you at all?* Observation 27  
33  
34  
35

36 The case-finding questions were usually asked in the middle of chronic disease reviews.  
37 Generally the templates for such reviews were followed in order, with depression case-  
38 finding often occurring after discussion of alcohol consumption and smoking status. Once  
39 asked, the professional would move on to discuss diet and exercise. The case-finding  
40 questions appeared out of place in the consultation that mainly involved measuring physical  
41 factors rather than mood related problems. When asked about the case-finding, most  
42 nurses felt it was difficult to switch from asking something that could be measured (such as  
43 weight, units of alcohol consumed) to something more subjective.  
44  
45  
46  
47  
48  
49  
50  
51

### 52 *Reluctance to open a “can of worms”*

53  
54

55 Professionals at nearly every practice mentioned the term “can of worms” to express unease  
56 with case-finding for depression. This metaphor indicated professional perceptions of both  
57  
58  
59  
60

1  
2  
3 patient discomfort with being asked about emotions and their own emotional labour in asking  
4 the questions. “Can of worms” helped articulate the belief that case-finding for depression  
5 was anticipated as a problematic part of the consultation and threatened to derail routines.  
6  
7 Professionals anticipated having to manage and close down answers before patients began  
8 to give them; this often informed their immediate response to patients’ answers regardless of  
9 what patients said.  
10

11  
12 Many felt that by identifying a problem, it was their duty to uncover further the scale of the  
13 problem and to discuss this further with the patient, rather than requesting that the patient  
14 should make an appointment to discuss this with the doctor or when there would be more  
15 time to devote to this. It was hard to move the consultation onto the rest of the review. This  
16 often led to the questions being asked in a manner that made it difficult for the patient to  
17 answer ‘yes’, such as “you have no problems coping, do you?” pre-empting any difficulties  
18 the questions may cause.  
19  
20  
21  
22  
23  
24  
25  
26  
27  
28

29  
30 “Then Nurse 1 said *“it’s a question that makes you sigh, makes your heart heavy,*  
31 *because you’re there and you say “you’ve been down and depressed?”* and she said  
32  
33 “loads of them saying “yes” and she’s thinking ‘no, you’re not, you’re not, depressed,  
34 depressed, you’re just a bit down, a bit fed up, aren’t we all!’ So then she has to say  
35  
36 “Oh, why do you think that?” and it starts this 10 minute conversation that she really  
37 didn’t want to be having, because she’s had to do three blood pressure readings,  
38 loads of blood tests, trouble getting a vein, had to check their feet, loads of faffing  
39 around, she’s only got 20 minutes.” Field notes Practice F  
40  
41  
42  
43  
44  
45  
46

47 Patients seldom answered with a simple “yes” or “no” and brought up specific difficulties,  
48 such as bereavement. Following an initial acknowledgement, professionals then tended to  
49 move consultations on without discussing the effects of these life events on mood.  
50  
51 Therefore, professionals prematurely shut down patient responses suggesting emotional  
52 problems to reduce the risk of extended consultations.  
53  
54  
55

56  
57 Nurse: *Are you alright, you haven’t been having little interest in doing things, or?*  
58  
59  
60

1  
2  
3 Patient: *No, no.*

4 Nurse: *Are you fine, are you okay? That's okay.*

5  
6  
7 Patient: *It's been 10 years since I've lost [woman's name].*

8  
9 Nurse: *Is it, what, is that your wife?*

10  
11 Patient: *Yes.*

12  
13 Nurse: *10 years? That's a long time, isn't it? Can I just check your tablets then, do*  
14  
15 *you take aspirin, [lists medication]...* Observation 23

16  
17  
18 Some health care professionals talked about the emotional labour involved in case-finding.  
19  
20 Discussing depression was seen as being emotionally difficult and required feeling strong in  
21  
22 themselves, in order to cope with the answer. The emotional burden was exacerbated by  
23  
24 the professional's perception that regardless of the outcome of case-finding, there wouldn't  
25  
26 be in any change for the better for the patient. They perceived they were expending a great  
27  
28 deal of emotional labour on something that did not improve patient care and this  
29  
30 compounded their feelings.

31  
32  
33 “[The nurse] said she screened a woman with COPD who then cried and cried and  
34  
35 then refused help and said she would sort herself out. This woman refused support  
36  
37 and refused to quit smoking. Then she screened a man who was overweight and  
38  
39 she'd just told him how serious his weight was and he cried about his weight and  
40  
41 then she offered support with mood and weight loss and he said no. So she said  
42  
43 most often it opens a can of worms, is demanding and difficult and rarely does  
44  
45 anything come of it.” Field notes practice B

#### 46 47 *Patients being unaware of depression risk or case-finding taking place*

48  
49  
50 Many patients undergoing case-finding did not see themselves as the type of people who  
51  
52 would be prone to depression and did not understand why they were asked. They  
53  
54 appreciated the idea that people should experience case-finding for depression but  
55  
56 distanced themselves from the identity of those people. This sometimes led to defensive or  
57  
58  
59  
60

1  
2  
3 even defiant answers, or deflecting questions with humour in an apparent attempt to  
4 illustrate how preposterous it was to suspect that they might be suffering from depression.  
5  
6 This contradictory position of wanting everyone else to experience case-finding, seeing the  
7 purpose/necessity of asking the questions but, in contrast, not feeling they should be  
8 questioned and thus derided the process or made light of it. This illustrates that the case-  
9 finding process in itself does not impact on patient self-perception of who may suffer from  
10 depression and thus does not enable them to answer the questions honestly and openly.  
11 They were concerned that they were being seen as someone who could not cope. This  
12 especially occurred when the patient felt they had needed to be defensive over their lifestyle  
13 choices, such as diet, exercise, alcohol consumption, just before being asked case-finding  
14 questions. The review was seen as a 'telling off' for not doing the right things which then  
15 made it difficult to answer subjective questions about mood.  
16

17  
18  
19  
20  
21  
22  
23  
24  
25  
26  
27 Nurse: *So during the past month have you been bothered by feeling down or*  
28  
29  
30  
31  
32  
33  
34  
35  
36  
37  
38  
39  
40  
41  
42  
43  
44  
45  
46  
47  
48  
49  
50  
51  
52  
53  
54  
55  
56  
57  
58  
59  
60  
*depressed or hopeless at all?*

Patient looks perplexed.

Patient: *I'm always...* (His voice cracks and pretends to cry and rub his eyes like a  
child) *Am I heck!*

Fieldnote: Nurse shuffles in her seat and leans forward. She's smiling but not 100%  
comfortable. Observation 24

Interviewed patients articulated the belief that the professionals would pick up mood  
problems or not coping without the need for such questions. They felt being aware of  
depression was important in a generalised context but it did not fit with who they were, and  
so found it hard to understand in the context of a chronic disease review.

Patient: *I mean if you're, if you're down they don't have to ask, they know so they*  
*start talking about it.* Interview 2

Several patients admitted difficulty with answering questions about mood within the chronic  
disease review during the interviews. They did not feel it was the appropriate place to

1  
2  
3 discuss mood and that the chronic disease review took over the consultation. Some  
4 mentioned that they would like to be asked at a separate appointment just to cover mood,  
5  
6 although also understood the difficulties in achieving this.  
7  
8

9  
10 *“Just the fact that it’s like a, a review appointment and that I’m under time pressure*  
11 *so it’s not, I feel like if I am to be asked about like depression and something like that,*  
12 *there has to be a separate one (I: right) or like something depression, or like mood,*  
13 *sort of like mental illness or like anxiety or whatever, like related, an appointment*  
14 *related specifically to that or like a clinic specifically related to that.” Interview 21*  
15  
16  
17  
18

19  
20 Patients were mostly unaware of the increased prevalence of depression in chronic illness,  
21 although felt they understood why it might occur. They suggested that introducing the case-  
22 finding questions following an explanation that depression was more common in chronic  
23 illness might facilitate disclosure; this rarely happened in practice.  
24  
25  
26  
27  
28

29  
30 *Researcher: So when the nurse asks you about your mood... just like I’m trying to*  
31 *imagine your perspective, why do you think that she’s asking these questions*  
32 *usually when you get asked?*  
33  
34  
35

36  
37 *Patient: I don’t know really, I didn’t know whether it was because of my history [of*  
38 *depression] or... I didn’t realise that people with heart problems and diabetes get*  
39 *depressed. I suppose if you’re not well or you’ve got on going things with you, I*  
40 *suppose it can depress you.” Interview 44*  
41  
42  
43  
44

#### 45 *Competing practice priorities*

46  
47 Practices varied in how they prioritised and organised case-finding for depression. Some  
48 practices devoted a lot of time and energy whilst others considered that some elements of  
49 QOF, such as the depression indicators, required too much effort for too little gain.  
50  
51  
52  
53  
54  
55  
56  
57  
58  
59  
60

1  
2  
3 Field notes, Practice B: This leads to a debate over the decision between QOF  
4 payments and the work put in to achieve those payments. GPs are saying they  
5 should “*choose their battles.*”  
6  
7  
8  
9

10 One practice did not concentrate on QOF at all and offered a different style of practice to  
11 their patients, with patients being seen as and when they wanted and most staff being  
12 unaware of the QOF domains and items needed, or where to find them on the computer  
13 system. Despite this, the nursing staff still used the QOF template to conduct the chronic  
14 disease reviews.  
15  
16  
17  
18  
19

20 “I ask how many patients haven’t been screened for depression in the last 15months.  
21  
22

23 No one knows how to find this out (including the Practice Manager and the IT guy).”  
24  
25

26 Field notes Practice J  
27

28 Five out of 63 patients had positive results to case-finding; practices subsequently acted on  
29 one of these. Two patients who had negative case-finding subsequently consulted to seek  
30 help for mood problems. Our follow up highlighted inconsistent systems and lines of  
31 communication within practices for dealing with positive result on case-finding . Although  
32 GPs were aware that nursing staff undertook case finding, many did not know how a positive  
33 case-finding would be communicated to them. Nurses assumed that GPs reviewed the case-  
34 finding outcome when seeing patients following reviews but this was seldom the case. For  
35 example, one patient who had a positive result was asked to return a PHQ9 which indicated  
36 moderate depression symptoms. This was filed without notification to a GP and only picked  
37 up on our clinical record review.  
38  
39  
40  
41  
42  
43  
44  
45  
46  
47

48 Practices in areas with less deprivation seemed more likely to have a specified system for  
49 following up positive case-finding results.  
50  
51

52 “[The nurse] said if they answered they were depressed she’d do the PHQ9 with  
53 them and make them an appointment to see the Dr but she felt the Dr wouldn’t do  
54 anything for them and doing the PHQ9 makes her run late so she’s conflicted  
55  
56  
57  
58  
59  
60



1  
2  
3 about how useful it is to screen if you feel no one cares about the result.” Field  
4 notes Practice A  
5

6  
7 “[The doctor] said she didn’t really look at the mental health stuff. I said *“Is there like a*  
8 *system in place or does a score of two trigger anything, or?”* and she said *“no, maybe*  
9 *we need to look at that.”* But she left it there.” Field notes Practice F  
10  
11  
12

## 13 14 15 **Discussion**

16  
17  
18 Case-finding for depression did not naturally fit within primary care consultations. It  
19 appeared to cause discordance between professionals and patients. Professionals  
20 struggled to align case-finding with a person-centred approach and were wary of the risk of  
21 patients’ emotional issues derailing routine reviews. Professionals believed it was good to  
22 ask about mental health but disliked the structure of the PHQ-2 and feeling forced to add it to  
23 consultations. They subsequently responded by going ‘off script’ or discounting cues.  
24 Patients sometimes did not understand why the case-finding questions were being asked, or  
25 did not see themselves as the type of people prone to depression. This led to defensiveness  
26 or even defiance in their responses, especially if not anticipated as part of their review.  
27 Practice responses to case finding outcomes were haphazard, which may have reflected  
28 professional ambivalence towards depression case-finding and the available treatment  
29 options for those identified as having depression.  
30  
31  
32  
33  
34  
35  
36  
37  
38  
39  
40  
41  
42

43 Case-finding for depression exemplifies what happens when attempts are made to fit  
44 apparently straightforward but deceptively complex interventions into primary care  
45 consultations and systems. Previously, anecdotal evidence and interviews with GPs have  
46 suggested that implementing case-finding was more difficult than intended [27 34 35]. This  
47 study provides clear evidence to the barriers faced by professionals and patients in  
48 implementing depression case-finding in practice, as well as observational data of what  
49 actually happens in practice that both parties may not be aware of. Implementing  
50  
51  
52  
53  
54  
55  
56  
57  
58  
59  
60

1  
2  
3 depression case-finding is different to other QOF targets as the topic itself is subject to  
4  
5 significant stigma from both parties.  
6

7  
8 This study provides the strongest evidence yet that the principle of interrupting the flow of  
9  
10 clinical conversation to ask out-of-context questions about sensitive issues has many  
11  
12 significant barriers in clinical consultations. Much has been written about how QOF checklist  
13  
14 approaches have disrupted consultation flows and led to the patient agenda being unheard  
15  
16 [36-39]. This is part of a wider phenomenon. For example, Rousseau *et al* demonstrated  
17  
18 how a set of computerised prompts conflicted with established consultation processes [40].  
19  
20 Adding the case-finding questions to these processes is inappropriate when the scripts and  
21  
22 protocols have already created discordance between agendas. Such experience highlights  
23  
24 the need for systematic development and evaluation of such interventions to ensure  
25  
26 acceptability and feasibility before wider roll-out [41]. Despite their apparent simplicity, our  
27  
28 study has shown that depression case-finding questions were not implemented consistently  
29  
30 within consultations and practice routines.  
31

32  
33 Our findings also help explain the lack of benefit of case-finding when it is implemented  
34  
35 outside of collaborative care models [14]. We identified mixed attitudes towards case-finding  
36  
37 amongst both professionals and patients, coupled with the absence of agreed pathways for  
38  
39 patient follow-up and management. Collaborative care, with explicit monitoring and  
40  
41 structured management of both physical and mental health problems could help alleviate  
42  
43 some of the barriers identified in this study.  
44

45  
46 Study limitations mainly related to the nature of our observations, and sampled practices.

47  
48 We were aware of the intrusive nature of observation and the likelihood that people behaved  
49  
50 differently when under observation. For example, professionals may have made more of an  
51  
52 effort to ask the PHQ2 questions sensitively, or ask them at all. When possible, observation  
53  
54 began following a period of familiarisation to allow the healthcare professional to grow used  
55  
56 to the researcher's presence. A week may also be insufficient to fully understand all practice  
57  
58 processes and relationships; however, similar approaches have produced substantial  
59  
60

1  
2  
3 insights into healthcare organisational behaviour elsewhere [42]. Even allowing for these  
4 limitations, it is striking how often professionals did deviate from recommended practice.

5  
6 Professionals and patients are often used to the presence of a third party during  
7 consultations for training purposes, although some of the nurses observed did comment on  
8 feeling under pressure to demonstrate that they were following procedures correctly.

9  
10 The generalizability of our findings may be limited given that this study took place within one  
11 geographical area. However, Leeds is typical of UK cities in terms of social deprivation  
12 indices, demographics, characteristics of primary care services and distribution of common  
13 diseases such as CHD and diabetes [43]. Furthermore, we sampled a relatively diverse  
14 range of practices and found that practice characteristics, such as deprivation and QOF  
15 achievement, affected how case-finding was approached. Opportunistic case findings were  
16 under-represented in our sample of 63 consultations but we did not find any systematic  
17 differences from chronic disease review case findings in our analysis.

18  
19 We identified a range of problems with incentivised case-finding for depression. Our  
20 accompanying interrupted time series analysis indicates that incentivised case-finding did  
21 change clinical behaviour, increasing new depression-related diagnoses and, compared with  
22 untargeted patients with chronic illness, perpetuated increasing rates of antidepressant  
23 prescribing [29]. It is difficult to predict with any confidence whether greater changes would  
24 have occurred if case-finding had been applied with greater fidelity. However, our findings  
25 have broader implications for efforts to improve detection of depression in people with  
26 chronic illness.

27  
28 Specifically, all of patients, professionals and healthcare systems need to be prepared in  
29 advance of case-finding. Firstly, for patients, experience with the diagnostic disclosure of  
30 illnesses such as dementia and cancer suggests that acceptance is facilitated by a series of  
31 negotiated steps rather than a 'one-off' process [44 45]. For example, patients in our study  
32 indicated they would have been more receptive to case-finding had they received  
33 information beforehand about the higher prevalence of depression in chronic physical illness.

1  
2  
3 It is also possible that the act of case-finding does form an initial step in helping patients  
4 consider and come to terms with a diagnosis of depression, given that we found patients  
5 with negative case-finding subsequently consulted with mood problems. Secondly,  
6 professional attitudes towards and skills required in the detection of depression need to be  
7 examined. Some voiced unease about whether they were incorporating the questions  
8 correctly within consultations or uncertainty about how to handle potential new diagnoses,  
9 particularly nursing staff. Thirdly, resources and care pathways need to be optimised to  
10 accommodate detection and follow up. Patients identified through case-finding are more  
11 likely to have mild-moderate rather than severe depression and less likely to benefit from  
12 antidepressant treatment [46 47]. Resources are needed to manage those identified through  
13 case-finding recommended by clinical guidelines. Health professionals were understandably  
14 reluctant to open up a “can of worms” during tightly restricted chronic illness reviews; the  
15 exploration of sensitive issues requires greater flexibility in consultation time. We also found  
16 instances where positive results on case-finding - were not acted upon given the absence of  
17 explicitly agreed pathways within practices.

18  
19  
20  
21  
22  
23  
24  
25  
26  
27  
28  
29  
30  
31  
32  
33  
34 There are more general lessons beyond depression detection. Mood disorders are not the  
35 only sensitive issue raised during chronic illness reviews. Our findings should prompt a  
36 reappraisal of how such reviews are designed and implemented for other emotionally-laden  
37 problems integral to chronic illness care, such as weight management, sexual dysfunction  
38 and alcohol misuse [48]. Health professionals may welcome structured protocols to help  
39 ensure coverage of key issues; there is evidence that prompting interventions have a small  
40 to modest effect on practice and patient outcomes [49]. However, such approaches have  
41 been less successful in addressing relatively complex clinical behaviours, especially for  
42 chronic illness management [50]. The subsequent challenge for quality improvement  
43 programmes and research is to further explore and evaluate how to develop interventions  
44 which can be embedded within primary care systems and consultations to improve  
45 population outcomes whilst preserving patient-centred care. The National Institute for Health  
46  
47  
48  
49  
50  
51  
52  
53  
54  
55  
56  
57  
58  
59  
60

and Care Excellence guidance on implementation recommends direct observation of practice as one way to identify potential barriers to changing practice [51] and although we have demonstrated the value of direct observation in evaluating new policy initiatives compared to (say) interview studies alone, it is not routinely undertaken when introducing new QOF indicators[11].

Incentivised case-finding exacerbated tensions between perceived patient-centredness and the time-limited routine of the consultation. Both professionals and patients reacted to the imposition of case-finding by adapting, or even subverting, the process recommended by national guidance. Despite their apparent simplicity, the case-finding questions are not consultation-friendly, and acceptable alternative ways to raise mood disorders merit further exploration, as well as guidance on how to introduce the questions so patients don't feel depression is something that happens to 'other people' as our patient's awareness theme suggests. Practice teams need clearer guidance on the pathway for people with likely depression which can be accommodated within available systems and resources.

#### **What is already known on this topic**

- Case-finding for depression was incentivised in UK primary care to increase depression diagnosis and management.
- Evidence that case-finding has improved depression outcomes is lacking and health care professionals have expressed dissatisfaction with its implementation.

#### **What this study adds**

- Patients and health care professionals subverted the standardised process of depression case-finding to suit their consultation style and needs.
- Case-finding needs to be aligned with structured care processes and how healthcare professionals and patients think about mood problems in chronic physical disease.

### **Ethics Approval**

This study was approved by the South West - Exeter Research Ethics Committee (reference 11/SW/0335). The participants gave informed consent before taking part.

### **Funding**

This paper summarises independent research funded by the National Institute for Health Research (NIHR) under its Research for Patient Benefit (RfPB) Programme (Grant Reference Number PB-PG-0110-21046). The views expressed are those of the authors and not necessarily those of the NHS, the NIHR or the Department of Health. Study sponsors, the University of Leeds, and NIHR RfPB had no role in study design, in the collection, analysis and interpretation of data, in the writing of the report, and in the decision to submit the article for publication. All authors had full access to all of the data in the study and can take responsibility for the integrity of the data and the accuracy of the data analysis.

**Transparency Declaration**

Dr Sarah L Alderson, the lead author (the manuscript's guarantor), affirms that the manuscript is an honest, accurate, and transparent account of the study being reported; that no important aspects of the study have been omitted; and that any discrepancies from the study as planned have been explained.

**Data sharing statement**

Data sharing: no additional data available.

**Contributorship Statement**

RF and AH conceived the project. RF was principal investigator. SA and KM designed the study. SA and AR were responsible for running the project. AR was responsible for data collection. All authors interpreted the data and findings. SA wrote the first draft of the manuscript. RF commented on the first draft and all authors commented on further revisions. SA is guarantor of the paper.

**Competing interests**

All authors received funding from National Institute of Health Research to undertake this study.

## References

1. Goldney RD, Phillips PJ, Fisher LJ, et al. Diabetes, Depression, and Quality of Life. *Diabetes Care* 2004;**27**(5):1066-70 doi: 10.2337/diacare.27.5.1066[published Online First: Epub Date]].
2. Rudisch B, Nemeroff CB. Epidemiology of comorbid coronary artery disease and depression. *Biological Psychiatry* 2003;**54**(3):227-40
3. Carney RM, Freedland KE, Miller GE, et al. Depression as a risk factor for cardiac mortality and morbidity: A review of potential mechanisms. *Journal of Psychosomatic Research* 2002;**53**(4):897-902
4. Anderson RJ, Freedland KE, Clouse RE, et al. The Prevalence of Comorbid Depression in Adults With Diabetes: A meta-analysis. *Diabetes Care* 2001;**24**(6):1069-78 doi: 10.2337/diacare.24.6.1069[published Online First: Epub Date]].
5. Simon GE, VonKorff M. Recognition, management, and outcomes of depression in primary care. 1995(2):99-105
6. Barth J, Schumacher M, Herrmann-Lingen C. Depression as a Risk Factor for Mortality in Patients With Coronary Heart Disease: A Meta-analysis. *Psychosom. Med.* 2004;**66**(6):802-13 doi: 10.1097/01.psy.0000146332.53619.b2[published Online First: Epub Date]].
7. Katon W, Ciechanowski P. Impact of major depression on chronic medical illness. *Journal of Psychosomatic Research* 2002;**53**(4):859-63
8. National Institute of Clinical Excellence. Depression in adults with a chronic physical health problem: treatment and management. NICE. : NICE, 2009.
9. New Zealand Guidelines Group. Identification of Common Mental Disorders and Management of Depression in Primary Care. An Evidence-based Best Practice Guideline. Wellington, 2008.
10. US Preventative Services Task Force. Screening for Depression in Adults: U.S. Preventive Services Task Force Recommendation Statement. *Annals of Internal Medicine* 2009;**151**(11):784-92 doi: 10.1059/0003-4819-151-11-200912010-00006[published Online First: Epub Date]].
11. University of Birmingham and University of York Health Economics Consortium. NM49 indicator development feedback report 2012.
12. BMJ Best Practice. Screening: Patient Health Questionnaire-2 (PHQ-2). BMJ Best Practice 2010. <http://bestpractice.bmj.com/best-practice/monograph/55/prevention.html>.
13. Health and Social Care Information Centre. Quality Outcomes Framework 2012/13 results. Secondary Quality Outcomes Framework 2012/13 results 2013. <http://qof.hscic.gov.uk/index.asp>.
14. Gilbody S, Sheldon T, House A. Screening and case-finding instruments for depression: a meta-analysis. *Canadian Medical Association Journal* 2008;**178**(8):997-1003 doi: 10.1503/cmaj.070281[published Online First: Epub Date]].
15. Dowrick C, Buchan I. Twelve month outcome of depression in general practice: does detection or disclosure make a difference? *BMJ* 1995;**311**(7015):1274-76
16. Gilbody SM, House A, Sheldon T. Screening and case finding instruments for depression [Systematic Review]. *Cochrane Database of Systematic Reviews* 2009;**3**:3
17. Pignone MP, Gaynes BN, Rushton JL, et al. Screening for Depression in Adults: A Summary of the Evidence for the U.S. Preventive Services Task Force. *Annals of Internal Medicine* 2002;**136**(10):765-76 doi: 10.7326/0003-4819-136-10-200205210-00013[published Online First: Epub Date]].



- 1  
2  
3 18. Gilbody S, Sheldon T, Wessely S. Should we screen for depression? *BMJ* 2006;**332**(7548):1027-30  
4 doi: 10.1136/bmj.332.7548.1027[published Online First: Epub Date]].
- 5  
6 19. National Screening Committee. Programme Appraisal Criteria. Secondary Programme Appraisal  
7 Criteria 2013. [www.screening.nhs.uk/criteria](http://www.screening.nhs.uk/criteria).
- 8  
9 20. Serumaga B, Ross-Degnan D, Avery A, et al. Effect of pay for performance on the management  
10 and outcomes of hypertension in the United Kingdom: interrupted time series study. *BMJ*  
11 2011;**342**:d108
- 12  
13 21. Campbell SM, Reeves D, Kontopantelis E, et al. Effects of Pay for Performance on the Quality of  
14 Primary Care in England. *N Engl J Med* 2009;**361**:368-78
- 15  
16 22. Scott A, Sivey P, Ait Ouakrim D, et al. The effect of financial incentives on the quality of health  
17 care provided by primary care physicians. *Cochrane Database Syst Rev* 2011(9):CD008451
- 18  
19 23. Checkland K, Harrison S, McDonald R, et al. Biomedicine, holism and general medical practice:  
20 responses to the 2004 General Practitioner contract. *Sociology of Health and Illness*  
21 2008;**30**:788-803
- 22  
23 24. McDonald R, Harrison S, Checkland K, et al. Impact of financial incentives on clinical autonomy  
24 and internal motivation in primary care: ethnographic study. *BMJ* 2007;**334**(7608):1333-34
- 25  
26 25. Maisey S, Steel N, Marsh R, et al. Effects of payment for performance in primary care: qualitative  
27 interview study. *Journal of Health Services Research & Policy* 2008;**13**(3):133-39 doi:  
28 10.1258/jhsrp.2008.007118[published Online First: Epub Date]].
- 29  
30 26. Mitchell C, Dwyer R, Hagan T, et al. Impact of the QOF and the NICE guideline in the diagnosis  
31 and management of depression: a qualitative study. *Br. J. Gen. Pract.* 2011;**61**(586):e279-e89  
32 doi: 10.3399/bjgp11X572472[published Online First: Epub Date]].
- 33  
34 27. Coventry PA, Hays R, Dickens C, et al. Talking about depression: a qualitative study of barriers to  
35 managing depression in people with long term conditions in primary care. *BMC Fam Pract*  
36 2011;**12**:10 doi: 10.1186/1471-2296-12-10[published Online First: Epub Date]].
- 37  
38 28. Dowrick C, Leydon GM, McBride A, et al. Patients' and doctors' views on depression severity  
39 questionnaires incentivised in UK quality and outcomes framework: qualitative study. *Br.*  
40 *Med. J.* 2009;**338**:6 doi: b663  
41 10.1136/bmj.b663[published Online First: Epub Date]].
- 42  
43 29. McLintock K, Russell A, West R, et al. Effect of financial incentives on screening for depression in  
44 patients with chronic disease in the United Kingdom: an interrupted time series study.  
45 Manuscript in preparation 2013
- 46  
47 30. Practitioners RCoG. Supporting Carers: An action guide for general practitioners and their teams.:  
48 Royal College of General Practitioners, 2011.
- 49  
50 31. Burden AD, Boon MH, Leman J, et al. Diagnosis and management of psoriasis and psoriatic  
51 arthritis in adults: summary of SIGN guidance. *BMJ* 2010;**341** doi:  
52 10.1136/bmj.c5623[published Online First: Epub Date]].
- 53  
54 32. Collier F, Smith RC, Morton CA. Diagnosis and management of hidradenitis suppurativa. *BMJ*  
55 2013;**346** doi: 10.1136/bmj.f2121[published Online First: Epub Date]].
- 56  
57 33. Emerson RM, Fretz RI, Shaw LL. *Writing ethnographic fieldnotes*. 2nd ed: University of Chicago  
58 Press, 2011.
- 59  
60 34. Anekwe L. QOF depression indicators face axe. *Pulse* 2011(June 2011)

- 1  
2  
3 35. Maxwell M, Harris F, Hibberd C, et al. A qualitative study of primary care professionals' views of  
4 case finding for depression in patients with diabetes or coronary heart disease in the UK.  
5 BMC Fam Pract 2013;**14**:46  
6  
7 36. Chew-Graham CA, Hunter C, Langer S, et al. How QOF is shaping primary care review  
8 consultations: a longitudinal qualitative study. BMC Fam Pract 2013;**14**(1):103  
9  
10 37. Campbell SM, McDonald R, Lester H. The experience of pay for performance in English family  
11 practice: a qualitative study. Annals of Family Medicine 2008;**6**(3):228-34  
12  
13 38. Hannon KL, Lester HE, Campbell SM. Patients' views of pay for performance in primary care: a  
14 qualitative study. Br. J. Gen. Pract.;**62**(598):e322-e28 doi: 10.3399/bjgp12X641438[published  
15 Online First: Epub Date]].  
16  
17 39. Lester H, Matharu T, Mohammed MA, et al. Implementation of pay for performance in primary  
18 care: a qualitative study 8 years after introduction. Br. J. Gen. Pract. 2013;**63**(611):e408-e15  
19 doi: 10.3399/bjgp13X668203[published Online First: Epub Date]].  
20  
21 40. Rousseau N, McColl E, Newton J, et al. Practice based, longitudinal, qualitative interview study of  
22 computerised evidence based guidelines in primary care. BMJ 2003;**326**(7384):314 doi:  
23 10.1136/bmj.326.7384.314[published Online First: Epub Date]].  
24  
25 41. Craig P, Dieppe P, Macintyre S, et al. Developing and evaluating complex interventions: the new  
26 Medical Research Council guidance. BMJ 2008;**337** doi: 10.1136/bmj.a1655[published Online  
27 First: Epub Date]].  
28  
29 42. Dixon-Woods M, Leslie M, Bion J, et al. What Counts? An Ethnographic Study of Infection Data  
30 Reported to a Patient Safety Program. Milbank Quarterly 2012;**90**(3):548-91 doi:  
31 10.1111/j.1468-0009.2012.00674.x[published Online First: Epub Date]].  
32  
33 43. Public Health England. National General Practice Profiles - Leeds PCT. Secondary National  
34 General Practice Profiles - Leeds PCT 2013.  
35 [http://www.apho.org.uk/PracProf/Profile.aspx#mod,2,pyr,2012,pat,2,par,E16000074,are,-](http://www.apho.org.uk/PracProf/Profile.aspx#mod,2,pyr,2012,pat,2,par,E16000074,are,-sid1,2000002,ind1,243-4,sid2,2000005,ind2,-)  
36 [sid1,2000002,ind1,243-4,sid2,2000005,ind2,-](http://www.apho.org.uk/PracProf/Profile.aspx#mod,2,pyr,2012,pat,2,par,E16000074,are,-sid1,2000002,ind1,243-4,sid2,2000005,ind2,-)  
37  
38 44. Fallowfield L, Jenkins V. Effective communication skills are the key to good cancer care. European  
39 journal of cancer (Oxford, England : 1990) 1999;**35**(11):1592-7  
40  
41 45. Lecouturier J, Bamford C, Hughes J, et al. Appropriate disclosure of a diagnosis of dementia:  
42 identifying the key behaviours of 'best practice'. BMC Health Services Research 2008;**8**(1):1-  
43 10 doi: 10.1186/1472-6963-8-95[published Online First: Epub Date]].  
44  
45 46. Coyne JC, Schwenk TL, Fechner-Bates S. Nondetection of depression by primary care physicians  
46 reconsidered. General Hospital Psychiatry 1995;**17**(1):3-12 doi:  
47 [http://dx.doi.org/10.1016/0163-8343\(94\)00056-J](http://dx.doi.org/10.1016/0163-8343(94)00056-J)[published  
48 Online First: Epub Date]].  
49  
50 47. Arroll B, Goodyear-Smith F, Crengle S, et al. Validation of PHQ-2 and PHQ-9 to screen for major  
51 depression in the primary care population. Ann Fam Med 2010;**8**(4):348-53 doi:  
52 10.1370/afm.1139[published Online First: Epub Date]].  
53  
54 48. Crosson JC, Heisler M, Subramanian U, et al. Physicians' Perceptions of Barriers to Cardiovascular  
55 Disease Risk Factor Control among Patients with Diabetes: Results from the Translating  
56 Research into Action for Diabetes (TRIAD) Study. The Journal of the American Board of  
57 Family Medicine 2010;**23**(2):171-78 doi: 10.3122/jabfm.2010.02.090125[published Online  
58 First: Epub Date]].  
59  
60 49. Shojania Kaveh G, Jennings A, Mayhew A, et al. The effects of on-screen, point of care computer  
reminders on processes and outcomes of care. Cochrane Database of Systematic Reviews  
2009; (3). <http://onlinelibrary.wiley.com/doi/10.1002/14651858.CD001096.pub2/abstract>.

1  
2  
3 50. Grimshaw JM, Eccles MP, et al. Knowledge translation of research findings. Implementation  
4 Science 2012;7(50):1-29

5  
6 51. National Institute for Health and Care Excellence. Into practice guide: Using NICE guidance and  
7 quality standards to improve practice, 2013.  
8  
9  
10  
11  
12  
13  
14  
15  
16  
17  
18  
19  
20  
21  
22  
23  
24  
25  
26  
27  
28  
29  
30  
31  
32  
33  
34  
35  
36  
37  
38  
39  
40  
41  
42  
43  
44  
45  
46  
47  
48  
49  
50  
51  
52  
53  
54  
55  
56  
57  
58  
59  
60

For peer review only

**Table 1 – Observed practice characteristics**

| Surgery    | QOF score* | List Size* | Deprivation Score* | Patients Recruited |
|------------|------------|------------|--------------------|--------------------|
| Practice A | Low        | Low        | Low                | 3                  |
| Practice B | Low        | High       | High               | 13                 |
| Practice C | Low        | High       | Low                | 5                  |
| Practice D | High       | High       | Low                | 6                  |
| Practice E | High       | High       | High               | 6                  |
| Practice F | High       | Low        | High               | 5                  |
| Practice G | Low        | High       | Low                | 5                  |
| Practice H | Low        | Low        | Low                | 5                  |
| Practice I | High       | High       | Low                | 4                  |
| Practice J | Low        | Low        | High               | 5                  |
| Practice K | Low        | Low        | High               | 4                  |
| Practice L | High       | Low        | Low                | 2                  |

\* Compared to Primary Care Trust median

Table 2 - Patient demographics in observed consultations

|                                                | <u>No. of patients</u> | <u>% of patients</u> |
|------------------------------------------------|------------------------|----------------------|
| <b><u>Gender</u></b>                           |                        |                      |
| Female                                         | 21                     | 33%                  |
| Male                                           | 42                     | 67%                  |
| <b><u>Age group</u></b>                        |                        |                      |
| 18-30                                          | 7                      | 11%                  |
| 31-50                                          | 5                      | 8%                   |
| 51-64                                          | 18                     | 29%                  |
| 65-79                                          | 28                     | 44%                  |
| 80+                                            | 5                      | 8%                   |
| <b><u>Chronic Illness</u></b>                  |                        |                      |
| CHD                                            | 13                     | 21%                  |
| DM                                             | 46                     | 73%                  |
| CHD & DM                                       | 4                      | 6%                   |
| <b><u>Ethnicity</u></b>                        |                        |                      |
| White British                                  | 49                     | 78%                  |
| Mixed British                                  | 1                      | 2%                   |
| White Irish                                    | 2                      | 3%                   |
| Chinese                                        | 1                      | 2%                   |
| Black Caribbean                                | 5                      | 8%                   |
| Pakistani                                      | 3                      | 5%                   |
| British Asian                                  | 1                      | 2%                   |
| Indian                                         | 1                      | 2%                   |
| <b><u>Previous diagnosis of depression</u></b> |                        |                      |
| Yes                                            | 9                      | 14%                  |
| No                                             | 54                     | 86%                  |

Figure 1. Flow chart of idealised depression case-finding process and barriers identified.

1  
2  
3 **Incentivised case finding for depression in patients with chronic heart disease and**  
4 **diabetes in primary care: an ethnographic study**  
5

6 Sarah L Alderson, Amy M Russell, Kate McLintock, Barbara Potrata, Allan House, Robbie  
7 Foy

8 Leeds Institute of Health Sciences, Charles Thackrah Building, University of Leeds, 101  
9 Clarendon Road, Leeds, LS2 9LJ. Sarah L Alderson  
10 Clinical Lecturer in Primary Care  
11

12  
13 Leeds Institute of Health Sciences, Charles Thackrah Building, University of Leeds, 101  
14 Clarendon Road, Leeds, LS2 9LJ. Amy M Russell  
15 Senior Research Fellow  
16

17  
18 Leeds Institute of Health Sciences, Charles Thackrah Building, University of Leeds, 101  
19 Clarendon Road, Leeds, LS2 9LJ. Kate McLintock  
20 Clinical Lecturer in Primary Care  
21

22  
23 Leeds Institute of Health Sciences, Charles Thackrah Building, University of Leeds, 101  
24 Clarendon Road, Leeds, LS2 9LJ. Barbara Potrata  
25 Research Fellow  
26

27  
28 Leeds Institute of Health Sciences, Charles Thackrah Building, University of Leeds, 101  
29 Clarendon Road, Leeds, LS2 9LJ. Allan House  
30 Professor of Liaison Psychiatry  
31

32  
33 Leeds Institute of Health Sciences, Charles Thackrah Building, University of Leeds, 101  
34 Clarendon Road, Leeds, LS2 9LJ. Robbie Foy  
35 Professor of Primary Care  
36

37  
38 The Corresponding Author has the right to grant on behalf of all authors and does grant on  
39 behalf of all authors, a worldwide licence to the Publishers and its licensees in perpetuity, in  
40 all forms, formats and media (whether known now or created in the future), to i) publish,  
41 reproduce, distribute, display and store the Contribution, ii) translate the Contribution into  
42 other languages, create adaptations, reprints, include within collections and create  
43 summaries, extracts and/or, abstracts of the Contribution, iii) create any other derivative  
44 work(s) based on the Contribution, iv) to exploit all subsidiary rights in the Contribution, v)  
45 the inclusion of electronic links from the Contribution to third party material where-ever it may  
46 be located; and, vi) licence any third party to do any or all of the above.  
47  
48  
49  
50  
51  
52  
53  
54  
55  
56  
57  
58  
59  
60

## Abstract

### *Objective*

To examine the process of case-finding for depression in people with diabetes and coronary heart disease within the context of a pay-for-performance scheme.

### *Design*

Ethnographic study drawing upon observations of practice routines and consultations, debriefing interviews with staff and patients, and review of patient records.

### *Setting*

General practices in Leeds, United Kingdom.

### *Participants*

Twelve purposively sampled practices with a total of 119 staff; 63 consultation observations; and 57 patient interviews.

### *Main outcome measure*

Audio-recorded consultations and interviews with patients and health care professionals along with observation field notes were thematically analysed. We assessed outcomes of case-finding from patient records.

### *Results*

Case-finding exacerbated the discordance between patient and professional agendas, the latter already dominated by the tightly structured and time-limited nature of chronic illness reviews. Professional beliefs and abilities affected how case-finding was undertaken; there was uncertainty about how to ask the questions, particularly amongst nursing staff.

Professionals were often wary of opening an emotional “can of worms.” Subsequently, patient responses potentially suggesting emotional problems could be prematurely shut down by professionals. Patients did not understand why they were asked questions about depression. This sometimes led to defensive or even defiant answers to case-finding.

1  
2  
3 Follow up of patients highlighted inconsistent systems and lines of communication for  
4  
5 dealing with positive results on case-finding ~~screened positive cases~~.

### 6 7 *Conclusions*

8  
9  
10 Case-finding does not fit naturally within consultations; both professional and patient  
11  
12 reactions somewhat subverted the process recommended by national guidance. Quality  
13  
14 improvement strategies will need to take account of our results in two ways. First, despite  
15  
16 their apparent simplicity, the case-finding questions are not consultation-friendly, and  
17  
18 acceptable alternative ways to raise the issue of depression need to be supported. Second,  
19  
20 case-finding needs to operate within structured pathways which can be accommodated  
21  
22 within available systems and resources.

### 23 24 **Strengths and limitations of this study**

#### 25 26 **Strengths**

- 27 • Multi-site ethnography of broadly representative general practices
- 28 • Triangulation through use of multiple sources of data

#### 29 30 **Limitations**

- 31 • Potential for clinician and patient behaviour to alter as a response to being observed
- 32 • Short periods of observation in each practice limiting range of types of behaviour  
33 observed
- 34 • Observations within one geographical area, thereby potentially limiting  
35 generalisability



## Introduction

The detection and management of depression associated with chronic physical illness represents a major challenge for primary care. Depression is twice as common in those with chronic physical illness such as coronary heart disease (CHD) and diabetes compared to those without chronic physical illness [1-4]. Such co-morbidity can make depression hard to recognize, especially as symptoms of depression (such as fatigue) overlap with those of chronic physical illnesses [5]. Co-morbidity is also associated with poorer outcomes, including mortality [3 6 7]. One response is case-finding, defined as selective screening for depression in populations at high risk, such as those with chronic illness. This has been recommended by national guidance in the UK [8] and elsewhere. [9 10]. The Quality and Outcomes Framework (QOF), a pay-for-performance scheme in UK primary care, rewarded depression case-finding using two standard screening questions from the Patient Health Questionnaire-2 (PHQ-2) in all patients with CHD or diabetes [11]. The PHQ-2 asks, 'In the past two weeks, have you been bothered by: little interest or pleasure in doing things; and feeling down, depressed or hopeless?' [12] Routine data suggested high levels of [screening case-finding](#), with a national average of 86% of eligible patients screened in 2011-12 [13].

However, there are problems with both the rationale underpinning this recommendation and the means undertaken to promote its implementation in the UK.

Firstly, there is no evidence that case-finding for depression by itself improves patient outcomes [14]. For case-finding to be effective it is important that potential cases are further assessed, diagnosed and offered appropriate clinical management within a structured clinical pathway [15-17]. There was no closely allied incentive in the QOF programme for subsequent patient care. Case-finding should also be considered against other recommended criteria for screening tests, such as acceptability and having an agreed policy about whom to treat as patients [18 19].

1  
2  
3 Secondly, evidence on the effects of financial incentives on primary care practice is, at best,  
4 mixed [20-22]. There are concerns that such incentives undermine professionals' intrinsic  
5 motivation, patient-centeredness, and continuity of care and have led to a 'tick box' culture  
6 as health professionals work through checklists for chronic illness management [21 23-25].  
7 Health professionals themselves have expressed dissatisfaction with incentivised depression  
8 management, particularly the use of incentivised depression severity measurements,  
9 although patients value their use within consultations. [26-28].  
10  
11  
12  
13  
14  
15  
16

17  
18 Our accompanying interrupted time series analysis found that incentivised case finding  
19 increased new depression-related diagnoses in people with diabetes and CHD and  
20 perpetuated rising trends in new prescriptions of antidepressants [29]. Even though this  
21 incentivised case finding ceased in 2013 due to lack of evidence of patient benefit<sup>2</sup>, there  
22 are continuing calls for 'something to be done' to detect and treat depression in high risk  
23 groups [30-32]. However, the professional and patient experiences of incentivised case-  
24 finding, how it affected clinical care, and its fit with the routines of practice life are poorly  
25 understood. We investigated the process of incentivised case-finding during scheduled and  
26 opportunistic reviews of patients with diabetes and CHD.  
27  
28  
29  
30  
31  
32  
33  
34  
35  
36  
37

## 38 **Methods**

### 39 *Design and setting*

40  
41 Our ethnographic design combined direct observation with interviews and review of patient  
42 records. We wanted to build an in-depth understanding of how patient case-finding was  
43 conducted within the context of everyday practice life and routine patient care. The study  
44 took place in general practices in Leeds, UK.  
45  
46  
47  
48  
49  
50

### 51 *Participants*

52  
53 We invited all practices in Leeds to participate. We then sought a purposive sample of  
54 practices using a four-by-two sampling frame based upon whether practice QOF  
55  
56  
57  
58  
59  
60

1  
2  
3 achievement was above or below the Leeds median, further stratified by list size and  
4 deprivation profiles. Practices that consented to participate were booked for a week of  
5 observation, during which we aimed to observe at least three consultations.  
6  
7

8  
9 Practices sent letters of invitation and information packs to patients scheduled for chronic  
10 disease reviews within the observation week. We also approached patients attending for  
11 routine consultations to enable observation of opportunistic case-finding. Practice staff  
12 identified patients due to be asked the case-finding questions and asked if they would be  
13 interested in participating when they arrived at reception for their appointment. All patients  
14 and professionals subsequently observed gave informed consent.  
15  
16  
17  
18  
19  
20  
21

### 22 *Data collection and analysis*

23  
24 An ethnographer (AR) used a funnelling approach to observe and describe the context of  
25 and behaviours within the practice [33], moving to detailed observation and audio-recording  
26 of consultations. Observation considered both verbal and non-verbal features including: how  
27 case-finding questions are framed and asked; events leading up to questioning; patient  
28 verbal and non-verbal reactions and responses; and overall style of the consultation. This  
29 style of observation allowed the researcher to layer the analysis of the consultations with  
30 contextual information providing a richer interpretation of the observation data. She held  
31 semi-structured debriefing interviews with patients who had been observed. The interviews  
32 aimed to explore patient views on the process and experience of the consultation in further  
33 depth. Unstructured interviews took place with the health care professionals involved in  
34 depression case-finding and notes taken on all discussions regarding depression case-  
35 finding. We reviewed patients' medical records six weeks after observation to check for any  
36 subsequent clinical events related to depression identification and management. Events  
37 included appointments where mood was discussed, telephone consultations, depression  
38 severity assessments, referrals to mental health teams or talking therapies and new  
39 prescriptions for depression medication.  
40  
41  
42  
43  
44  
45  
46  
47  
48  
49  
50  
51  
52  
53  
54  
55  
56  
57  
58  
59  
60

1  
2  
3 The perceived relative importance and organisation of QOF-related case-finding may vary  
4 throughout the year. To partly ameliorate this we observed two practices towards the end of  
5 the financial year when practices are typically working hardest to achieve QOF targets.  
6  
7

8  
9 Transcribed data (interviews, observation transcripts and observation notes) were managed  
10 using NVivo9 and coded for themes. Thematic analysis was undertaken by two researchers,  
11 independently coding for the themes and then comparing codes and themes. The analysis  
12 was further refined by using constant comparison of themes, and looking for negative cases  
13 in order to examine for similarities and differences within and between the patients'  
14 perception and observations in different centres. Finally, to improve reliability and validity of  
15 data, we triangulated findings from all three data sources.  
16  
17  
18  
19  
20  
21  
22

### 23 24 25 *Ethical review*

26  
27 The study was approved by National Research Ethics Service Committee South West –  
28 Exeter (11/SW/0335).  
29  
30  
31  
32

### 33 34 **Results**

35  
36 Twelve practices participated and a total of 63 patient consultations were observed (range 2-  
37 13 per practice; Table 1). Practice characteristics were relatively balanced, with five having  
38 QOF achievement above the median for Leeds, five above median population deprivation  
39 scores, and six above median list size. Patients were most commonly male, age 51-79  
40 years, and white British (Table 2). Most (73%) participants had diabetes and nine (14%) had  
41 a previous diagnosis of depression. Nine of the observed case findings took place  
42 'opportunistically' within routine GP appointments. The rest occurred within dedicated  
43 chronic disease clinics, usually with nurses.  
44  
45  
46  
47  
48  
49  
50

51  
52 Based upon available guidance, observations and interviews, we constructed a basic  
53 normative model of the process by which case-finding was expected to improve depression  
54 detection and treatment (Figure 1). We then identified a number of ways in which  
55  
56  
57  
58  
59  
60

1  
2  
3 professional and patient behaviours and beliefs and the working patterns of general  
4  
5 practices subverted or affected the operation of this model. We found five barriers:  
6  
7 discordance between patient and professional agendas; professional uncertainty around  
8  
9 how to undertake the case-finding itself; reluctance to open a “can of worms”; patients being  
10  
11 unaware of depression risk or case-finding taking place; and competing practice priorities  
12  
13 and inconsistent lines of communication around the management of potential cases of  
14  
15 depression.

16  
17  
18 *Discordance between patient and professional agendas*

19  
20  
21 Case-finding often occurred within tightly structured and time-limited chronic illness reviews  
22  
23 required to document QOF processes of care, and appeared to exacerbate existing  
24  
25 discordance. This led to professionals disregarding attempts by patients to steer the  
26  
27 consultation around to their own perceived needs. Patients were often not focused on and  
28  
29 often did not understand the purpose of the review process and used the consultation as an  
30  
31 opportunity to raise other problems. To manage this, professionals often interrupted patients  
32  
33 or returned the consultation to its purpose, discounting clues that the patient had worries  
34  
35 related to the chronic disease being reviewed or other illnesses.

36  
37 Patient: [talking about hypoglycaemic attacks which were a subject of significant  
38  
39 anxiety for this patient (revealed in interview after appointment)] *Only time that I went*  
40  
41 *funny, I had a tooth out and I'd had, I couldn't have any breakfast, or I didn't have any*  
42  
43 *breakfast, because I don't like to be poorly when I've had teeth out, because I used*  
44  
45 *to be when I was younger, am I talking and disturbing....*

46  
47  
48 [Fieldnote] Nurse is trying to measure blood pressure; patient looks agitated.

49  
50 Nurse: *Yes, I think you just probably need to just be quiet for a couple of minutes*  
51  
52 *while I check it, because it's even higher now! We want it to go down! Just try and*  
53  
54 *relax. OK. Observation 29*

1  
2  
3 At this stage in the consultation the patient became distressed, apparently wishing to discuss  
4 further their worries about hypoglycaemia. The professional subsequently moved the  
5 conversation on to another QOF target and no follow up of concerns about hypoglycaemia  
6 was arranged. The patient later told the researcher she was extremely worried about hypos  
7 and was experiencing consistently low mood and high anxiety. The context of chronic illness  
8 reviews was restrictive – in this case an opportunity for direct, subject specific case-finding  
9 was missed because of the necessity to ask about and record other items. This represents  
10 a missed opportunity for case-finding at a point in the review when the patient might have  
11 been receptive to exploring associated mood problems.  
12  
13  
14  
15  
16  
17  
18  
19  
20

21  
22 Difficulties arose in the consultation when the patient mentioned a problemsomething that  
23 the health professional was perceived to be important but unrelated to the disease under  
24 review. Sometimes the review had to be abandoned as the patient's agenda became too  
25 important to be ignored, or the patient too distressed to continue concentrating on the review.  
26  
27 This more patient-centred approach appeared to occur more often in practices that had  
28 lower than average QOF achievement, suggesting that such practices traded off potential  
29 income against responsiveness to patients.  
30  
31  
32  
33  
34  
35

### 36 *Professional uncertainty around how to undertake the case-finding itself*

37  
38 Professional beliefs and abilities affected how case-finding was undertaken. In conversation  
39 professionals expressed uncertainty about how best to phrase and ask the questions,  
40 particularly nursing staff who told the researcher they sometimes felt insufficiently trained on  
41 how to manage patients with possible depression. When asked, they questioned whether  
42 they were case-finding for QOF rather than patient benefit. We noticed that those who felt  
43 that the case-finding was for the benefit of patients appeared to work in practices that were  
44 in areas of low deprivation, where as those in areas of higher deprivation felt there was a  
45 lack of time to ask the questions and deal with any responses that might indicate a problem  
46 with mood. In the context of a time-restricted consultation they felt overburdened.  
47  
48  
49  
50  
51  
52  
53  
54  
55  
56  
57  
58  
59  
60

1  
2  
3 Field notes Practice A: [The nurse] referred to QOF as coming from “*on high*” to tell her  
4 to incorporate it [case-finding]. She felt depression screening was problematic as they  
5 had received “*no training*” in mental health or in screening and they were very  
6  
7  
8  
9 “*stretched for time in the appointment.*”  
10

11 Professionals avoided directly asking case-finding questions if they were familiar with  
12 patients but still recorded case-finding; they expressed beliefs that they could identify mood  
13 changes through existing knowledge of patients. They often adapted the questions to suit  
14 their consultation style or perceived patient needs.  
15  
16  
17  
18

19 Sometimes confusion arose when the questions were framed to ask whether the patient was  
20 coping with their illness, rather than to assess mood disorders in general. The patient  
21 answered that they were managing their condition well but did not talk about their mood.  
22 This was because the professionals believed the case-finding was to detect depression  
23 associated with chronic disease only, not depression of any cause.  
24  
25  
26  
27  
28  
29  
30

31 Nurse: *Then so do you feel ok about your diabetes, do you have any, do you worry*  
32 *about it, does it bother you at all?* Observation 27  
33  
34  
35

36 The case-finding questions were usually asked in the middle of chronic disease reviews.  
37 Generally the templates for such reviews were followed in order, with depression case-  
38 finding often occurring after discussion of alcohol consumption and smoking status. Once  
39 asked, the professional would move on to discuss diet and exercise. The case-finding  
40 questions appeared out of place in the consultation that mainly involved measuring physical  
41 factors rather than mood related problems. When asked about the case-finding, most  
42 nurses felt it was difficult to switch from asking something that could be measured (such as  
43 weight, units of alcohol consumed) to something more subjective.  
44  
45  
46  
47  
48  
49  
50  
51

### 52 *Reluctance to open a “can of worms”*

53  
54

55 Professionals at nearly every practice mentioned the term “can of worms” to express unease  
56 with case-finding for depression. This metaphor indicated professional perceptions of both  
57  
58  
59  
60

1  
2  
3 patient discomfort with being asked about emotions and their own emotional labour in asking  
4 the questions. “Can of worms” helped articulate the belief that case-finding for depression  
5 was anticipated as a problematic part of the consultation and threatened to derail routines.  
6  
7 Professionals anticipated having to manage and close down answers before patients began  
8 to give them; this often informed their immediate response to patients’ answers regardless of  
9 what patients said.  
10

11  
12 Many felt that by identifying a problem, it was their duty to uncover further the scale of the  
13 problem and to discuss this further with the patient, rather than requesting that the patient  
14 should make an appointment to discuss this with the doctor or when there would be more  
15 time to devote to this. It was hard to move the consultation onto the rest of the review. This  
16 often led to the questions being asked in a manner that made it difficult for the patient to  
17 answer ‘yes’, such as “you have no problems coping, do you?” pre-empting any difficulties  
18 the questions may cause.  
19  
20  
21  
22  
23  
24  
25  
26  
27  
28

29  
30 “Then Nurse 1 said *“it’s a question that makes you sigh, makes your heart heavy,*  
31 *because you’re there and you say “you’ve been down and depressed?”* and she said  
32 “loads of them saying “yes” and she’s thinking ‘no, you’re not, you’re not, depressed,  
33 depressed, you’re just a bit down, a bit fed up, aren’t we all!’ So then she has to say  
34 “Oh, why do you think that?” and it starts this 10 minute conversation that she really  
35 didn’t want to be having, because she’s had to do three blood pressure readings,  
36 loads of blood tests, trouble getting a vein, had to check their feet, loads of faffing  
37 around, she’s only got 20 minutes.” Field notes Practice F  
38  
39  
40  
41  
42  
43  
44  
45  
46

47 Patients seldom answered with a simple “yes” or “no” and brought up specific difficulties,  
48 such as bereavement. Following an initial acknowledgement, professionals then tended to  
49 move consultations on without discussing the effects of these life events on mood.  
50  
51 Therefore, professionals prematurely shut down patient responses suggesting emotional  
52 problems to reduce the risk of extended consultations.  
53  
54  
55  
56

57 Nurse: *Are you alright, you haven’t been having little interest in doing things, or?*  
58  
59  
60



1  
2  
3 Patient: *No, no.*

4 Nurse: *Are you fine, are you okay? That's okay.*

5  
6  
7 Patient: *It's been 10 years since I've lost [woman's name].*

8  
9 Nurse: *Is it, what, is that your wife?*

10  
11 Patient: *Yes.*

12  
13 Nurse: *10 years? That's a long time, isn't it? Can I just check your tablets then, do*  
14 *you take aspirin, [lists medication]...* Observation 23

15  
16  
17  
18 Some health care professionals talked about the emotional labour involved in case-finding.  
19  
20 Discussing depression was seen as being emotionally difficult and required feeling strong in  
21 themselves, in order to cope with the answer. The emotional burden was exacerbated by  
22 the professional's perception that regardless of the outcome of case-finding, there wouldn't  
23 be in any change for the better for the patient. They perceived they were expending a great  
24 deal of emotional labour on something that did not improve patient care and this  
25  
26  
27  
28  
29  
30 compounded their feelings.

31  
32  
33 “[The nurse] said she screened a woman with COPD who then cried and cried and  
34 then refused help and said she would sort herself out. This woman refused support  
35 and refused to quit smoking. Then she screened a man who was overweight and  
36 she'd just told him how serious his weight was and he cried about his weight and  
37 then she offered support with mood and weight loss and he said no. So she said  
38 most often it opens a can of worms, is demanding and difficult and rarely does  
39 anything come of it.” Field notes practice B

40  
41  
42  
43  
44  
45  
46  
47 *Patients being unaware of depression risk or case-finding taking place*

48  
49  
50 Many patients ~~screened~~ undergoing case-finding did not see themselves as the type of  
51 people who would be prone to depression and did not understand why they were asked.  
52  
53 They appreciated the idea that people should experience case-finding for depression but  
54  
55  
56 distanced themselves from the identity of those people. This sometimes led to defensive or  
57  
58  
59  
60

1  
2  
3 even defiant answers, or deflecting questions with humour in an apparent attempt to  
4 illustrate how preposterous it was to suspect that they might be suffering from depression.  
5  
6 This contradictory position of wanting everyone else to experience case-finding, seeing the  
7 purpose/necessity of asking the questions but, in contrast, not feeling they should be  
8  
9 ~~screened-questioned~~ and thus derided the process or made light of it. This illustrates that the  
10 case-finding process in itself does not impact on patient self-perception of who may suffer  
11 from depression and thus does not enable them to answer the questions honestly and  
12 openly. They were concerned that they were being seen as someone who could not cope.  
13 This especially occurred when the patient felt they had needed to be defensive over their  
14 lifestyle choices, such as diet, exercise, alcohol consumption, just before being  
15  
16 ~~screenedasked case-finding questions~~. The review was seen as a 'telling off' for not doing  
17 the right things which then made it difficult to answer subjective questions about mood.  
18  
19  
20  
21  
22  
23  
24  
25  
26

27 Nurse: *So during the past month have you been bothered by feeling down or*  
28 *depressed or hopeless at all?*  
29

30 Patient looks perplexed.

31 Patient: *I'm always...* (His voice cracks and pretends to cry and rub his eyes like a  
32 child) *Am I heck!*  
33

34 Fieldnote: Nurse shuffles in her seat and leans forward. She's smiling but not 100%  
35 comfortable. Observation 24  
36  
37  
38  
39  
40  
41

42 Interviewed patients articulated the belief that the professionals would pick up mood  
43 problems or not coping without the need for such questions. They felt being aware of  
44 depression was important in a generalised context but it did not fit with who they were, and  
45 so found it hard to understand in the context of a chronic disease review.  
46  
47  
48  
49  
50

51 Patient: *I mean if you're, if you're down they don't have to ask, they know so they*  
52 *start talking about it.* Interview 2  
53  
54

55 Several patients admitted difficulty with answering questions about mood within the chronic  
56 disease review during the interviews. They did not feel it was the appropriate place to  
57  
58  
59  
60

1  
2  
3 discuss mood and that the chronic disease review took over the consultation. Some  
4 mentioned that they would like to be asked at a separate appointment just to cover mood,  
5  
6 although also understood the difficulties in achieving this.  
7  
8

9  
10 *“Just the fact that it’s like a, a review appointment and that I’m under time pressure*  
11 *so it’s not, I feel like if I am to be asked about like depression and something like that,*  
12 *there has to be a separate one (I: right) or like something depression, or like mood,*  
13 *sort of like mental illness or like anxiety or whatever, like related, an appointment*  
14 *related specifically to that or like a clinic specifically related to that.” Interview 21*  
15  
16  
17  
18

19  
20 Patients were mostly unaware of the increased prevalence of depression in chronic illness,  
21 although felt they understood why it might occur. They suggested that introducing the case-  
22 finding questions following an explanation that depression was more common in chronic  
23 illness might facilitate disclosure; this rarely happened in practice.  
24  
25  
26  
27  
28

29  
30 *Researcher: So when the nurse asks you about your mood... just like I’m trying to*  
31 *imagine your perspective, why do you think that she’s asking these questions*  
32 *usually when you get asked?*  
33  
34  
35

36  
37 *Patient: I don’t know really, I didn’t know whether it was because of my history [of*  
38 *depression] or... I didn’t realise that people with heart problems and diabetes get*  
39 *depressed. I suppose if you’re not well or you’ve got on going things with you, I*  
40 *suppose it can depress you.” Interview 44*  
41  
42  
43  
44

45 *Competing practice priorities and inconsistent lines of communication around the*  
46 *management of potential cases of depression*  
47  
48

49  
50 Practices varied in how they prioritised and organised case-finding for depression. Some  
51 practices devoted a lot of time and energy whilst others considered that some elements of  
52 QOF, such as the depression indicators, required too much effort for too little gain.  
53  
54  
55  
56  
57  
58  
59  
60

1  
2  
3 Field notes, Practice B: This leads to a debate over the decision between QOF  
4 payments and the work put in to achieve those payments. GPs are saying they  
5 should “*choose their battles.*”  
6  
7  
8  
9

10 One practice did not concentrate on QOF at all and offered a different style of practice to  
11 their patients, with patients being seen as and when they wanted and most staff being  
12 unaware of the QOF domains and items needed, or where to find them on the computer  
13 system. Despite this, the nursing staff still used the QOF template to conduct the chronic  
14 disease reviews.  
15  
16  
17  
18  
19

20 “I ask how many patients haven’t been screened for depression in the last 15months.  
21  
22

23 No one knows how to find this out (including the Practice Manager and the IT guy).”  
24

25 Field notes Practice J  
26

27 Five out of 63 patients ~~screened-had~~ positive results to case-finding; practices subsequently  
28 acted on one of these. Two patients who had screened-negative case-finding subsequently  
29 consulted to seek help for mood problems. Our follow up highlighted inconsistent systems  
30 and lines of communication within practices for dealing with- positive result on case-finding  
31 screen-positive patients. Although GPs were aware that nursing staff undertook case finding,  
32 many did not know how a positive screen-case-finding would be communicated to them.  
33  
34  
35  
36  
37  
38  
39  
40  
41  
42  
43  
44  
45  
46  
47  
48  
49  
50  
51  
52  
53  
54  
55  
56  
57  
58  
59  
60

50 Practices in areas with less deprivation seemed more likely to have a specified system for  
51 following up positive case-finding results.  
52  
53  
54

55 “[The nurse] said if they answered they were depressed she’d do the PHQ9 with  
56 them and make them an appointment to see the Dr but she felt the Dr wouldn’t do  
57  
58  
59  
60

1  
2  
3 anything for them and doing the PHQ9 makes her run late so she's conflicted  
4 about how useful it is to screen if you feel no one cares about the result." Field  
5 notes Practice A  
6  
7

8  
9  
10 "[The doctor] said she didn't really look at the mental health stuff. I said *"Is there like a*  
11 *system in place or does a score of two trigger anything, or?"* and she said *"no, maybe*  
12 *we need to look at that."* But she left it there." Field notes Practice F  
13  
14  
15

## 16 17 Discussion

18  
19 Case-finding for depression did not naturally fit within primary care consultations. It  
20 appeared to augment-cause discordance between professionals and patients. Professionals  
21 struggled to align case-finding with a person-centred approach and were wary of the risk of  
22 patients' emotional issues derailing routine reviews. Professionals believed it was good to  
23 ask about mental health but disliked the structure of the PHQ-2 and feeling forced to add it to  
24 consultations. They subsequently responded by going 'off script' or discounting cues.  
25 Patients sometimes did not understand why the case-finding questions were being asked, or  
26 did not see themselves as the type of people prone to depression. This led to defensiveness  
27 or even defiance in their responses, especially if not anticipated as part of their review.  
28 Practice responses to case finding outcomes were haphazard, which may have reflected  
29 professional ambivalence towards depression case-finding and the available treatment  
30 options for those identified as having depression.  
31

32  
33 Case-finding for depression exemplifies what happens when attempts are made to fit  
34 apparently straightforward but deceptively complex interventions into primary care  
35 consultations and systems. Previously, only anecdotal evidence and interviews with GPs  
36 have suggested that implementing case-finding was more difficult than intended [27 34 35].  
37

38  
39 This study provides clear evidence to the barriers faced by professionals and patients in  
40 implementing depression case-finding in practice, as well as observational data of what  
41 actually happens in practice that both parties may not be aware of. Implementing  
42  
43  
44  
45  
46  
47  
48  
49  
50  
51  
52  
53  
54  
55  
56  
57  
58  
59  
60

1  
2  
3 depression case-finding is different to other QOF targets as the topic itself is subject to  
4  
5 significant stigma from both parties.  
6

7  
8 This study provides the strongest evidence yet that the principle of interrupting the flow of  
9  
10 clinical conversation to ask out-of-context questions about sensitive issues has many  
11  
12 significant barriers in clinical consultations. Much has been written about how QOF checklist  
13  
14 approaches have disrupted consultation flows and led to the patient agenda being unheard  
15  
16 [36-39]. This is part of a wider phenomenon. For example, Rousseau *et al* demonstrated  
17  
18 how a set of computerised prompts conflicted with established consultation processes [40].  
19  
20 Adding the case-finding questions to these processes is inappropriate when the scripts and  
21  
22 protocols have already created discordance between agendas. Such experience highlights  
23  
24 the need for systematic development and evaluation of such interventions to ensure  
25  
26 acceptability and feasibility before wider roll-out [41]. Despite their apparent simplicity, our  
27  
28 study has shown that depression case-finding questions were not implemented consistently  
29  
30 within consultations and practice routines.  
31

32  
33 Our findings also help explain the lack of benefit of case-finding when it is implemented  
34  
35 outside of collaborative care models [14]. We identified mixed attitudes towards case-finding  
36  
37 amongst both professionals and patients, coupled with the absence of agreed pathways for  
38  
39 patient follow-up and management. Collaborative care, with explicit monitoring and  
40  
41 structured management of both physical and mental health problems could help alleviate  
42  
43 some of the barriers identified in this study.  
44

45  
46 Study limitations mainly related to the nature of our observations, and sampled practices.

47  
48 We were aware of the intrusive nature of observation and the likelihood that people behaved  
49  
50 differently when under observation. For example, professionals may have made more of an  
51  
52 effort to ask the PHQ2 questions sensitively, or ask them at all. When possible, observation  
53  
54 began following a period of familiarisation to allow the healthcare professional to grow used  
55  
56 to the researcher's presence. A week may also be insufficient to fully understand all practice  
57  
58 processes and relationships; however, similar approaches have produced substantial  
59  
60

1  
2  
3 insights into healthcare organisational behaviour elsewhere [42]. Even allowing for these  
4 limitations, it is striking how often professionals did deviate from recommended practice.

5  
6 Professionals and patients are often used to the presence of a third party during  
7 consultations for training purposes, although some of the nurses observed did comment on  
8 feeling under pressure to demonstrate that they were following procedures correctly.

9  
10 The generalizability of our findings may be limited given that this study took place within one  
11 geographical area. However, Leeds is typical of UK cities in terms of social deprivation  
12 indices, demographics, characteristics of primary care services and distribution of common  
13 diseases such as CHD and diabetes [43]. Furthermore, we sampled a relatively diverse  
14 range of practices and found that practice characteristics, such as deprivation and QOF  
15 achievement, affected how case-finding was approached. Opportunistic case findings were  
16 under-represented in our sample of 63 consultations but we did not find any systematic  
17 differences from chronic disease review case findings in our analysis.

18  
19 We identified a range of problems with incentivised screening case-finding for depression.

20  
21 Our accompanying interrupted time series analysis indicates that incentivised case-finding  
22 did change clinical behaviour, increasing new depression-related diagnoses and, compared  
23 with untargeted patients with chronic illness, perpetuated increasing rates of antidepressant  
24 prescribing [29]. It is difficult to predict with any confidence whether greater changes would  
25 have occurred if case-finding had been applied with greater fidelity. However, our findings  
26 have broader implications for efforts to improve detection of depression in people with  
27 chronic illness.

28  
29 Specifically, all of patients, professionals and healthcare systems need to be prepared in  
30 advance of case-finding. Firstly, for patients, experience with the diagnostic disclosure of  
31 illnesses such as dementia and cancer suggests that acceptance is facilitated by a series of  
32 negotiated steps rather than a 'one-off' process [44 45]. For example, patients in our study  
33 indicated they would have been more receptive to case-finding had they received  
34 information beforehand about the higher prevalence of depression in chronic physical illness.

1  
2  
3 It is also possible that the act of case-finding does form an initial step in helping patients  
4 consider and come to terms with a diagnosis of depression, given that we found patients  
5 with negative case-finding screen-negative patients subsequently consulted with mood  
6  
7  
8 problems. Secondly, professional attitudes towards and skills required in the detection of  
9  
10 depression need to be examined. Some voiced unease about whether they were  
11  
12 incorporating the questions correctly within consultations or uncertainty about how to handle  
13  
14 potential new diagnoses, particularly nursing staff. Thirdly, resources and care pathways  
15  
16 need to be optimised to accommodate detection and follow up. Patients identified through  
17  
18 case-finding are more likely to have mild-moderate rather than severe depression and less  
19  
20 likely to benefit from antidepressant treatment [46 47]. Resources are needed to manage  
21  
22 those identified through case-finding recommended by clinical guidelines. Health  
23  
24 professionals were understandably reluctant to open up a “can of worms” during tightly  
25  
26 restricted chronic illness reviews; the exploration of sensitive issues requires greater  
27  
28 flexibility in consultation time. We also found instances where positive results on case-  
29  
30 finding screen-positives were not acted upon given the absence of explicitly agreed  
31  
32 pathways within practices.  
33  
34

35  
36 There are more general lessons beyond depression detection. Mood disorders are not the  
37  
38 only sensitive issue raised during chronic illness reviews. Our findings should prompt a  
39  
40 reappraisal of how such reviews are designed and implemented for other emotionally-laden  
41  
42 problems integral to chronic illness care, such as weight management, sexual dysfunction  
43  
44 and alcohol misuse [48]. Health professionals may welcome structured protocols to help  
45  
46 ensure coverage of key issues; there is evidence that prompting interventions have a small  
47  
48 to modest effect on practice and patient outcomes [49]. However, such approaches have  
49  
50 been less successful in addressing relatively complex clinical behaviours, especially for  
51  
52 chronic illness management [50]. The subsequent challenge for quality improvement  
53  
54 programmes and research is to further explore and evaluate how to develop interventions  
55  
56 which can be embedded within primary care systems and consultations to improve  
57  
58  
59  
60



1  
2  
3 population outcomes whilst preserving patient-centred care. The National Institute for Health  
4 and Care Excellence guidance on implementation recommends direct observation of  
5  
6 practice as one way to identify potential barriers to changing practice [51] and although we  
7  
8 have demonstrated the value of direct observation in evaluating new policy initiatives  
9  
10 compared to (say) interview studies alone, it is not routinely undertaken when introducing  
11  
12 new QOF indicators[11].

13  
14  
15 Incentivised case-finding exacerbated tensions between perceived patient-centredness and  
16  
17 the time-limited routine of the consultation. Both professionals and patients reacted to the  
18  
19 imposition of case-finding by adapting, or even subverting, the process recommended by  
20  
21 national guidance. Despite their apparent simplicity, the case-finding questions are not  
22  
23 consultation-friendly, and acceptable alternative ways to raise mood disorders merit further  
24  
25 exploration, as well as guidance on how to introduce the questions so patients don't feel  
26  
27 depression is something that happens to 'other people' as our patient's awareness theme  
28  
29 suggests. ~~If case-finding is to be recommended for other patient groups,~~ Ppractice teams  
30  
31 need clearer guidance on the pathway for people with likely depression which can be  
32  
33 accommodated within available systems and resources.  
34  
35

#### 36 37 **What is already known on this topic**

- 38  
39 • Case-finding for depression was incentivised in UK primary care to increase  
40  
41 depression diagnosis and management.
- 42  
43 • Evidence that case-finding has improved depression outcomes is lacking and health  
44  
45 care professionals have expressed dissatisfaction with its implementation.

#### 46 47 48 **What this study adds**

- 49  
50 • Patients and health care professionals subverted the standardised process of  
51  
52 depression case-finding to suit their consultation style and needs.
- 53  
54 • Case-finding needs to be aligned with structured care processes and how healthcare  
55  
56

professionals and patients think about mood problems in chronic physical disease.

### **Ethics Approval**

This study was approved by the South West - Exeter Research Ethics Committee (reference 11/SW/0335). The participants gave informed consent before taking part.

### **Funding**

This paper summarises independent research funded by the National Institute for Health Research (NIHR) under its Research for Patient Benefit (RfPB) Programme (Grant Reference Number PB-PG-0110-21046). The views expressed are those of the authors and not necessarily those of the NHS, the NIHR or the Department of Health. Study sponsors, the University of Leeds, and NIHR RfPB had no role in study design, in the collection, analysis and interpretation of data, in the writing of the report, and in the decision to submit the article for publication. All authors had full access to all of the data in the study and can take responsibility for the integrity of the data and the accuracy of the data analysis.

### **Transparency Declaration**

Dr Sarah L Alderson, the lead author (the manuscript's guarantor), affirms that the manuscript is an honest, accurate, and transparent account of the study being reported; that no important aspects of the study have been omitted; and that any discrepancies from the study as planned have been explained.

### **Data sharing statement**

Data sharing: no additional data available.

### **Contributorship Statement**

RF and AH conceived the project. RF was principal investigator. SA and KM designed the study. SA and AR were responsible for running the project. AR was responsible for data

1  
2  
3 collection. All authors interpreted the data and findings. SA wrote the first draft of the  
4  
5 manuscript. RF commented on the first draft and all authors commented on further revisions.  
6  
7 SA is guarantor of the paper.  
8

### 9 10 **Competing interests**

11  
12 All authors received funding from National Institute of Health Research to undertake this  
13  
14 study.  
15

### 16 17 **References**

- 18  
19 1. Goldney RD, Phillips PJ, Fisher LJ, Wilson DH. Diabetes, Depression, and Quality of Life. *Diabetes*  
20 *Care* 2004;**27**(5):1066-70 doi: 10.2337/diacare.27.5.1066[published Online First: Epub Date] | .  
21
- 22 2. Rudisch B, Nemeroff CB. Epidemiology of comorbid coronary artery disease and depression.  
23 *Biological Psychiatry* 2003;**54**(3):227-40  
24
- 25 3. Carney RM, Freedland KE, Miller GE, Jaffe AS. Depression as a risk factor for cardiac mortality and  
26 morbidity: A review of potential mechanisms. *Journal of Psychosomatic Research*  
27 2002;**53**(4):897-902  
28
- 29 4. Anderson RJ, Freedland KE, Clouse RE, Lustman PJ. The Prevalence of Comorbid Depression in  
30 Adults With Diabetes: A meta-analysis. *Diabetes Care* 2001;**24**(6):1069-78 doi:  
31 10.2337/diacare.24.6.1069[published Online First: Epub Date] | .  
32
- 33 5. Simon GE, VonKorff M. Recognition, management, and outcomes of depression in primary care.  
34 1995(2):99-105  
35
- 36 6. Barth J, Schumacher M, Herrmann-Lingen C. Depression as a Risk Factor for Mortality in Patients  
37 With Coronary Heart Disease: A Meta-analysis. *Psychosom. Med.* 2004;**66**(6):802-13 doi:  
38 10.1097/01.psy.0000146332.53619.b2[published Online First: Epub Date] | .  
39
- 40 7. Katon W, Ciechanowski P. Impact of major depression on chronic medical illness. *Journal of*  
41 *Psychosomatic Research* 2002;**53**(4):859-63  
42
- 43 8. National Institute of Clinical Excellence. Depression in adults with a chronic physical health  
44 problem: treatment and management. NICE. : NICE, 2009.  
45
- 46 9. New Zealand Guidelines Group. Identification of Common Mental Disorders and Management of  
47 Depression in Primary Care. An Evidence-based Best Practice Guideline. Wellington, 2008.  
48
- 49 10. US Preventative Services Task Force. Screening for Depression in Adults: U.S. Preventive Services  
50 Task Force Recommendation Statement. *Annals of Internal Medicine* 2009;**151**(11):784-92  
51 doi: 10.1059/0003-4819-151-11-200912010-00006[published Online First: Epub Date] | .  
52
- 53 11. University of Birmingham and University of York Health Economics Consortium. NM49 indicator  
54 development feedback report 2012.  
55
- 56 12. BMJ Best Practice. Screening: Patient Health Questionnaire-2 (PHQ-2). *BMJ Best Practice* 2010.  
57 <http://bestpractice.bmj.com/best-practice/monograph/55/prevention.html>.  
58
- 59 13. Health and Social Care Information Centre. Quality Outcomes Framework 2012/13 results.  
60 Secondary Quality Outcomes Framework 2012/13 results 2013.  
<http://qof.hscic.gov.uk/index.asp>.

14. Gilbody S, Sheldon T, House A. Screening and case-finding instruments for depression: a meta-analysis. *Canadian Medical Association Journal* 2008;**178**(8):997-1003 doi: 10.1503/cmaj.070281[published Online First: Epub Date]].
15. Dowrick C, Buchan I. Twelve month outcome of depression in general practice: does detection or disclosure make a difference? *BMJ* 1995;**311**(7015):1274-76
16. Gilbody SM, House A, Sheldon T. Screening and case finding instruments for depression [Systematic Review]. *Cochrane Database of Systematic Reviews* 2009;**3**:3
17. Pignone MP, Gaynes BN, Rushton JL, et al. Screening for Depression in Adults: A Summary of the Evidence for the U.S. Preventive Services Task Force. *Annals of Internal Medicine* 2002;**136**(10):765-76 doi: 10.7326/0003-4819-136-10-200205210-00013[published Online First: Epub Date]].
18. Gilbody S, Sheldon T, Wessely S. Should we screen for depression? *BMJ* 2006;**332**(7548):1027-30 doi: 10.1136/bmj.332.7548.1027[published Online First: Epub Date]].
19. National Screening Committee. Programme Appraisal Criteria. Secondary Programme Appraisal Criteria 2013. [www.screening.nhs.uk/criteria](http://www.screening.nhs.uk/criteria).
20. Serumaga B, Ross-Degnan D, Avery A, et al. Effect of pay for performance on the management and outcomes of hypertension in the United Kingdom: interrupted time series study. *BMJ* 2011;**342**:d108
21. Campbell SM, Reeves D, Kontopantelis E, Sibbald B, Roland M. Effects of Pay for Performance on the Quality of Primary Care in England. *N Engl J Med* 2009;**361**:368-78
22. Scott A, Sivey P, Ait Ouakrim D, et al. The effect of financial incentives on the quality of health care provided by primary care physicians. *Cochrane Database Syst Rev* 2011(9):CD008451
23. Checkland K, Harrison S, McDonald R, Grant S, Campbell SM, Guthrie B. Biomedicine, holism and general medical practice: responses to the 2004 General Practitioner contract. *Sociology of Health and Illness* 2008;**30**:788-803
24. McDonald R, Harrison S, Checkland K, Campbell S, Roland M. Impact of financial incentives on clinical autonomy and internal motivation in primary care: ethnographic study. *BMJ* 2007;**334**(7608):1333-34
25. Maisey S, Steel N, Marsh R, Gillam S, Fleetcroft R, Howe A. Effects of payment for performance in primary care: qualitative interview study. *Journal of Health Services Research & Policy* 2008;**13**(3):133-39 doi: 10.1258/jhsrp.2008.007118[published Online First: Epub Date]].
26. Mitchell C, Dwyer R, Hagan T, Mathers N. Impact of the QOF and the NICE guideline in the diagnosis and management of depression: a qualitative study. *Br. J. Gen. Pract.* 2011;**61**(586):e279-e89 doi: 10.3399/bjgp11X572472[published Online First: Epub Date]].
27. Coventry PA, Hays R, Dickens C, et al. Talking about depression: a qualitative study of barriers to managing depression in people with long term conditions in primary care. *BMC Fam Pract* 2011;**12**:10 doi: 10.1186/1471-2296-12-10[published Online First: Epub Date]].
28. Dowrick C, Leydon GM, McBride A, et al. Patients' and doctors' views on depression severity questionnaires incentivised in UK quality and outcomes framework: qualitative study. *Br. Med. J.* 2009;**338**:6 doi: b663  
10.1136/bmj.b663[published Online First: Epub Date]].
29. McLintock K, Russell A, West R, et al. Effect of financial incentives on screening for depression in patients with chronic disease in the United Kingdom: an interrupted time series study. Manuscript in preparation 2013

- 1  
2  
3 30. Practitioners RCoG. Supporting Carers: An action guide for general practitioners and their teams.:  
4 Royal College of General Practitioners, 2011.  
5  
6 31. Burden AD, Boon MH, Leman J, Wilson H, Richmond R, Ormerod AD. Diagnosis and management  
7 of psoriasis and psoriatic arthritis in adults: summary of SIGN guidance. *BMJ* 2010;**341** doi:  
8 10.1136/bmj.c5623[published Online First: Epub Date]].  
9  
10 32. Collier F, Smith RC, Morton CA. Diagnosis and management of hidradenitis suppurativa. *BMJ*  
11 2013;**346** doi: 10.1136/bmj.f2121[published Online First: Epub Date]].  
12  
13 33. Emerson RM, Fretz RI, Shaw LL. *Writing ethnographic fieldnotes*. 2nd ed: University of Chicago  
14 Press, 2011.  
15  
16 34. Anekwe L. QOF depression indicators face axe. *Pulse* 2011(June 2011)  
17  
18 35. Maxwell M, Harris F, Hibberd C, et al. A qualitative study of primary care professionals' views of  
19 case finding for depression in patients with diabetes or coronary heart disease in the UK.  
20 *BMC Fam Pract* 2013;**14**:46  
21  
22 36. Chew-Graham CA, Hunter C, Langer S, et al. How QOF is shaping primary care review  
23 consultations: a longitudinal qualitative study. *BMC Fam Pract* 2013;**14**(1):103  
24  
25 37. Campbell SM, McDonald R, Lester H. The experience of pay for performance in English family  
26 practice: a qualitative study. *Annals of Family Medicine* 2008;**6**(3):228-34  
27  
28 38. Hannon KL, Lester HE, Campbell SM. Patients' views of pay for performance in primary care: a  
29 qualitative study. *Br. J. Gen. Pract.*; **62**(598):e322-e28 doi: 10.3399/bjgp12X641438[published  
30 Online First: Epub Date]].  
31  
32 39. Lester H, Matharu T, Mohammed MA, Lester D, Foskett-Tharby R. Implementation of pay for  
33 performance in primary care: a qualitative study 8 years after introduction. *Br. J. Gen. Pract.*  
34 2013;**63**(611):e408-e15 doi: 10.3399/bjgp13X668203[published Online First: Epub Date]].  
35  
36 40. Rousseau N, McColl E, Newton J, Grimshaw J, Eccles M. Practice based, longitudinal, qualitative  
37 interview study of computerised evidence based guidelines in primary care. *BMJ*  
38 2003;**326**(7384):314 doi: 10.1136/bmj.326.7384.314[published Online First: Epub Date]].  
39  
40 41. Craig P, Dieppe P, Macintyre S, Michie S, Nazareth I, Petticrew M. Developing and evaluating  
41 complex interventions: the new Medical Research Council guidance. *BMJ* 2008;**337** doi:  
42 10.1136/bmj.a1655[published Online First: Epub Date]].  
43  
44 42. Dixon-Woods M, Leslie M, Bion J, Tarrant C. What Counts? An Ethnographic Study of Infection  
45 Data Reported to a Patient Safety Program. *Milbank Quarterly* 2012;**90**(3):548-91 doi:  
46 10.1111/j.1468-0009.2012.00674.x[published Online First: Epub Date]].  
47  
48 43. Public Health England. National General Practice Profiles - Leeds PCT. Secondary National  
49 General Practice Profiles - Leeds PCT 2013.  
50 <http://www.apho.org.uk/PracProf/Profile.aspx#mod,2,pyr,2012,pat,2,par,E16000074,are,-,sid1,2000002,ind1,243-4,sid2,2000005,ind2,->  
51  
52 44. Fallowfield L, Jenkins V. Effective communication skills are the key to good cancer care. *European*  
53 *journal of cancer* (Oxford, England : 1990) 1999;**35**(11):1592-7  
54  
55 45. Lecouturier J, Bamford C, Hughes J, et al. Appropriate disclosure of a diagnosis of dementia:  
56 identifying the key behaviours of 'best practice'. *BMC Health Services Research* 2008;**8**(1):1-  
57 10 doi: 10.1186/1472-6963-8-95[published Online First: Epub Date]].  
58  
59 46. Coyne JC, Schwenk TL, Fechner-Bates S. Nondetection of depression by primary care physicians  
60 reconsidered. *General Hospital Psychiatry* 1995;**17**(1):3-12 doi:  
[http://dx.doi.org/10.1016/0163-8343\(94\)00056-J](http://dx.doi.org/10.1016/0163-8343(94)00056-J)[published Online First: Epub Date]].

- 1  
2  
3 47. Arroll B, Goodyear-Smith F, Crengle S, et al. Validation of PHQ-2 and PHQ-9 to screen for major  
4 depression in the primary care population. *Ann Fam Med* 2010;**8**(4):348-53 doi:  
5 10.1370/afm.1139[published Online First: Epub Date]].  
6  
7 48. Crosson JC, Heisler M, Subramanian U, et al. Physicians' Perceptions of Barriers to Cardiovascular  
8 Disease Risk Factor Control among Patients with Diabetes: Results from the Translating  
9 Research into Action for Diabetes (TRIAD) Study. *The Journal of the American Board of*  
10 *Family Medicine* 2010;**23**(2):171-78 doi: 10.3122/jabfm.2010.02.090125[published Online  
11 First: Epub Date]].  
12  
13 49. Shojania Kaveh G, Jennings A, Mayhew A, Ramsay Craig R, Eccles Martin P, Grimshaw J. The  
14 effects of on-screen, point of care computer reminders on processes and outcomes of care.  
15 *Cochrane Database of Systematic Reviews* 2009; (3).  
16 <http://onlinelibrary.wiley.com/doi/10.1002/14651858.CD001096.pub2/abstract>.  
17  
18 50. Grimshaw JM, Eccles MP, Lavis JN, Hill SJ, Squires JE. Knowledge translation of research findings.  
19 *Implementation Science* 2012;**7**(50):1-29  
20  
21 51. National Institute for Health and Care Excellence. Into practice guide: Using NICE guidance and  
22 quality standards to improve practice, 2013.  
23  
24  
25  
26  
27  
28  
29  
30  
31  
32  
33  
34  
35  
36  
37  
38  
39  
40  
41  
42  
43  
44  
45  
46  
47  
48  
49  
50  
51  
52  
53  
54  
55  
56  
57  
58  
59  
60

**Table 1 – Observed practice characteristics**

| Surgery    | QOF score* | List Size* | Deprivation Score* | Patients Recruited |
|------------|------------|------------|--------------------|--------------------|
| Practice A | Low        | Low        | Low                | 3                  |
| Practice B | Low        | High       | High               | 13                 |
| Practice C | Low        | High       | Low                | 5                  |
| Practice D | High       | High       | Low                | 6                  |
| Practice E | High       | High       | High               | 6                  |
| Practice F | High       | Low        | High               | 5                  |
| Practice G | Low        | High       | Low                | 5                  |
| Practice H | Low        | Low        | Low                | 5                  |
| Practice I | High       | High       | Low                | 4                  |
| Practice J | Low        | Low        | High               | 5                  |
| Practice K | Low        | Low        | High               | 4                  |
| Practice L | High       | Low        | Low                | 2                  |

\* Compared to Primary Care Trust median

Table 2 - Patient demographics in observed consultations

|                                                | <u>No. of patients</u> | <u>% of patients</u> |
|------------------------------------------------|------------------------|----------------------|
| <b><u>Gender</u></b>                           |                        |                      |
| Female                                         | 21                     | 33%                  |
| Male                                           | 42                     | 67%                  |
| <b><u>Age group</u></b>                        |                        |                      |
| 18-30                                          | 7                      | 11%                  |
| 31-50                                          | 5                      | 8%                   |
| 51-64                                          | 18                     | 29%                  |
| 65-79                                          | 28                     | 44%                  |
| 80+                                            | 5                      | 8%                   |
| <b><u>Chronic Illness</u></b>                  |                        |                      |
| CHD                                            | 13                     | 21%                  |
| DM                                             | 46                     | 73%                  |
| CHD & DM                                       | 4                      | 6%                   |
| <b><u>Ethnicity</u></b>                        |                        |                      |
| White British                                  | 49                     | 78%                  |
| Mixed British                                  | 1                      | 2%                   |
| White Irish                                    | 2                      | 3%                   |
| Chinese                                        | 1                      | 2%                   |
| Black Caribbean                                | 5                      | 8%                   |
| Pakistani                                      | 3                      | 5%                   |
| British Asian                                  | 1                      | 2%                   |
| Indian                                         | 1                      | 2%                   |
| <b><u>Previous diagnosis of depression</u></b> |                        |                      |
| Yes                                            | 9                      | 14%                  |
| No                                             | 54                     | 86%                  |

Figure 1. Flow chart of idealised depression case-finding process and barriers identified.



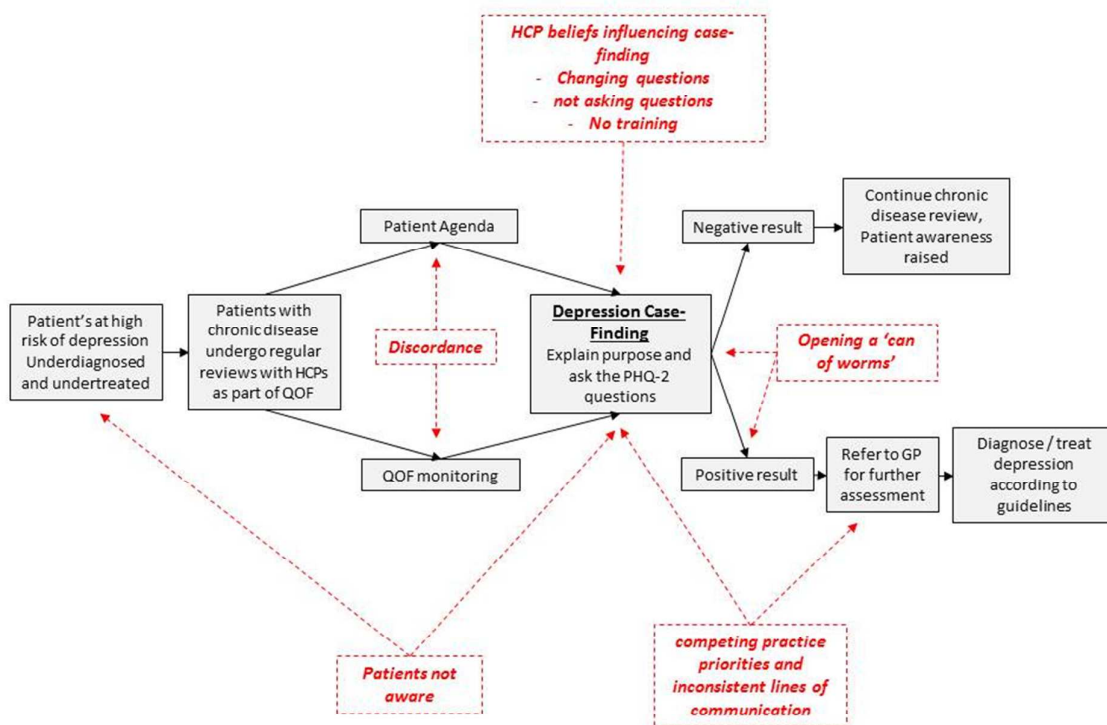

review only

1  
2  
3  
4  
5  
6  
7  
8  
9  
10  
11  
12  
13  
14  
15  
16  
17  
18  
19  
20  
21  
22  
23  
24  
25  
26  
27  
28  
29  
30  
31  
32  
33  
34  
35  
36  
37  
38  
39  
40  
41  
42  
43  
44  
45  
46  
47  
48  
49  
50  
51  
52  
53  
54  
55  
56  
57  
58  
59  
60

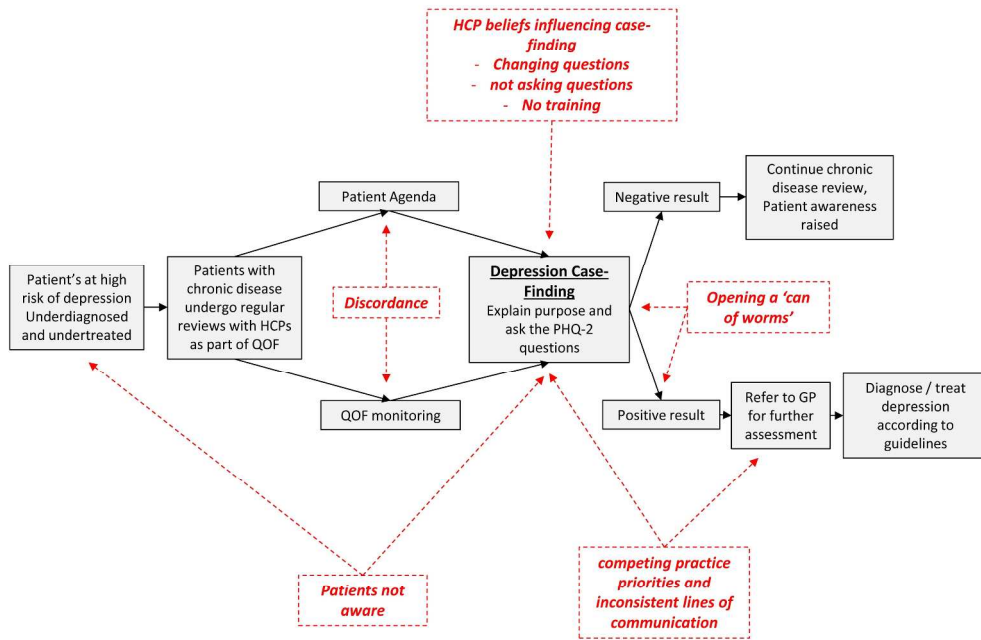

Figure 1. Flow chart of idealised depression case-finding process and barriers identified. 254x190mm (300 x 300 DPI)

Review only
